# Supplementary material
Source: Elsevier journal article supplement (https://openaccess.sgul.ac.uk/id/eprint/117809/2/mmc1.docx)
Supplement: mmc1 [file mmc1.docx]

Supplemental Material

Dronedarone Versus Sotalol Among Patients With Atrial Fibrillation: A Meta-analysis of Retrospective Observational Databases

**Table of Contents**

1. [Supplemental Methods 3](#_heading=h.gjdgxs)
   1. [Study Period - Optum, MarketScan, and VHA EHR Databases 3](#_heading=h.30j0zll)

[Supplemental Figure 1. Study Design for US Population 4](#_heading=h.1fob9te)

- 1. [Study Period - Swedish NPR Database 5](#_heading=h.3znysh7)

[Supplemental Figure 2. Study Design for Swedish Population 6](#_heading=h.2et92p0)

- 1. [Inclusion Criteria 7](#_heading=h.tyjcwt)
  2. [Exclusion Criteria 7](#_heading=h.3dy6vkm)
  3. [Variables 7](#_heading=h.1t3h5sf)
     1. [Exposure 7](#_heading=h.4d34og8)
     2. [Outcomes 8](#_heading=h.2s8eyo1)
     3. [Covariates 8](#_heading=h.17dp8vu)
  4. [Data Sources and Measurement 12](#_heading=h.3rdcrjn)
  5. [Study Size 13](#_heading=h.26in1rg)
  6. [Data Management and Transformation 13](#_heading=h.lnxbz9)
  7. [Statistical Methods 14](#_heading=h.35nkun2)
     1. [Main Summary Measures 14](#_heading=h.1ksv4uv)
     2. [Main Statistical Methods 14](#_heading=h.44sinio)
     3. [Missing Values 15](#_heading=h.2jxsxqh)
     4. [Sensitivity Analyses 15](#_heading=h.z337ya)
     5. Inverse Probability of Censoring Weighting Analysis 17

1. [Supplemental Results 19](#_heading=h.3j2qqm3)
   1. [Additional Baseline Demographic and Clinical Characteristics Results 19](#_heading=h.1y810tw)

[Supplemental Table 1. Pre-matched Baseline Demographic and Clinical Characteristics Included in the Propensity Score Model 19](#_heading=h.4i7ojhp)

[Supplemental Table 2. Pre-matched Baseline Demographic and Clinical Characteristics Not Included in the Propensity Score Model 25](#_heading=h.2xcytpi)

[Supplemental Table 3. Post-matched Baseline Demographic and Clinical Characteristics Included in the Propensity Score Model 32](#_heading=h.1ci93xb)

[Supplemental Table 4. Post-matched Baseline Demographic and Clinical Characteristics Not Included in the Propensity Score Model 39](#_heading=h.3whwml4)

[Supplemental Table 5. Incidence Rates for Outcomes of CV Hospitalization, Ventricular Arrhythmias, and Bradyarrhythmias Associated With Syncope Or Pacemaker Implant Among Propensity Score–Matched Patients With AF Newly Initiating Dronedarone Versus Sotalol in the Outpatient Setting 45](#_heading=h.bncgu3jnft6j)

- 1. [Additional Sensitivity Analysis Results 46](#_heading=h.2bn6wsx)

Supplemental Table 6. Sensitivity analysis effect estimates for outcomes of CV hospitalization and ventricular arrhythmias among propensity score–matched patients with AF newly initiating dronedarone versus sotalol in the outpatient setting 47

1. Measure Definitions 48
   1. Exposure Definitions 48
   2. Outcome Definitions 49
   3. Inclusion Criteria Definitions 56
   4. Exclusion Criteria Definitions 57
   5. Baseline Clinical Characteristics and Healthcare Resource Utilization Definitions 60
   6. Concomitant Therapy Definitions 72
2. References 77

# Supplemental Methods

# Study Period - Optum, MarketScan, and VHA EHR Databases

As illustrated in Supplemental Figure 1, the following periods were used to identify patients in the Optum Clinformatics Data Mart (Optum), Merative MarketScan (MarketScan), and Veterans Health Administration (VHA) Electronic Health Record (EHR) databases for inclusion in each objective:

- *Study period:* The full study time range from July 1, 2011, until the end of available data; end of available data was June 20, 2021, in MarketScan, April 30, 2022, in Optum, and June 30, 2021, in VHA EHR.
- *Patient identification period:* The period between January 1, 2012, and 6 months prior to the end of available data, which allowed for a potential follow-up period of at least 6 months for each patient.
- *Index date:* The index date was defined by the first claim/record for sotalol or dronedarone (i.e., the index medication) during the patient identification period following a 180-day baseline period; the earliest possible index date was January 1, 2012.
- *Baseline period:*180-day period prior to but not including the index date, with the earliest start of the baseline period on July 1, 2011; this period was used to assess exclusion criteria and continuous baseline enrollment/eligibility.
- *Covariate assessment period 1:* Selected covariates (demographic characteristics and atrial fibrillation [AF] type) were assessed on the index date. All other covariates, including comorbidities and concomitant therapies, were assessed in Covariate assessment period 2 (defined below).
- *Covariate assessment period 2:* Period from 180 days to 1 day prior to the index date, with the earliest possible start date of July 1, 2011, as dictated by the study period parameters.
- *Follow-up period:* Starting from the index date, the time until the earliest of disenrollment or loss of benefits eligibility, recorded death event, discontinuation of the exposure medication (see Section 1.5.1), use of any class I or class III antiarrhythmic drug (AAD) other than the index medication, occurrence of the outcome, or the end of available data.


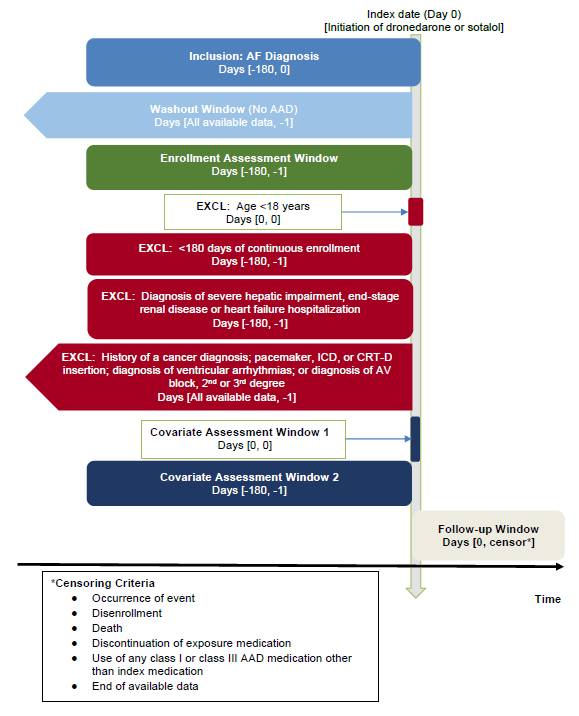


# Supplemental Figure 1. Study Design for US Population

# ADD, antiarrhythmic drug; AF, atrial fibrillation; AV, atrial ventricular; CRT-D, implantable cardiac resynchronization therapy defibrillator; ICD, implantable cardioverter-defibrillator.

# Study Period - Swedish NPR Database

As illustrated in Supplemental Figure 2, the following periods were used to identify patients in the Swedish National Patient Register (NPR) database for inclusion in the cohort:

- *Study period:* The full study time range from July 1, 2005, until the end of available data (December 31, 2015).
- *Patient identification period:* The period during which a patient’s index date could be defined based on initiation of medication between January 1, 2013, and 6 months prior to the end of available data; this allowed for a potential follow-up period of at least 6 months for each patient.
- *Index date:* The index date was indicated by the first claim for sotalol or dronedarone (i.e., the index medication) during the patient identification period following a 5-year (1,825 days) washout period for AAD use; the earliest possible index date was Jan 1, 2013.
- *Exclusion assessment period:* Three-year period (1,095 days) prior to but not including the index date, with the earliest start of the baseline period on Jan 1, 2010; this period was used to assess exclusion criteria.
- *Covariate assessment period 1:* Demographic characteristics were assessed on the index date. All other covariates, including comorbidities and concomitant therapies, were assessed in Covariate assessment period 2 (defined below).
- *Covariate assessment period 2:* Period from the start of available data up to 1 day prior to the index date.
- *Follow-up period:* Starting from the index date, the time until the earliest of a measured death event, discontinuation of the exposure medication (see Section 1.5.1), use of any class I or class III AAD other than the index medication, occurrence of the outcome, or the end of available data.


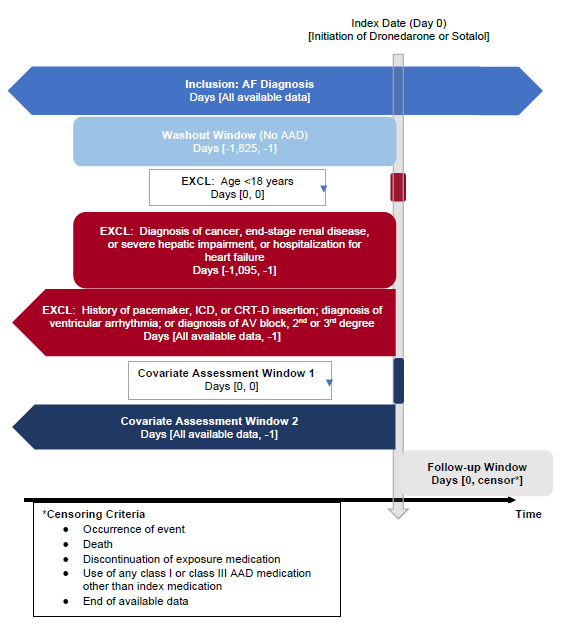


# Supplemental Figure 2. Study Design Figure for Swedish Population

# ADD, antiarrhythmic drug; AF, atrial fibrillation; AV, atrial ventricular; CRT-D, implantable cardiac resynchronization therapy defibrillator; ICD, implantable cardioverter-defibrillator.

# Inclusion Criteria

- At least one prescription claim for dronedarone or sotalol during the patient identification period from Jan 1, 2012, until 6 months prior to the end of all data; the first claim/record meeting this criterion was considered the index date, and patients were required to have no prior claims for any class I and class III AAD therapy
- At least one diagnosis of AF in the 180 days prior to or on the index date

Note: The MarketScan cohort was created from a subset of the overall MarketScan data set, defined by patients who had an AF diagnosis via the *International Classification of Diseases, Ninth Revision, Clinical Modification (ICD-9-CM)* or the *ICD-10-CM* between Dec 31, 2006, and Dec 31, 2020.

# Exclusion Criteria

Patients were excluded if they met *any* of the following criteria:

- Less than 180 days of continuous enrollment during the baseline period (Optum and MarketScan) or eligibility (VHA EHR) during the baseline period
- Age less than 18 years on index date or missing from the data set
- Diagnosis of end-stage renal disease (ESRD) including dialysis and kidney transplant, severe hepatic impairment, or hospitalization for heart failure in the baseline period, as these conditions would influence decisions around initiation of any AAD treatment
- History of a cancer diagnosis, pacemaker, implantable cardioverter-defibrillator, or cardiac resynchronization therapy defibrillator (CRT-D) at any time prior to the index date
- Diagnosis of atrioventricular (AV) block, 2nd or 3rd degree, or ventricular arrhythmias at any time prior to the index date
- Sotalol average daily dose <160 mg on index date to exclude patients who were using sotalol at a sub therapeutic dose1
- The following modifications to the study inclusion and exclusion criteria were made for the Swedish NPR database due to country-specific differences in clinical practice and data availability:
  - The patient identification period ranged from Jan 1, 2013, until June 30, 2015 (6 months prior to the end of all data)
  - Patients were required to have at least one prescription claim for dronedarone or sotalol during the patient identification period with no history of any class I or class III AAD therapy in the previous 5 years
  - No AF diagnosis was required during the 180 days prior to the index date since all patients represented in the Swedish NPR database had a hospital diagnosis for AF between July 1, 2005, and Dec 31, 2015, and because diagnoses made in primary care settings were not available in the database
  - Patients with a cancer, ESRD, or severe hepatic impairment diagnosis or heart failure hospitalization within 3 years prior to the index date were excluded
  - Patients initiating sotalol with a total daily dose less than 160 mg on the index date were not excluded due to unavailability of data on dosing in the Swedish National Prescription Registry

# Variables

# Exposure

The primary exposure was sotalol or dronedarone initiation among AAD-naïve patients. The conceptual definition for the exposure was as follows: initiation of sotalol or dronedarone with no prior use of class I or class III AADs. Operationally, exposure was defined as the first outpatient prescription claim/record for the AAD (identified by generic names or Anatomical Therapeutic Chemical [ATC] codes; see Section 3.1) with no record of other class I or class III AAD medications in the database. The date of the first claim/record for dronedarone or sotalol was the index date. Exposure to the drug started on the index date and continued until discontinuation of the index medication, with gaps of up to 30 consecutive days between prescription fills allowed, or the occurrence of another censoring event.

# Outcomes

**Primary Objective 1 and Primary Objective 2: Hospitalization for Cardiovascular Events**

The outcome for Primary Objectives 1 and 2 is cardiovascular (CV) inpatient hospitalization, which was assessed in all four databases. CV hospitalization was defined as an inpatient claim with an *ICD-9-CM*, *ICD-10-CM*, or *International Classification of Diseases, Tenth Revision, Swedish Edition (ICD-10-SE)* code (see Section 3.2 for relevant codes and validation statistics from previously published US-based studies) for one or more of the following conditions: myocardial infarction (MI), stroke, transient ischemic attack (TIA), heart failure, or AF.

# Primary Objective 3: Ventricular Arrhythmias

The outcome for Primary Objective 3, which was assessed in the four databases, is ventricular arrhythmias. Ventricular arrhythmias were defined using the following diagnoses and procedures: ventricular fibrillation and flutter, ventricular tachycardia, torsade de pointes, reentry ventricular arrhythmia, o cardiac arrest (detailed definition including relevant diagnosis codes can be found in Section 3.2). Patients with claims indicating any ventricular arrhythmia–related diagnosis recorded using *ICD-9-CM* and *ICD-10-CM* codes in the Optum, MarketScan, or VHA EHR databases or ICD-10-SE codes in the Swedish NPR database were considered to have the outcome.

# Secondary Outcomes

The secondary outcomes are as follows:

- Secondary Objective 1: All-cause mortality (defined as any death recorded in the data; VHA EHR and Swedish NPR only)
- Secondary Objective 2: Composite of ventricular arrhythmias and all-cause mortality (VHA EHR and Swedish NPR only)
- Secondary Objective 3: Bradyarrhythmias associated with syncope or pacemaker implant

Secondary Objective 3, which was assessed in all four databases, was bradyarrhythmias occurring within 5 days of syncope diagnosis or pacemaker implant, for higher specificity for clinically relevant events. Bradyarrhythmias are a composite outcome of AV block, sick sinus syndrome, bradycardia, and pacemaker implant, defined using the diagnoses and procedures summarized in Section 3.2. Patients with claims indicating bradyarrhythmia diagnoses (*ICD-9-CM* and *ICD-10-CM* in the US; *ICD-10-SE* in Sweden) or procedures [Current Procedural Terminology (CPT) in the US; KVÅ (Classification of Health Interventions) and NOMESCO (Nordic Medico-Statistical Committee) in Sweden] were considered to have the outcome.

# Covariates

Patient characteristics were identified based on data recorded during the covariate assessment period (i.e., the 180- day baseline period in the Optum, MarketScan, and VHA EHR analyses and all available data prior to index in the Swedish NPR analysis), unless otherwise noted.

# Covariates included in propensity score matching (PSM) Demographic Characteristics on Cohort Entry Date

- - - - Age in years (18-34, 35-44, 45-54, 55-64, 65-74, 75-84, 85+)
      - Sex (male, female)
      - Race/ethnicity (White, African American, Hispanic, Other/Unknown/Missing)a
      - Region (US: Northeast, Southeast, Midwest, West, Other/Unknown/Missing; Sweden: Stockholm, West, South, Other)
      - Insurance status (Commercial, Medicaid, Medicare, Other/Unknown/Missing)b

# Atrial Fibrillation Diagnosis History

- - - - Year of index date
      - Type of AF (paroxysmal, persistent, permanent, unspecified, unknown)a
      - Setting of first AF diagnosis (outpatient, inpatient, emergency department, other) during baseline perioda
      - Months between the first diagnosis of AF and the index datec

# Healthcare Utilization

- - - - Number of non–AF-related inpatient hospitalizations

# Comorbidities

- - - - Atrial flutterc
      - Cardiomyopathy or congenital anomalies of the heart
      - Chronic renal failure/renal disease
      - Congestive heart failure
      - Diabetes mellitus
      - Hypertension
      - Myocardial infarction
      - Ischemic heart disease (subsequent MI, other acute ischemic heart disease, or chronic ischemic heart disease)
      - Peripheral artery disease
      - Stroke or TIA

# Concomitant Therapies

- - - - AF ablation
      - Beta-blocking agents (any use)
      - Calcium channel blockers, dihydropyridine or non-dihydropyridine (any use)
      - Cardioversion (time since last procedure)
      - Digoxin (any use)
      - Ezetimibe (any use)
      - Ezetimibe (number of prescriptions)
      - Oral anticoagulants for thromboprophylaxis, including warfarin, apixaban, dabigatran, edoxaban, rivaroxaban (any use)
      - Oral anticoagulants for thromboprophylaxis, including warfarin, apixaban, dabigatran, edoxaban, rivaroxaban (type on index date)
      - Proprotein convertase subtilisin/kexin type 9 (PCSK9) inhibitor (any use, number of prescriptions)
      - Pulmonary medications (any use)a
      - Statins (any use)

aRace/ethnicity information was not available in the MarketScan and Swedish NPR databases. bThis variable was only assessed and included in Optum and MarketScan. cIn the Swedish NPR database, any previous diagnosis of atrial flutter or fibrillation/flutter was added to the propensity score (PS) model because subcodes for atrial flutter and AF were used inconsistently during the study period along with codes for “fibrillation-flutter,” which includes paroxysmal and permanent AF. For the Swedish NPR database, months between first diagnosis of AF and index were not included in the PSM as timing of AF diagnosis was not ascertainable in the Swedish data.

Additionally, the following information was not available or was deemed unreliable by Dr Friberg, Swedish epidemiologist, in the Swedish NPR database and is not reported: type of AF, setting of first AF diagnosis, and pulmonary medications.

# Covariates not included in PSM Demographics

- - - - Age, continuous

# Atrial Fibrillation Diagnosis History

- - - - Time from AF diagnosis to initiation of thromboprophylaxis during baseline perioda

# Index Therapy

- - - - Dronedarone co-pay on index dateb
      - Sotalol co-pay on index dateb
      - Dronedarone dosage on index date (total daily dose)b
      - Sotalol dosage on index date (total daily dose)b
      - Prescriber specialty on index date (general practitioner, cardiologist, electrophysiologist, other)c

# Healthcare Utilization

- - - - Number of cardiologist visitsa
      - Number of electrocardiograms (ECGs) performeda
      - Number of emergency department visitsa
      - Number of inpatient hospitalizations (all-cause)
      - Number of inpatient hospitalizations (AF-related)
      - Total length of inpatient hospitalizations (all-cause)
      - Total length of inpatient hospitalizations (AF-related)
      - Total length of inpatient hospitalizations (non–AF-related)
      - Number of outpatient visits

# Comorbidities

- - - - Alcohol-related diagnosesd
      - Body mass index (BMI)e
      - CHA2DS2-VASc score (used to stratify the risk of stroke in patients with AF; components listed below)
        - Congestive heart failure
        - Hypertension
        - Age ≥75 years
        - Diabetes mellitus
        - Stroke, TIA, or thromboembolic history
        - Vascular disease
        - Age 65–74 years
        - Female sex
      - Congestive heart failure
      - Chronic pulmonary disease
      - Left ventricular ejection fraction (LVEF)e
      - Hypercholesterolemia
      - Mental health disorders
      - QT prolongationa
      - Renal failuree
      - Systemic embolism
      - Valvular disease

# Concomitant Therapies

- - - - Aldosterone antagonists (any use)
      - Angiotensin-converting enzyme (ACE) (any use)
      - Angiotensin receptor blocker (ARB)
      - Angiotensin receptor-neprilysin inhibitor (ARNi) (any use)
      - Digoxin (total daily dosage)
      - Direct-acting oral anticoagulants for thromboprophylaxis, including apixaban, dabigatran, edoxaban, rivaroxaban (any use)
      - Diuretics (any use)
      - Eplerenone (any use)
      - Oral anticoagulants for thromboprophylaxis, including warfarin, apixaban, dabigatran, edoxaban, rivaroxaban (time since initiation until index in days)
      - Oral anticoagulants for thromboprophylaxis, including warfarin, apixaban, dabigatran, edoxaban, rivaroxaban (type during baseline)
      - P2Y12 inhibitors (any use)
      - Proarrhythmic medications (any use, time since last)
      - Sodium-glucose cotransporter-2 (SGLT2) inhibitors (any use)
      - Spironolactone (any use)

aThe following information was not available or was deemed unreliable by Dr Friberg, Swedish epidemiologist, in the Swedish NPR database and will not be reported: type of AF, setting of first AF diagnosis, time from AF diagnosis to initiation of thromboprophylaxis, number of cardiologist visits, number of ECGs, number of emergency department visits, QT prolongation, and pulmonary medications.

bThese variables were assessed and included in Optum, MarketScan, and VHA EHR databases. This information is not available in the Swedish NPR database.

cThese variables were assessed and included in Optum. This information is not available in the MarketScan, VHA EHR, or Swedish NPR databases.

dFactor was assessed using the Swedish NPR data only.

eFactor was assessed in VHA EHR data only.

# Data Sources and Measurement

The study population was derived from EHR data from the VA; two US commercial health insurance databases, Optum CDM DOD and Merative MarketScan; and Swedish government patient registry data. All databases used in this study contain information regarding patient demographics, diagnoses, procedures in both the inpatient and outpatient setting, and prescriptions.

Optum CDM is a single-payer insurance claims database combining data from more than 50 healthcare providers in the US and includes more than 700 hospitals and 7,000 clinics, resulting in a database of more than 180 million patients with claims records. It comprises the commercial health plan and Medicare Advantage data of a geographically diverse population, spanning all 50 states.

Merative MarketScan (formerly Truven) is a US nationwide medical and pharmacy claims database representing more than 25 million individuals enrolled in private health plans each year. The MarketScan Commercial Claims and Encounters Database contains the administrative claims of over 120 million employees and their dependents between 1995 and 2017. The MarketScan Medicare Supplemental and Coordination of Benefits (COB) Database contains the claims of over 9 million retirees with Medicare supplemental insurance paid for by employers between 1995 and 2017.

Data from the VHA EHR database are derived from the single largest integrated healthcare system in the US, the Veterans Health Administration of the Department of Veterans Affairs, or VHA. The VHA provides comprehensive health services to more than 9 million enrolled veterans of the Armed Forces at 1,250 healthcare facilities, including 172 medical centers and 1,069 outpatient sites. Veterans can be followed across the care continuum from the non-urgent outpatient clinic to the emergency department and subsequent hospitalization to post-discharge extended care in rehabilitation and nursing facilities. Mortality information is contained in the Vital Status File, available via Corporate Data Warehouse, which complements documentation in the EHR, for veterans who are enrolled in and have received care from the VHA since 1992 or have received compensation or pension benefits from the Veterans Benefit Administration since 2002. Centers for Medicare and Medicaid Services (CMS) administrative claims are available in Corporate Data Warehouse through the VA/CMS Repository.

The Swedish data contain information about all Swedish residents (including non-citizens) who received an AF diagnosis in the Swedish NPR between July 1, 2005, and Dec 31, 2015 (n=507,948). Additional hospitalization records of these patients from 1997 to 2005 were obtained from the Patient Register. Furthermore, information on prescriptions filled between 2005 and 2015 from the Prescribed Drug Register and mortality data from the Cause of Death Register for patients who died between 2005 and 2015 are included in the database.

These databases were selected based on their quality and representativeness of the US insured population and the entire Swedish population. Research using these databases has been widely published in the peer-reviewed literature on topics ranging from pharmacoepidemiology to health services research to assessment of incidence of disease to health economics, including publications in the field of cardiovascular disease.2-9 Furthermore, prior validation studies have been conducted demonstrating their reliability in identifying health statuses and diagnoses and estimating the incidence of chronic disease.10-15 For all primary endpoints, Optum, MarketScan, VHA EHR, and Swedish NPR data were used.

# Study Size

The sample size estimates below were calculated under the assumption of exponential survival. Calculations required assumptions about the average on-treatment duration of follow-up (OTDFU). Estimates were calculated based on a two-arm 1:1 PSM study with 80–90% power and a one-sided alpha equal to 0.025 and assumed an average OTDFU of 0.75 and 1.5 years.

# Primary Objective 1: Hospitalization for Cardiovascular Events

For Primary Objective 1 (CV hospitalization), the hypothesis used for the sample size estimation (H1) was that the HR for dronedarone versus sotalol will be 0.85 or less (H1: HR ≤0.85). Under these assumptions, the total sample size needed to show a statistically significant difference between dronedarone and sotalol for CV hospitalization ranged between 3,496 and 8,546 patients.

# Primary Objective 2: Ventricular Arrhythmias

Based on published literature reporting an event rate of ventricular arrhythmias of 0.0035 per patient-year,2 with the same assumptions of accrual and study duration and patient follow-up as for CV hospitalization, the total sample size needed to detect an HR of 0.70 and 0.75 with 85% power was 63,564 and 189,174, respectively.

# Data Management and Transformation

All data management and statistical analyses of the meta-analysis, as well as Optum and MarketScan databases and analyses, were conducted using the Aetion Evidence Platform™ (AEP), a software developed by Aetion, Inc. for real-world data analysis. The Optum and MarketScan data were minimally transformed at the point of connection to the AEP. The AEP has previously been accepted for use by the US Food and Drug Administration (FDA) for the RCT DUPLICATE project and the AEP is used to conduct COVID-related research in partnership with the FDA as part of a collaborative agreement established in May 2020.16,17Data management and statistical analyses of VHA data were conducted in SAS® (SAS Institute Inc., Cary, NC) using the most current version. VHA data and programs are stored (and archived) in a secure virtual workspace called VINCI, and only authorized team members have access. VHA Data Managers regularly update data and remove any duplicate records.

All data management and statistical analyses of the Swedish NPR database were conducted using Stata/MP 16.1 for Mac Intel 64-bit (Revision July 8, 2021). Sweden’s National Board of Health and Welfare is responsible for the maintenance and technical quality of the registers. The Board of Health and Welfare conducted the linkage of the three patient registers using individual civic registration numbers.

# Statistical Methods

# Main Summary Measures

Baseline characteristics were assessed for each database over the covariate assessment periods defined in Sections 1.1–1.2 and reported using descriptive statistics such as patient counts and percentages for categorical variables and means with standard deviations and medians with interquartile ranges for continuous variables. For the meta-analyses, pooled HRs and 95% confidence intervals (CIs) were estimated for each outcome.

# Main Statistical Methods

A phased approach to the analysis was implemented to ensure comparative outcomes were not assessed unless we were able to achieve baseline equipoise between the exposure groups and demonstrate mitigation of residual confounding within each analysis. Phases 1–6 were performed at the individual data set level. Phase 7 was performed at the meta-analysis level and is the focus of this article. The phases are outlined below.

# Phase 1: Cohort Selection and Baseline Characteristics

The analysis cohorts were identified using the design and algorithms detailed in Sections 1.1–1.2. Baseline characteristics of the dronedarone and sotalol groups prior to matching were examined.

# Phase 2: Propensity Score Matching and Balance Assessments

The analysis cohorts were matched using 1:1 PSM with a 0.03 caliper. Variables for inclusion in the PSM (see Section 1.5.3) were determined *a priori,* and only variables associated with the outcome were included in the PS model.18 For the two treatment cohorts to be considered exchangeable after PSM, 90% of the covariates included within the PS model had to have a standardized difference of ≤0.1 (10%) between the treatment arms and referent group.19,20 Balance had to be reached in the matched comparative cohorts in order for the study to progress to examine the negative control outcome.

# Phase 3: Negative Control Analysis to Confirm Mitigation of Residual Confounding

The matched patient groups were examined for a negative control outcome, which included a composite of hip fractures, cancer, and infections.21 In the Swedish NPR cohort, a second negative control composite was also assessed; it included incident diabetes, pneumonia, fall accidents, incident osteoarthritis, and incident chronic obstructive pulmonary disease.22 Unadjusted and PS-adjusted Cox proportional hazards models were constructed to estimate an HR (and 95% CI) comparing the rate of the negative control outcomes between dronedarone- and sotalol-treated patients. No evidence of residual confounding could be present for the study to progress to examine the study objectives and outcomes of interest (phase 4).

# Phase 4: Primary Objective 1, Hospitalization for CV Events

# In all four data sets, PS-adjusted HRs were estimated to describe rates of CV hospitalization between dronedarone- and sotalol-treated patients using Cox proportional hazards regression assuming an as-treated analysis. E-values were estimated for each effect estimate and the limits of the corresponding CIs as a part of a quantitative bias analysis.23

# Phase 5: Primary Objective 2, Ventricular Arrhythmias

As in phase 4, Cox proportional hazards regression was conducted in all four data sets using an as-treated analysis to describe PS-adjusted HRs of ventricular arrhythmias between dronedarone- and sotalol-treated patients. Adjusted HRs with 95% CIs were reported. Additionally, an E-value was estimated for the effect estimate and the limits of the corresponding CI that are closest to the null.

# Phase 6: Secondary Objective Analyses

For each secondary objective, the PS-adjusted HRs and 95% CIs were estimated in the relevant databases using Cox proportional hazards regression.

# Phase 7: Hypothesis-Testing

Hypothesis-testing was performed at the meta-analysis level for all primary objectives. Meta-analyses were performed to obtain summary estimates of effect across databases. Forest plots were used to graphically display heterogeneity between analysis-specific effect estimates for qualitative assessment. Additionally, the I2 statistic was calculated to quantify heterogeneity between the HRs estimated from separate analyses of the VHA EHR, Swedish NPR, Optum, and MarketScan databases. The I² statistic ranges from 0% to 100%, with low values suggesting low heterogeneity and values close to 100% suggesting considerable heterogeneity.24 Heterogeneity was also statistically evaluated using the Cochran Q test (with *P*<0.1 considered to be significant).25

The primary objectives were tested using a hierarchical approach beginning with CV hospitalization. The planned approach was to first assess heterogeneity across analysis-specific effect estimates for CV hospitalization. If significant heterogeneity was identified based on the Cochran Q test, a narrative review would be performed instead of proceeding with the meta-analysis. If no significant between-database heterogeneity was identified, the analysis- specific effect estimates for CV hospitalization would then be aggregated using a fixed effects model where the pooled effect would be estimated using the inverse variance of the log hazard ratios as the weight.

Finally, if a statistically significant difference in the risk of CV hospitalization was established between dronedarone and sotalol, heterogeneity between analysis-specific effect estimates for ventricular arrhythmias would be assessed. If significant heterogeneity was identified based on the Cochran Q test, a narrative review would be performed instead of proceeding with the meta-analysis. If no between- database heterogeneity was identified, the analysis-specific effect estimates for ventricular arrhythmias would then be aggregated using a fixed effects model as described for CV hospitalization.

Meta-analyses were also performed for the secondary objectives assessing the rate of bradyarrhythmias (Secondary Objective 3), overall, and separately for each component using data from the four databases, and for Secondary Objectives 1 and 2 in the VHA EHR and Swedish NPR databases. The same approach to testing of heterogeneity described for the primary objectives was used for the secondary objectives.

Meta-analysis results were reported following the Preferred Reporting Items for Systematic Reviews and Meta-Analyses (PRISMA) guidelines by presenting each analysis-specific effect estimate as well as the aggregated estimate in forest plots.24,25

# Missing Values

Missing data were quantified in terms of the number of unique patients with missing data but were not imputed. Patients with missing data were assigned to unknown categories; means and medians only included patients with at least one record for the characteristic. For variables included as matching criteria in the PS model, missing indicator variables were generated to capture missing or unknown values to retain patients in the analysis.

# Sensitivity Analyses

A series of sensitivity analyses were conducted in each database and at the meta-analysis level to assess the impact of various assumptions made in the main analysis. Unless otherwise noted, sensitivity analyses were performed for all primary and secondary study objectives, and in all four analyses.

The following sensitivity analyses were conducted:

# Duration of Follow-up

Cost and side effects may function as barriers to patients’ persistence on AAD therapy, and prior evidence suggests a higher risk of stroke shortly after AAD therapy initiation.26 Therefore, models stratified by duration of follow-up (i.e., patients with at least 180 days of follow-up, patients with at least 365 days of follow-up) were constructed for each study objective. This contrasts with the main analysis, where the minimum follow-up time required was only 1 day. Results are presented in the manuscript.

# Duration of Covariate Assessment Period

For the main analyses in the Optum, MarketScan, and VHA EHR databases, a fixed duration (180 days) prior to the index date while a patient was enrolled in the health plan was used to measure comorbidities. Connolly et al. found that if there are differences in the amount of available data prior to index between two study arms, using all available data may be more biased than a fixed-duration covariate assessment period.27 However, if the amount of baseline data available for the two arms is similar, there is typically a reduction in bias when classifying covariates using all available data prior to the index date. To assess the impact of using a fixed duration covariate assessment period versus all available data prior to index to measure comorbidities, a sensitivity analysis using all available data prior to the index date to address confounding was performed.

# Exclusion of Patients With Recent AF-Related Hospitalization

The FDA label recommends that sotalol be initiated in a facility that can provide cardiac resuscitation and continuous ECG monitoring due to the increased risk of ventricular tachycardia associated with sotalol.1 However, administration of medications in the inpatient setting is not captured in claims databases. As a result, in the primary analyses, patients enter the cohort on the initiation of an outpatient dispensed prescription of dronedarone or sotalol. Given that a subset of patients may initiate sotalol in the inpatient setting, a sensitivity analysis was performed for each primary objective whereby patients with an AF-related hospitalization within 1 week of index date were excluded from the analyses to address potential time zero selection bias. Results are presented in the manuscript.

# Intention-to-treat Analysis

An intention-to-treat (ITT) analysis was performed whereby patients were only censored upon the occurrence of the outcome, disenrollment/loss of benefits eligibility (applicable for the Optum, MarketScan, and VHA EHR databases only), measured death event, or end of available data within the database. This sensitivity analysis was performed to assess the effect of differential censoring between groups, as adherence to medication would no longer affect the follow-up time available for analysis. ITT analyses are commonly performed within randomized controlled trials; however, given the real-world nature of administrative claims and EHR data, where patients may discontinue or switch treatments for a multitude of reasons, the risk of exposure misclassification is raised.

# QT Prolongation

A sensitivity analysis of Primary Objective 3 was conducted using a composite outcome of ventricular arrhythmias or QT prolongation (see definition in Section 3.2) since QT prolongation functions as a potentially important ECG signal. This analysis was limited to the Optum, MarketScan, and VHA EHR databases since QT prolongation is not identifiable through *ICD* codes in the Swedish NPR database.

# CV Hospitalization Definition

To maximize the specificity of outcome identification, in the primary analysis, only CV-related diagnoses found in the primary diagnosis position of inpatient encounter records were considered to meet the outcome definition. To evaluate the impact of this decision and broaden the outcome definitions, a sensitivity analysis was conducted to compare results from the primary analysis defining CV-related hospitalizations using any diagnosis position.

# Use of Proarrhythmic Drugs

Literature suggests that patients with AF use some concomitant medications, including certain pulmonary medications, antidepressants, antimicrobials, and antipsychotics, that may also have proarrhythmic effects.28 Given the variety of medications for conditions of various severity included in the definition of proarrhythmic medications, propensity scores from the primary analysis were calculated without the inclusion of these factors. However, the impact of including these factors in the PS model on the estimated effect of dronedarone treatment on ventricular arrhythmia risk was investigated as a sensitivity analysis.

# Exclusion of Patients With Recent Atrial Flutter Diagnoses

For the main analyses, patients with an atrial flutter diagnosis (see Section 3.5 for operational definition) during the baseline period (i.e., 180 days prior to and not including the index date) were not excluded since atrial flutter is not a contraindication to dronedarone or sotalol. Per guidelines, patients with an atrial flutter diagnosis should be treated with right atrial isthmus ablation and not AADs, however, no differences in the risk of the study outcomes were expected. A sensitivity analysis was conducted to exclude these patients in the US study cohorts to evaluate the robustness of the main findings given that some patients with atrial flutter may be misdiagnosed with AF. This sensitivity analysis was not performed in the Swedish NPR database because subcodes for atrial flutter and AF were used inconsistently in Sweden during the study period along with codes for “fibrillation-flutter” per the guidance of Dr Friberg, Swedish epidemiologist.

# Prescriber Specialty of Index Therapy

Literature suggests that adherence to prescribing guidelines for AADs vary by specialty, with a positive association between the level of specialization in cardiac arrhythmias and both adherence to the guidelines and choice of AAD. Furthermore, there is evidence that adherence to the guidelines is associated with a lower risk of recurrent AF and AF-related hospitalizations and procedures.29 To assess any potential confounding by prescriber specialty, a sensitivity analysis was performed in Optum, given the availability of prescriber specialty in the data, for each primary objective, where prescriber specialty was included in the PS model. No meta-analysis was performed for this sensitivity analysis as it was only conducted in the Optum database.

# LVEF

LVEF is a determinant of CV safety outcomes in patients with AF. Therefore, a post hoc sensitivity analysis was performed in the VHA EHR database, given the availability of LVEF data in this database, where LVEF was included in the PS model as a categorical variable (see definition in section 3.5). No meta-analysis was performed for this sensitivity analysis as it was conducted in the VHA EHR database only.

# Inverse Probability of Censoring Weighting Analysis Methods

To account for potential informative censoring in the Optum and MarketScan analyses, a post hoc analysis was conducted. Inverse probability of censoring weights (IPCW) was implemented as defined in Young et al.30 These weights are constructed in a multistep process consisting of (1) data transformation, (2) numerator model estimation, (3) denominator model estimation, and (4) calculation of weights.

# Data Transformation

To apply the weighting strategy proposed by Young et al.,30 the data file must be expanded into a long format using time intervals. To illustrate this, assuming a 60-day interval, a censored individual in the initial data set with a total follow-up time of 65 days will have three records in the expanded data set. The first record will be at baseline (i.e., 0 days of follow-up), the second record will include the first 60 days of follow-up, and the 5 remaining days will be part of the third record. This patient will be uncensored for the first two timepoints and censored at the third row, when their follow-up ends. By doing this across all patients, the probability of an individual being censored can be estimated at different periods. To assess the sensitivity of the results to different time intervals, this approach was implemented in the analytic cohort using 4 different time intervals: (1) 1 day, (2) 7 days, (3) 15 days, and (4) 30 days.

# Variables

Every covariate used in the PS model was selected as a predictor for the censoring model. In addition, exposure was included as a predictor variable in the censoring model. The outcome variable for the censoring model was a modified censoring indicator (i.e., the censoring indicator in the long data). Since the goal of the model is to estimate the probability of informative censoring, administrative censoring reasons were counted as being “not censored” for the purpose of the censoring model. Administrative censoring reasons included fixed date for the end of study follow-up and death. As a sensitivity analysis, models that included time intervals (including quadratic and cubic terms for time) and exposure time (exposure status multiplied by time) as covariates were also considered.

# Censoring Models

To estimate the IPCW, two models were fit. The first model was used for the numerator of the weight calculation. This model estimated the probability of being censored as a function of the exposure, time intervals (including quadratic and cubic terms for time), and exposure time (exposure status multiplied by time). The model used to build the denominator was similar, but it included the additional baseline covariates that were used in the PS model.

To compute the final weights, the two censoring models were used to output a predicted probability to each observation in the long data set (i.e., the patient-specific censoring probability at each time interval). These probabilities were then subtracted from 1. The weights were constructed as the ratio of these two probabilities. The cumulative product of these weights for each person across all time intervals was then calculated to arrive at the individual’s final weight. In the above example, a patient with 65 days of follow-up would have three weights, which would be multiplied to arrive at the final weight.

# Outcome Model

The final weights were then used in a Cox proportional hazards model to estimate the effect of treatment on outcome status. Robust standard errors were calculated for this model. Four outcome models were performed in total, each with different weights from the different time interval transformations. As an additional sensitivity analysis, the models were bootstrapped to correct CIs when the proportional hazards assumption could be violated.

# Supplemental Results

# Additional Baseline Demographic and Clinical Characteristic Results

# Supplemental Table 1. Pre-matched Baseline Demographic and Clinical Characteristics Included in the Propensity Score Model

| **Variable** | **Optum** | | | **MarketScan** | | | **VHA EHR** | | | **Swedish NPR** | | |
| --- | --- | --- | --- | --- | --- | --- | --- | --- | --- | --- | --- | --- |
| **Dronedarone** | **Sotalol** | **ASD** | **Dronedarone** | **Sotalol** | **ASD** | **Dronedarone** | **Sotalol** | **ASD** | **Dronedarone** | **Sotalol** | **ASD** |
| **Number of patients** | 9,255 | 12,364 |  | 12,928 | 13,641 |  | 3,106 | 8,190 |  | 2,666 | 1,452 |  |
| **Year of index** |  |  |  |  |  |  |  |  |  |  |  |  |
| ...2010; n (%) | NA | NA | 0.204 | NA | NA | 0.156 | NA | NA | 0.157 | NA | NA | 0.324 |
| ...2011; n (%) | NA | NA |  | NA | NA |  | NA | NA |  | NA | NA |  |
| ...2012; n (%) | 1,119 (12.1%) | 981 (7.9%) |  | 2,998 (23.2%) | 2,465 (18.1%) |  | 229 (7.4%) | 836 (10.2%) |  | NA | NA |  |
| ...2013; n (%) | 992 (10.7%) | 1,026 (8.3%) |  | 2,226 (17.2%) | 2,159 (15.8%) |  | 241 (7.8%) | 779 (9.5%) |  | 956 (35.9%) | 704 (48.5%) |  |
| ...2014; n (%) | 827 (8.9%) | 916 (7.4%) |  | 1,862 (14.4%) | 1,974 (14.5%) |  | 273 (8.8%) | 841 (10.3%) |  | 1,086 (40.7%) | 567 (39.0%) |  |
| ...2015; n (%) | 805 (8.7%) | 1,027 (8.3%) |  | 1,402 (10.8%) | 1,673 (12.3%) |  | 347 (11.2%) | 886 (10.8%) |  | 624 (23.4%) | 181 (12.5%) |  |
| ...2016; n (%) | 783 (8.5%) | 1,261 (10.2%) |  | 1,284 (9.9%) | 1,619 (11.9%) |  | 425 (13.7%) | 979 (12.0%) |  | NA | NA |  |
| ...2017; n (%) | 949 (10.3%) | 1,502 (12.1%) |  | 961 (7.4%) | 1,257 (9.2%) |  | 379 (12.2%) | 1,022 (12.5%) |  | NA | NA |  |
| ...2018; n (%) | 935 (10.1%) | 1,526 (12.3%) |  | 825 (6.4%) | 978 (7.2%) |  | 415 (13.4%) | 1,021 (12.5%) |  | NA | NA |  |
| ...2019; n (%) | 964 (10.4%) | 1,536 (12.4%) |  | 785 (6.1%) | 900 (6.6%) |  | 448 (14.4%) | 1,034 (12.6%) |  | NA | NA |  |
| ...2020; n (%) | 935 (10.1%) | 1,253 (10.1%) |  | 585 (4.5%) | 616 (4.5%) |  | 349 (11.2%) | 792 (9.7%) |  | NA | NA |  |
| ...2021; n (%) | 946 (10.2%) | 1,336 (10.8%) |  | NA | NA |  | NA | NA |  | NA | NA |  |

| **Age categories, years** |  |  |  |  |  |  |  |  |  |  |  |  |
| --- | --- | --- | --- | --- | --- | --- | --- | --- | --- | --- | --- | --- |
| ...18–34; n (%) | 52 (0.6%) | 82 (0.7%) | 0.071 | 129 (1.0%) | 167 (1.2%) | 0.089 | 12 (0.39%) | 22 (0.27%) | 0.298 | 12 (0.5%) | 14 (1.0%) | 0.099 |
| ...35–44; n (%) | 187 (2.0%) | 222 (1.8%) |  | 503 (3.9%) | 526 (3.9%) |  | 33 (1.1%) | 66 (0.81%) |  | 66 (2.5%) | 45 (3.1%) |  |
| ...45–54; n (%) | 717 (7.7%) | 982 (7.9%) |  | 1,969 (15.2%) | 2,226 (16.3%) |  | 148 (4.8%) | 412 (5.0%) |  | 275 (10.3%) | 134 (9.2%) |  |
| ...55–64; n (%) | 1,821 (19.7%) | 2,643 (21.4%) |  | 5,474 (42.3%) | 6,061 (44.4%) |  | 479 (15.4%) | 1,776 (21.7%) |  | 734 (27.5%) | 396 (27.3%) |  |
| ...65–74; n (%) | 3,654 (39.5%) | 4,942 (40.0%) |  | 2,565 (19.8%) | 2,644 (19.4%) |  | 1,380 (44.4%) | 3,951 (48.3%) |  | 1,116 (41.9%) | 581 (40.0%) |  |
| ...75–84; n (%) | 2,365 (25.6%) | 3,009 (24.3%) |  | 1,811 (14.0%) | 1,630 (11.9%) |  | 760 (24.5%) | 1,570 (19.2%) |  | 427 (16.0%) | 263 (18.1%) |  |
| ...≥85; n (%) | 459 (5.0%) | 484 (3.9%) |  | 477 (3.7%) | 387 (2.8%) |  | 294 (9.5%) | 393 (4.8%) |  | 36 (1.4%) | 19 (1.3%) |  |
| **Sex categories** |  |  |  |  |  |  |  |  |  |  |  |  |
| ...Male; n (%) | 4,965 (53.6%) | 7,017 (56.8%) | 0.064 | 7,959 (61.6%) | 8,710 (63.9%) | 0.047 | 3,030 (97.5%) | 8,012 (97.8%) | 0.018 | 1,507 (56.5%) | 900 (62.0%) | 0.111 |
| ...Female; n (%) | 4,290 (46.4%) | 5,346 (43.2%) |  | 4,969 (38.4%) | 4,931 (36.1%) |  | 76 (2.5%) | 178 (2.2%) |  | 1,159 (43.5%) | 552 (38.0%) |  |
| ...Missing or Unknown; n (%) | 0 (0.0%) | 1 (0.0%) |  | 0 (0.0%) | 0 (0.0%) |  | 0 (0.0%) | 0 (0.0%) |  | NA | NA |  |
| **Race/ethnicity** |  |  |  |  |  |  |  |  |  |  |  |  |
| ...White; n (%) | 7,149 (77.2%) | 9,734 (78.7%) | 0.067 | NA | NA | NA | 2,857 (92.0%) | 7,459 (91.4%) | 0.064 | NA | NA | NA |
| ...African American; n (%) | 672 (7.3%) | 989 (8.0%) |  | NA | NA |  | 176 (5.7%) | 490 (6.0%) |  | NA | NA |  |
| ...Hispanic; n (%) | 748 (8.1%) | 848 (6.9%) |  | NA | NA |  | 3 (0.10%) | 12 (0.15%) |  | NA | NA |  |
| ...Other/Unknown/Missing;  n (%) | 686 (7.4%) | 793 (6.4%) |  | NA | NA |  | 70 (2.3%) | 229 (2.8%) |  | NA | NA |  |
| Region – US |  |  |  |  |  |  |  |  |  |  |  |  |
| ...Northeast; n (%) | 1,146 (12.4%) | 966 (7.8%) | 0.213 | 2,823 (21.8%) | 2,265 (16.6%) | 0.175 | 447 (14.4%) | 1,357 (16.6%) | 0.14 | NA | NA | NA |
| ...Midwest; n (%) | 1,699 (18.4%) | 3,128 (25.3%) |  | 2,616 (20.2%) | 3,552 (26.0%) |  | 1,001 (32.2%) | 2,675 (32.7%) |  | NA | NA |  |
| ...Southeast; n (%) | 4,739 (51.2%) | 5,959 (48.2%) |  | 5,990 (46.3%) | 6,103 (44.7%) |  | 1,246 (40.1%) | 3,281 (40.1%) |  | NA | NA |  |

| ...West; n (%) | 1,666 (18.0%) | 2,305 (18.6%) |  | 1,365 (10.6%) | 1,558 (11.4%) |  | 408 (13.1%) | 876 (10.7%) |  | NA | NA |  |
| --- | --- | --- | --- | --- | --- | --- | --- | --- | --- | --- | --- | --- |
| ...Other/Unknown; n (%) | 5 (0.1%) | 6 (0.0%) |  | 134 (1.0%) | 163 (1.2%) |  | 4 (0.13%) | 1 (0.01%) |  | NA | NA |  |
| **Region – Sweden** |  |  |  |  |  |  |  |  |  |  |  |  |
| ...Stockholm; n (%) | NA | NA | NA | NA | NA | NA | NA | NA | NA | 484 (18.2%) | 271 (18.7%) | 0.294 |
| ...West; n (%) | NA | NA |  | NA | NA |  | NA | NA |  | 291 (10.9%) | 516 (35.5%) |  |
| ...South; n (%) | NA | NA |  | NA | NA |  | NA | NA |  | 652 (25.5%) | 110 (7.6%) |  |
| ...Other; n (%) | NA | NA |  | NA | NA |  | NA | NA |  | 1,239 (46.5%) | 555 (38.2%) |  |
| **Insurance status** |  |  |  |  |  |  |  |  |  |  |  |  |
| ...Commercial; n (%) | 3,012 (32.5%) | 4,022 (32.5%) | 0 | 8,045 (62.2%) | 8,953 (65.6%) | 0.071 | NA | NA | NA | NA | NA | NA |
| ...Medicaid; n (%) | 0 (0.0%) | 0 (0.0%) |  | 0 (0.0%) | 0 (0.0%) |  | NA | NA |  | NA | NA |  |
| ...Medicare; n (%) | 6,243 (67.5%) | 8,342 (67.5%) |  | 4,883 (37.8%) | 4,688 (34.4%) |  | NA | NA |  | NA | NA |  |
| ...Other/Unknown/Missing;  n (%) | 0 (0.0%) | 0 (0.0%) |  | 0 (0.0%) | 0 (0.0%) |  | NA | NA |  | NA | NA |  |
| **Type of AF** |  |  |  |  |  |  |  |  |  |  |  |  |
| ...Unknown AF (*ICD-9* only);  n (%) | 3,532 (38.2%) | 3,678 (29.7%) | 0.225 | 8,164 (63.1%) | 7,927 (58.1%) | 0.121 | 1,017 (32.7%) | 3,145 (38.4%) | 0.26 | NA | NA | NA |
| ...Unspecified AF; n (%) | 761 (8.2%) | 1,250 (10.1%) |  | 721 (5.6%) | 924 (6.8%) |  | 605 (19.5%) | 1,837 (22.4%) |  | NA | NA |  |
| ...Paroxysmal AF; n (%) | 3,221 (34.8%) | 4,184 (33.8%) |  | 2,577 (19.9%) | 2,840 (20.8%) |  | 947 (30.5%) | 1,593 (19.5%) |  | NA | NA |  |
| ...Persistent AF; n (%) | 1,055 (11.4%) | 1,962 (15.9%) |  | 950 (7.3%) | 1,338 (9.8%) |  | 204 (6.6%) | 643 (7.9%) |  | NA | NA |  |
| ...Permanent AF; n (%) | 686 (7.4%) | 1,290 (10.4%) |  | 516 (4.0%) | 612 (4.5%) |  | 333 (10.7%) | 972 (11.9%) |  | NA | NA |  |
| **Setting of first AF diagnosis**  **during baseline** |  |  |  |  |  |  |  |  |  |  |  |  |
| ...Inpatient; n (%) | 1,679 (18.1%) | 2,923 (23.6%) | 0.141 | 2,592 (20.0%) | 3,642 (26.7%) | 0.19 | 268 (8.6%) | 1,150 (14.0%) | 0.158 | NA | NA | NA |
| ...ED; n (%) | 1,229 (13.3%) | 1,452 (11.7%) |  | 1,650 (12.8%) | 1,481 (10.9%) |  | 166 (5.3%) | 439 (5.4%) |  | NA | NA |  |

| ...Outpatient; n (%) | 6,045 (65.3%) | 7,536 (61.0%) |  | 8,247 (63.8%) | 7,822 (57.3%) |  | 2,672 (86.0%) | 6,601 (80.6%) |  | NA | NA |  |
| --- | --- | --- | --- | --- | --- | --- | --- | --- | --- | --- | --- | --- |
| ...Other; n (%) | 287 (3.1%) | 423 (3.4%) |  | 426 (3.3%) | 679 (5.0%) |  | NA | NA |  | NA | NA |  |
| ...Missing; n (%) | 15 (0.2%) | 30 (0.2%) |  | 13 (0.1%) | 17 (0.1%) |  | NA | NA |  | NA | NA |  |
| **Months between the first diagnosis of AF and the index**  **date** |  |  |  |  |  |  |  |  |  |  |  |  |
| ...Mean (SD) | 2.20 (2.02) | 2.13 (2.07) | 0.035 | 1.92 (1.93) | 1.83 (1.96) | 0.044 | 2.24 (1.97) | 2.22 (2.11) | 0.008 | NA | NA | NA |
| ...Median (IQR) | 1.55 (0.26–  4.08) | 1.38 (0.16–  4.04) |  | 1.22 (0.16–  3.42) | 0.99 (0.13–3.32) |  | 2 (1–4) | 2 (0–4) |  | NA | NA |  |
| **Ablation procedure; n (%)** | 29 (0.3%) | 69 (0.6%) | 0.037 | 31 (0.2%) | 89 (0.7%) | 0.062 | 15 (0.5%) | 30 (0.4%) | 0.018 | 57 (2.2%) | 35 (2.4%) | 0.018 |
| **Cardiomyopathy or congenital anomalies of the**  **heart; n (%)** | 1,277 (13.8%) | 2,380 (19.2%) | 0.147 | 1,406 (10.9%) | 2,009 (14.7%) | 0.115 | 192 (6.2%) | 688 (8.4%) | 0.085 | 46 (1.7%) | 44 (3.0%) | 0.085 |
| **Chronic renal disease; n (%)** | 1,417 (15.3%) | 1,736 (14.0%) | 0.036 | 847 (6.6%) | 765 (5.6%) | 0.039 | 274 (8.8%) | 442 (5.4%) | 0.134 | 37 (1.4%) | 26 (1.8%) | 0.032 |
| **Congestive heart failure;  n (%)** | 1,579 (17.1%) | 2,944 (23.8%) | 0.168 | 1,369 (10.6%) | 2,233 (16.4%) | 0.17 | 311 (10.0%) | 1,341 (16.4%) | 0.189 | 185 (6.9%) | 131 (9.0%) | 0.077 |
| **Diabetes mellitus; n (%)** | 2,381 (25.7%) | 3,645 (29.5%) | 0.084 | 2,649 (20.5%) | 3,303 (24.2%) | 0.089 | 881 (28.4%) | 2,873 (35.1%) | 0.145 | 291 (10.9%) | 169 (11.6%) | 0.023 |
| **Hypertension; n (%)** | 7,067 (76.4%) | 9,844 (79.6%) | 0.079 | 8,190 (63.4%) | 9,376 (68.7%) | 0.114 | 1,997 (64.3%) | 5,637 (68.8%) | 0.096 | 1,478 (55.4%) | 826 (56.9%) | 0.029 |
| **Ischemic heart disease (subsequent MI, other acute ischemic heart disease, or chronic ischemic heart**  **disease); n (%)** | 3,516 (38.0%) | 5,152 (41.7%) | 0.075 | 3,714 (28.7%) | 4,526 (33.2%) | 0.096 | 1,270 (40.9%) | 3,416 (41.7%) | 0.017 | 206 (7.7%) | 159 (11.0%) | 0.111 |
| **Myocardial infarction; n (%)** | 411 (4.4%) | 775 (6.3%) | 0.081 | 415 (3.2%) | 597 (4.4%) | 0.061 | 41 (1.3%) | 220 (2.7%) | 0.098 | 198 (7.4%) | 165 (11.4%) | 0.135 |
| **Number of inpatient hospitalizations – non–AF-**  **related** |  |  |  |  |  |  |  |  |  |  |  |  |
| …Mean (SD) | 0.23 (0.54) | 0.30 (0.61) | 0.112 | 0.19 (0.47) | 0.26 (0.55) | 0.139 | 0.28 (0.69) | 0.55 (0.90) | 0.33 | 0.15 (0.50) | 0.53 (1.02) | 0.477 |
| ...Median (IQR) | 0 (0–0) | 0 (0–0) |  | 0 (0–0) | 0 (0–0) |  | 0 (0–0) | 0 (0–1) |  | 0 (0–0) | 0 (0–0) |  |

| **Peripheral artery disease;  n (%)** | 618 (6.7%) | 883 (7.1%) | 0.018 | 396 (3.1%) | 440 (3.2%) | 0.009 | 143 (4.6%) | 386 (4.7%) | 0.005 | 87 (3.3%) | 64 (4.4%) | 0.059 |
| --- | --- | --- | --- | --- | --- | --- | --- | --- | --- | --- | --- | --- |
| **Stroke or TIA; n (%)** | 786 (8.5%) | 982 (7.9%) | 0.02 | 774 (6.0%) | 753 (5.5%) | 0.02 | 89 (2.9%) | 274 (3.4%) | 0.028 | NA | NA | NA |
| **Stroke; n (%)** | NA | NA | NA | NA | NA | NA | NA | NA | NA | 160 (6.0%) | 85 (5.9%) | 0.006 |
| **TIA; n (%)** | NA | NA | NA | NA | NA | NA | NA | NA | NA | 110 (4.1%) | 66 (4.5%) | 0.021 |
| **Time since last cardioversion** |  |  |  |  |  |  |  |  |  |  |  |  |
| ...No previous cardioversion;  n (%) | 7,454 (80.5%) | 9,198 (74.4%) | 0.171 | 10,254 (79.3%) | 9,905 (72.6%) | 0.182 | 2,943 (94.8%) | 7,296 (89.1%) | 0.209 | 2,021 (75.8%) | 1,061 (73.1%) | 0.074 |
| ...Cardioversion within previous  2 days; n (%) | 412 (4.5%) | 983 (8.0%) |  | 710 (5.5%) | 1,320 (9.7%) |  | 32 (1.0%) | 328 (4.0%) |  | 127 (4.8%) | 61 (4.2%) |  |
| ...Cardioversion more than  2 days before; n (%) | 1,389 (15.0%) | 2,183 (17.7%) |  | 1,964 (15.2%) | 2,416 (17.7%) |  | 138 (4.4%) | 652 (8.0%) |  | 518 (19.4%) | 330 (22.7%) |  |
| **Apixaban on index; n (%)** | 2,556 (27.6%) | 3,070 (24.8%) | 0.063 | 2,480 (19.2%) | 2,309 (16.9%) | 0.059 | 153 (4.9%) | 417 (5.1%) | 0.007 | 189 (7.1%) | 43 (3.0%) | 0.190 |
| **Rivaroxaban on index; n (%)** | 1,483 (16.0%) | 1,743 (14.1%) | 0.054 | 2,611 (20.2%) | 2,463 (18.1%) | 0.054 | 81 (2.6%) | 234 (2.9%) | 0.015 | 35 (1.3%) | 19 (1.3%) | 0.004 |
| **Dabigatran etexilate mesylate**  **on index; n (%)** | 390 (4.2%) | 397 (3.2%) | 0.053 | 1,143 (8.8%) | 1,027 (7.5%) | 0.048 | 41 (1.3%) | 208 (2.5%) | 0.089 | 31 (1.2%) | 58 (4.0%) | 0.179 |
| **Edoxaban tosylate on index;  n (%)** | 9 (0.1%) | 10 (0.1%) | 0.005 | 17 (0.1%) | 13 (0.1%) | 0.011 | 7 (0.07%) | 3 (0.1%) | 0.009 | NA | NA | NA |
| **Warfarin sodium on index;  n (%)** | 1,006 (10.9%) | 1,615 (13.1%) | 0.068 | 1,419 (11.0%) | 1,915 (14.0%) | 0.093 | 62 (2.0%) | 501 (6.1%) | 0.21 | 304 (11.4%) | 197 (13.6%) | 0.066 |
| **Anticoagulants during**  **baseline; n (%)** | 4,945 (53.4%) | 6,040 (48.9%) | 0.092 | 6,175 (47.8%) | 5,985 (43.9%) | 0.078 | 1,654 (53.3%) | 4,178 (51.0%) | 0.045 | 2,209 (82.9%) | 1,041 (71.7%) | 0.269 |
| **Digoxin; n (%)** | 543 (5.9%) | 771 (6.2%) | 0.015 | 890 (6.9%) | 938 (6.9%) | 0 | 132 (4.3%) | 465 (5.7%) | 0.066 | 260 (9.8%) | 129 (8.9%) | 0.030 |
| **Beta-blocking agents; n (%)** | 5,947 (64.3%) | 7,719 (62.4%) | 0.038 | 7,961 (61.6%) | 8,272 (60.6%) | 0.019 | 1,531 (49.3%) | 3,897 (47.6%) | 0.034 | 2,407 (90.2%) | 1,187 (81.7%) | 0.248 |
| **Calcium channel blockers;  n (%)** | 3,395 (36.7%) | 4,539 (36.7%) | 0.001 | 4,521 (35.0%) | 4,709 (34.5%) | 0.009 | 862 (27.8%) | 2,354 (28.7%) | 0.022 | 628 (23.6%) | 373 (25.7%) | 0.050 |
| **Ezetimibe; n (%)** | 278 (3.0%) | 345 (2.8%) | 0.013 | 500 (3.9%) | 437 (3.2%) | 0.036 | 21 (0.7%) | 72 (0.9%) | 0.023 | 34 (1.3%) | 13 (0.9%) | 0.037 |
| **Ezetimibe – number of**  **prescriptions** |  |  |  |  |  |  |  |  |  |  |  |  |
| …Mean (SD) | 0.08 (0.59) | 0.07 (0.52) | 0.02 | 0.09 (0.53) | 0.08 (0.53) | 0.016 | 0.02 (0.25) | 0.02 (0.24) | 0.023 | 1.79 (0.64) | 1.77 (1.17) | 0.026 |

| ...Median (IQR) | 0 (0–0) | 0 (0–0) |  | 0 (0–0) | 0 (0–0) |  | 0 (0–0) | 0 (0–0) |  | 2 (1–2) | 1 (1–2) |  |
| --- | --- | --- | --- | --- | --- | --- | --- | --- | --- | --- | --- | --- |
| **Statins; n (%)** | 4,851 (52.4%) | 6,416 (51.9%) | 0.01 | 5,903 (45.7%) | 6,340 (46.5%) | 0.016 | 1,711 (55.1%) | 4,673 (57.1%) | 0.04 | 825 (30.9) | 487 (33.5) | 0.056 |
| **PCSK9 inhibitor; n (%)** | 24 (0.3%) | 25 (0.2%) | 0.012 | 4 (0.0%) | 16 (0.1%) | 0.032 | 1 (0.03%) | 5 (0.06%) | 0.001 | NA | NA | NA |
| **PCSK9 inhibitor – number of**  **prescriptions** |  |  |  |  |  |  |  |  |  |  |  |  |
| ...Mean (SD) | 0.01 (0.17) | 0.01 (0.16) | 0.007 | 0.00 (0.09) | 0.00 (0.15) | 0.024 | 0.001 (0.07) | 0.001 (0.06) | 0.013 | NA | NA | NA |
| …Median (IQR) | 0 (0–0) | 0 (0–0) |  | 0 (0–0) | 0 (0–0) |  | 0 (0–0) | 0 (0–0) |  | NA | NA | NA |
| **Pulmonary medications;  n (%)** | 1,668 (18.0%) | 2,140 (17.3%) | 0.019 | 1,973 (15.3%) | 2,016 (14.8%) | 0.014 | 686 (22.1%) | 1,733 (21.2%) | 0.023 | NA | NA | NA |
| **Atrial flutter or**  **fibrillation/flutter; n (%)** | NA | NA | NA | NA | NA | NA | NA | NA | NA | 223 (8.4%) | 126 (8.7%) | 0.011 |

AF=atrial fibrillation; ASD=absolute standardized difference; ED=emergency department; *ICD-9=International Classification of Diseases, Ninth Revision*; IQR=interquartile range; MarketScan=Merative MarketScan database; MI=myocardial infarction; NA= not assessed; NPR=National Patient Register; Optum=Optum CDM DOD database; PCSK9=proprotein convertase subtilisin/kexin type 9; SD=standard deviation; TIA=transient ischemic attack; VHA EHR=Veterans Health Administration Electronic Health Record.

# Supplemental Table 2. Pre-matched Baseline Demographic and Clinical Characteristics Not Included in the Propensity Score Model

| **Variable** | **Optum** | | | **MarketScan** | | | **VHA EHR** | | | **Swedish NPR** | | |
| --- | --- | --- | --- | --- | --- | --- | --- | --- | --- | --- | --- | --- |
| **Dronedarone** | **Sotalol** | **ASD** | **Dronedarone** | **Sotalol** | **ASD** | **Dronedarone** | **Sotalol** | **ASD** | **Dronedarone** | **Sotalol** | **ASD** |
| **Number of patients** | 9,255 | 12,364 | – | 12,928 | 13,641 | – | 3,106 | 8,190 |  | 2,666 | 1,452 |  |
| **Age, continuous, years** |  |  |  |  |  |  |  |  |  |  |  |  |
| ...Mean (SD) | 68.56 (10.76) | 68.11 (10.53) | 0.043 | 63.01 (11.54) | 62.19 (11.17) | 0.072 | 70.9 (10.2) | 68.8 (8.2) | 0.213 | 65.5 (9.9) | 65.8 (10.6) | 0.022 |
| ...Median (IQR) | 69 (62–76) | 69 (62–76) |  | 62 (56–70) | 62 (56–69) |  | 71 (65–78) | 69 (64–74) |  | 67 (60–72) | 67 (60–73) |  |
| **Time from AF diagnosis to initiation of thromboprophylaxis during**  **baseline period, days** |  |  |  |  |  |  |  |  |  |  |  |  |
| ...Mean (SD) | -2.29 (61.43) | -4.53 (62.35) | 0.036 | -10.28 (62.22) | -11.72 (65.78) | 0.022 | 0.66 (52.59) | -2.48 (52.41) | 0.06 | NA | NA | NA |
| ...Median (IQR) | 1 (-12–15) | 1 (-14–12) |  | 0 (-19–9) | 0 (-25–10) |  | 3 (0–15) | 3 (-5–16) |  | NA | NA |  |
| ...Missing; n (%) | 3,216 (34.7%) | 4,644 (37.6%) |  | 6,753 (52.2%) | 7,656 (56.1%) |  | 1,452 (46.7%) | 4,012 (49.0%) |  | NA | NA |  |
| **CHA2DS2-VASc score -  180-day lookback** |  |  |  |  |  |  |  |  |  |  |  |  |
| ...Mean (SD) | 3.13 (1.83) | 3.20 (1.80) | 0.036 | 2.26 (1.78) | 2.36 (1.77) | 0.054 | 2.00 (1.29) | 2.12 (1.41) | 0.078 | 1.80 (1.35) | 1.89 (1.37) | 0.063 |
| ...Median (IQR) | 3 (2–4) | 3 (2–4) |  | 2 (1–3) | 2 (1–3) |  | 2 (1–3) | 2 (1–3) |  | 2 (1–3) | 2 (1–3) |  |
| **Chronic pulmonary disease;  n (%)** | 2,061 (22.3%) | 2,908 (23.5%) | 0.03 | 1,921 (14.9%) | 2,025 (14.8%) | 0 | 607 (19.5%) | 1,830 (22.3%) | 0.069 | 249 (9.3%) | 124 (8.5%) | 0.028 |
| **Hypercholesterolemia; n (%)** | 2,024 (21.9%) | 2,514 (20.3%) | 0.038 | 2,173 (16.8%) | 2,195 (16.1%) | 0.019 | 122 (3.9%) | 417 (5.1%) | 0.056 | 121 (4.5%) | 83 (5.7%) | 0.053 |
| **Mental health disorders;  n (%)** | 2,795 (30.2%) | 4,159 (33.6%) | 0.074 | 2,776 (21.5%) | 3,318 (24.3%) | 0.068 | 929 (29.9%) | 2,968 (36.2%) | 0.135 | 319 (12.0%) | 176 (12.1%) | 0.005 |

| **Dronedarone co-pay on index**  **date** |  |  |  |  |  |  |  |  |  |  |  |  |
| --- | --- | --- | --- | --- | --- | --- | --- | --- | --- | --- | --- | --- |
| ...Mean (SD) | 68.03 (83.23) | NA | NA | 49.32 (56.09) | NA | NA | NA | NA | NA | NA | NA | NA |
| ...Median (IQR) | 45.00 (30.00–  70.00) | NA |  | 40.00 (19.27–  64.00) | NA |  | NA | NA |  | NA | NA |  |
| …Missing; n (%) | 0 (0.0%) | NA |  | 1,370 (10.6%) | NA |  | NA | NA |  | NA | NA |  |
| **Sotalol co-pay on index date** |  |  |  |  |  |  |  |  |  |  |  |  |
| ...Mean (SD) | NA | 9.89 (9.36) | NA | NA | 6.04 (6.63) | NA | NA | NA | NA | NA | NA | NA |
| ...Median (IQR) | NA | 8 (4–12) |  | NA | 5 (0–10) |  | NA | NA |  | NA | NA |  |
| …Missing; n (%) | NA | 0 (0.0%) |  | NA | 1,516 (11.1%) |  | NA | NA |  | NA | NA |  |
| **Dronedarone total daily dose**  **on index date, mg** |  |  |  |  |  |  |  |  |  |  |  |  |
| ...Mean (SD) | 792.33 (72.89) | NA | NA | 1,027.72  (3,011.30) | NA | NA | 800(0) | NA | NA | NA | NA | NA |
| ...Median (IQR) | 800.00 (800.00–800.00) | NA |  | 800.00  (800.00–800.00) | NA |  | 800.00  (800.00–800.00) | NA |  | NA | NA |  |
| …Missing; n (%) | 0 (0.0%) | NA |  | 0 (0.0%) | NA |  | 0 (0.0%) | NA |  | NA | NA |  |
| **Sotalol total daily dose on**  **index date, mg** |  |  |  |  |  |  |  |  |  |  |  |  |
| ...Mean (SD) | NA | 176.63 (42.92) | NA | NA | 269.08 (839.09) | NA | NA | 191.6 (50.9) | NA | NA | NA | NA |
| ...Median (IQR) | NA | 160.00  (160.00–160.00) |  | NA | 160.00  (160.00–160.00) |  | NA | 160.00  (160.00–240.00) |  | NA | NA |  |
| …Missing; n (%) | NA | 0 (0.0%) |  | NA | 0 (0.0%) |  | NA | 0 (0.0%) |  | NA | NA |  |

| **Prescriber specialty of index**  **prescription** |  |  |  |  |  |  |  |  |  |  |  |  |
| --- | --- | --- | --- | --- | --- | --- | --- | --- | --- | --- | --- | --- |
| …General practitioner; n (%) | 2,012 (21.7%) | 3,837 (31.0%) | 0.212 | NA | NA | NA | NA | NA | NA | NA | NA | NA |
| …Cardiologist; n (%) | 5,944 (64.2%) | 6,532 (52.8%) | 0.233 | NA | NA | NA | NA | NA | NA | NA | NA | NA |
| …Electrophysiologist; n (%) | 1,515 (16.4%) | 1,788 (14.5%) | 0.053 | NA | NA | NA | NA | NA | NA | NA | NA | NA |
| …Other/Unknown/Missing;  n (%) | 1,301 (14.1%) | 1,999 (16.2%) | 0.059 | NA | NA | NA | NA | NA | NA | NA | NA | NA |
| **Number of cardiologist visits**  **during the baseline period** |  |  |  |  |  |  |  |  |  |  |  |  |
| ...Mean (SD) | 3.82 (3.54) | 4.20 (3.83) | 0.102 | 3.22 (3.27) | 3.52 (3.72) | 0.087 | 4.69 (4.05) | 4.79 (4.70) | 0.023 | NA | NA | NA |
| ...Median (IQR) | 3 (1–5) | 3 (1–6) |  | 3 (1–5) | 3 (1–5) |  | 3 (2–6) | 3 (1–7) |  | NA | NA |  |
| **Number of ECG procedures**  **performed in last 180 days** |  |  |  |  |  |  |  |  |  |  |  |  |
| ...Mean (SD) | 2.74 (2.12) | 2.92 (2.38) | 0.082 | 2.71 (2.07) | 3.00 (2.48) | 0.128 | 1.38 (1.73) | 1.74 (2.50) | 0.167 | NA | NA | NA |
| ...Median (IQR) | 2 (1–4) | 2 (1–4) |  | 2 (1–4) | 2 (1–4) |  | 1 (0–2) | 1 (0–2) |  | NA | NA |  |
| **Number of emergency department**  **visits** |  |  |  |  |  |  |  |  |  |  |  |  |
| ...Mean (SD) | 1.00 (1.65) | 1.05 (1.59) | 0.032 | 0.55 (0.99) | 0.51 (0.94) | 0.036 | 0.75 (1.85) | 0.91 (1.96) | 0.083 | NA | NA | NA |
| ...Median (IQR) | 1 (0–1) | 1 (0–1) |  | 0 (0–1) | 0 (0–1) |  | 0 (0–0) | 0 (0–1) |  | NA | NA |  |
| **Number of inpatient**  **hospitalizations** |  |  |  |  |  |  |  |  |  |  |  |  |

| ...Mean (SD) | 0.41 (0.65) | 0.65 (0.75) | 0.342 | 0.40 (0.61) | 0.68 (0.70) | 0.413 | 0.28 (0.70) | 0.55 (0.90) | 0.33 | 0.61 (0.94) | 1.08 (1.19) | 0.437 |
| --- | --- | --- | --- | --- | --- | --- | --- | --- | --- | --- | --- | --- |
| ...Median (IQR) | 0 (0–1) | 1 (0–1) |  | 0 (0–1) | 1 (0–1) |  | 0 (0–0) | 0 (0–1) |  | 0 (0–1) | 1 (0–2) |  |
| **Number of inpatient**  **hospitalizations - AF-related** |  |  |  |  |  |  |  |  |  |  |  |  |
| ...Mean (SD) | 0.18 (0.41) | 0.36 (0.54) | 0.367 | 0.22 (0.44) | 0.42 (0.56) | 0.399 | 0.15 (0.43) | 0.33 (0.62) | 0.337 | 0.46 (0.75) | 0.54 (0.79) | 0.109 |
| ...Median (IQR) | 0 (0–0) | 0 (0–1) |  | 0 (0–0) | 0 (0–1) |  | 0 (0–0) | 0 (0–1) |  | 0 (0–1) | 0 (0–1) |  |
| **Total days of hospitalization -**  **any** |  |  |  |  |  |  |  |  |  |  |  |  |
| ...Mean (SD) | 1.99 (5.08) | 2.83 (4.93) | 0.168 | 1.60 (4.06) | 2.72 (4.70) | 0.256 | 1.33 (11.13) | 2.63 (18.6) | 0.085 | 1.56 (4.08) | 4.70 (8.49) | 0.471 |
| ...Median (IQR) | 0 (0–2) | 1 (0–4) |  | 0 (0–2) | 2 (0–4) |  | 0 (0–0) | 0 (0–3) |  | 0 (0–2) | 2 (0–5) |  |
| **Total days of hospitalization -**  **AF-related** |  |  |  |  |  |  |  |  |  |  |  |  |
| ...Mean (SD) | 0.55 (1.56) | 1.13 (2.06) | 0.314 | 0.59 (1.57) | 1.26 (2.06) | 0.366 | 0.37 (1.54) | 1.07 (4.97) | 0.19 | 0.94 (2.04) | 1.33 (2.40) | 0.172 |
| ...Median (IQR) | 0 (0–0) | 0 (0–2) |  | 0 (0–0) | 0 (0–2) |  | 0 (0–0) | 0 (0–1) |  | 0 (0–1) | 0 (0–2) |  |
| **Total days of hospitalization -**  **non–AF-related** |  |  |  |  |  |  |  |  |  |  |  |  |
| ...Mean (SD) | 1.44 (4.88) | 1.71 (4.62) | 0.056 | 1.01 (3.80) | 1.47 (4.46) | 0.11 | 1.32 (11.13) | 2.62 (18.6) | 0.085 | 0.62 (3.47) | 3.37 (8.49) | 0.425 |
| ...Median (IQR) | 0 (0–0) | 0 (0–0) |  | 0 (0–0) | 0 (0–0) |  | 0 (0–0) | 0 (0–3) |  | 0 (0–0) | 0 (0–1) |  |
| **Number of outpatient visits** |  |  |  |  |  |  |  |  |  |  |  |  |
| ...Mean (SD) | 12.69 (9.85) | 12.13 (10.10) | 0.056 | 11.72 (9.14) | 11.32 (9.27) | 0.043 | 17.94 (15.18) | 18.96 (16.00) | 0.065 | 2.80 (2.54) | 2.39 (2.35) | 0.168 |
| ...Median (IQR) | 10 (6–16) | 10 (5–16) |  | 9 (5–15) | 9 (5–15) |  | 13 (8–23) | 15 (8–26) |  | 2 (1–4) | 2 (1–3) |  |
| **QT prolongation; n (%)** | 0 (0.0%) | 0 (0.0%) | - | 0 (0.0%) | 0 (0.0%) | - | 0 (0.0%) | 0 (0.0%) | 0 | NA | NA | NA |
| **Systemic embolism; n (%)** | 22 (0.2%) | 41 (0.3%) | 0.018 | 30 (0.2%) | 33 (0.2%) | 0.002 | 8 (0.26%) | 14 (0.17%) | 0.019 | 5 (0.2%) | 6 (0.4%) | 0.041 |
| **Valvular disease; n (%)** | 3,145 (34.0%) | 4,414 (35.7%) | 0.036 | 3,527 (27.3%) | 4,102 (30.1%) | 0.062 | 231 (7.4%) | 678 (8.3%) | 0.031 | 31 (1.2%) | 24 (1.7%) | 0.042 |
| **Cardioversion; n (%)** | 1,801 (19.5%) | 3,168 (25.6%) | 0.148 | 2,674 (20.7%) | 3,736 (27.4%) | 0.157 | 163 (5.3%) | 894 (10.9%) | 0.209 | 645 (24.2%) | 391 (26.9%) | 0.063 |

| **Oral anticoagulants for thromboprophylaxis: time since initiation until index,**  **days** |  |  |  |  |  |  |  |  |  |  |  |  |
| --- | --- | --- | --- | --- | --- | --- | --- | --- | --- | --- | --- | --- |
| ...Mean (SD) | 97.48 (70.40) | 104.23 (69.40) | 0.097 | 89.95 (68.56) | 93.22 (69.13) | 0.047 | 86.62 (61.00) | 98.58 (60.68) | 0.197 | NA | NA | NA |
| ...Median (IQR) | 88.00 (28.00–  180.00) | 105.00 (34.00–  180.00) |  | 70.00 (26.00–  180.00) | 76.00 (28.00–  180.00) |  | 83 (28.00–  148.00) | 108.00 (41.00–  157.00) |  | NA | NA |  |
| ...Missing; n (%) | 4,310 (46.6%) | 6,324 (51.1%) |  | 6,753 (52.2%) | 7,656 (56.1%) |  | 1,452 (46.7%) | 4,012 (49.0%) |  | NA | NA |  |
| **Direct-acting oral**  **anticoagulant during baseline; n (%)** | 3,989 (43.1%) | 4,598 (37.2%) | 0.121 | 4,854 (37.5%) | 4,406 (32.3%) | 0.11 | 1,265 (40.7%) | 2,695 (32.9%) | 0.163 | 543 (20.4%) | 276 (19.0%) | 0.034 |
| **Apixaban during baseline;  n (%)** | 2,286 (24.7%) | 2,647 (21.4%) | 0.078 | 1,953 (15.1%) | 1,812 (13.3%) | 0.052 | 742 (23.9%) | 1,315 (16.1%) | 0.197 | 256 (9.6%) | 59 (4.1%) | 0.221 |
| **Rivaroxaban during baseline;**  **n (%)** | 1,370 (14.8%) | 1,623 (13.1%) | 0.048 | 2,039 (15.8%) | 1,811 (13.3%) | 0.071 | 342 (11.0%) | 723 (8.8%) | 0.073 | 97 (3.6%) | 47 (3.2%) | 0.022 |
| **Dabigatran etexilate mesylate**  **during baseline; n (%)** | 396 (4.3%) | 390 (3.2%) | 0.059 | 952 (7.4%) | 853 (6.3%) | 0.044 | 227 (7.3%) | 717 (8.8%) | 0.053 | 221 (8.3%) | 178 (12.3%) | 0.131 |
| **Edoxaban tosylate during**  **baseline; n (%)** | 13 (0.1%) | 11 (0.1%) | 0.015 | 19 (0.1%) | 13 (0.1%) | 0.015 | 6 (0.19%) | 17 (0.21%) | 0.003 | NA | NA | NA |
| **Warfarin sodium during**  **baseline; n (%)** | 1,066 (11.5%) | 1,569 (12.7%) | 0.036 | 1,500 (11.6%) | 1,763 (12.9%) | 0.04 | 421 (13.6%) | 1,611 (19.7%) | 0.165 | 1,535 (57.6%) | 622 (42.8%) | 0.298 |
| **P2Y12 agents; n (%)** | 838 (9.1%) | 1,283 (10.4%) | 0.045 | 1,056 (8.2%) | 1,215 (8.9%) | 0.026 | 266 (8.6%) | 760 (9.3%) | 0.025 | 52 (2.0%) | 76 (5.2%) | 0.178 |
| **Any rate control medications;**  **n (%)** | 7,233 (78.2%) | 9,396 (76.0%) | 0.051 | 9,808 (75.9%) | 10,063 (73.8%) | 0.048 | 1,921 (61.9%) | 4,964 (60.6%) | 0.025 | 2,435 (91.3%) | 1,199 (82.6%) | 0.262 |
| **Digoxin total daily dose, mg** |  |  |  |  |  |  |  |  |  |  |  |  |
| ...Mean (SD) | 177.15 (70.23) | 178.65 (78.35) | 0.02 | 211.29 (204.65) | 281.81 (936.67) | 0.104 | NA | NA | NA | NA | NA | NA |
| ...Median (IQR) | 125.00  (125.00–250.00) | 125.00  (125.00–250.00) |  | 250.00  (125.00–250.00) | 250.00  (125.00–250.00) |  | NA | NA |  | NA | NA |  |
| ...Missing; n (%) | 8,710 (94.1%) | 11,593 (93.8%) |  | 12,046 (93.2%) | 12,715 (93.2%) |  | NA | NA |  | NA | NA |  |
| **Digoxin strength, n (%)** |  |  |  |  |  |  |  |  |  |  |  |  |
| ...0.13 mg | NA | NA | NA | NA | NA | NA | NA | NA | NA | 159 (61.2%) | 61 (47.3%) | 0.280 |

| ...0.25 mg | NA | NA |  | NA | NA |  | NA | NA |  | 101 (38.8%) | 68 (52.7%) |  |
| --- | --- | --- | --- | --- | --- | --- | --- | --- | --- | --- | --- | --- |
| **Calcium channel blockers,**  **non-dihydropyridine; n (%)** | 1,826 (19.7%) | 2,289 (18.5%) | 0.031 | 2,617 (20.2%) | 2,565 (18.8%) | 0.036 | 452 (14.6%) | 1,136 (13.9%) | 0.02 | 84 (3.2%) | 32 (2.2%) | 0.059 |
| **Calcium channel blockers,**  **dihydropyridine; n (%)** | 1,751 (18.9%) | 2,483 (20.1%) | 0.029 | 2,006 (15.5%) | 2,181 (16.0%) | 0.013 | 454 (14.6%) | 1,338 (16.3%) | 0.048 | 555 (20.8%) | 347 (23.9%) | 0.074 |
| **Angiotensin-converting- enzyme (inhibitors;  n (%)** | 2,629 (28.4%) | 3,782 (30.6%) | 0.048 | 3,438 (26.6%) | 4,120 (30.2%) | 0.08 | 867 (27.9%) | 2,951 (36.0%) | 0.175 | 611 (22.9%) | 393 (27.1%) | 0.096 |
| **Angiotensin II receptor**  **blockers (ARBs); n (%)** | 2,121 (22.9%) | 2,812 (22.7%) | 0.004 | 2,775 (21.5%) | 3,015 (22.1%) | 0.015 | 376 (12.1%) | 940 (11.5%) | 0.02 | 654 (24.5%) | 356 (24.5%) | 0 |
| **Aldosterone antagonists;  n (%)** | 266 (2.9%) | 433 (3.5%) | 0.036 | 321 (2.5%) | 418 (3.1%) | 0.035 | 99 (3.2%) | 326 (4.0%) | 0.043 | 104 (3.9%) | 59 (4.1%) | 0.008 |
| **Diuretics; n (%)** | 3,440 (37.2%) | 4,971 (40.2%) | 0.062 | 4,353 (33.7%) | 5,009 (36.7%) | 0.064 | 911 (29.3%) | 2,798 (34.2%) | 0.104 | 578 (21.7%) | 347 (23.9%) | 0.053 |
| **Proarrhythmic medications;  n (%)** | 527 (5.7%) | 827 (6.7%) | 0.041 | 703 (5.4%) | 867 (6.4%) | 0.039 | 131 (4.2%) | 453 (5.5%) | 0.061 | 56 (2.1%) | 21 (1.4%) | 0.5 |
| **Proarrhythmic medications,**  **time since last, days** |  |  |  |  |  |  |  |  |  |  |  |  |
| ...Mean (SD) | 44.42 (53.75) | 40.96 (53.25) | 0.065 | 44.69 (54.61) | 44.62 (54.30) | 0.001 | 50.87 (39.73) | 50.22 (41.80) | 0.016 | 60 (45) | 23 (31) | 0.957 |
| ...Median (IQR) | 16 (1–79) | 8 (1–73) |  | 17 (1–74) | 15 (1–79) |  | 43.00 (13.00–  81.00) | 35.50 (17.00–  74.50) |  | 58 (18–90) | 5 (0–41) |  |
| ...Missing; n (%) | 8,728 (94.3%) | 11,537 (93.3%) |  | 12,225 (94.6%) | 12,774 (93.6%) |  | 3,060 (98.5%) | 8,046 (98.2%) |  | NA | NA |  |
| **SGLT2 inhibitors; n (%)** | 98 (1.1%) | 172 (1.4%) | 0.03 | 124 (1.0%) | 167 (1.2%) | 0.026 | 18 (0.58%) | 73 (0.89%) | 0.037 | 2 (0.1%) | 1 (0.1%) | 0.002 |
| **Eplerenone; n (%)** | 13 (0.1%) | 20 (0.2%) | 0.005 | 30 (0.2%) | 22 (0.2%) | 0.016 | 3 (0.10%) | 12 (0.15%) | 0.014 | 6 (0.2%) | 3 (0.2%) | 0.004 |
| **Spironolactone; n (%)** | 268 (2.9%) | 437 (3.5%) | 0.036 | 319 (2.5%) | 423 (3.1%) | 0.039 | 98 (3.2%) | 331 (4.0%) | 0.048 | 98 (3.7%) | 56 (3.9%) | 0.009 |
| **Angiotensin receptor- neprilysin inhibitors (ARNis);  n (%)** | 10 (0.1%) | 56 (0.5%) | 0.065 | 7 (0.1%) | 14 (0.1%) | 0.017 | 8 (0.26%) | 26 (0.32%) | 0.011 | NA | NA | NA |
| **Body mass index, n (%)** |  |  |  |  |  |  |  |  |  |  |  |  |
| ...<18.5 kg/m2 | NA | NA | NA | NA | NA | NA | 16 (0.52%) | 46 (0.56%) | 0.131 | NA | NA | NA |
| ...18.5 to <25 kg/m2 | NA | NA |  | NA | NA |  | 431 (13.9%) | 890 (10.9%) |  | NA | NA |  |

| ...25 to <30 kg/m2 | NA | NA |  | NA | NA |  | 1,019 (32.8%) | 2,430 (30.3%) |  | NA | NA |  |
| --- | --- | --- | --- | --- | --- | --- | --- | --- | --- | --- | --- | --- |
| ...30+ kg/m2 | NA | NA |  | NA | NA |  | 1,482 (47.7%) | 4,422 (54.0%) |  | NA | NA |  |
| ...Unknown | NA | NA |  | NA | NA |  | 158 (5.1%) | 402 (4.9%) |  | NA | NA |  |
| **Alcohol-related diagnoses, n (%)** | NA | NA | NA | NA | NA | NA | NA | NA | NA | 32 (1.2%) | 33 (2.3%) | 0.082 |
| **Left ventricular ejection**  **fraction %, n (%)** |  |  |  |  |  |  |  |  |  |  |  |  |
| ...Mean (SD) | NA | NA | NA | NA | NA | NA | 57.65 (9.73) | 54.50 (11.66) | 0.29 | NA | NA | NA |
| ...Median (IQR) | NA | NA |  | NA | NA |  | 60.00 (55.00–  65.00) | 55.00 (50.00–  62.00) |  | NA | NA |  |
| ...Missing; n (%) | NA | NA |  | NA | NA |  | 1,401 (45.1%) | 4,138 (50.5%) |  | NA | NA |  |

AF=atrial fibrillation; ASD=absolute standardized difference; CHA2DS2-VASc=congestive heart failure, hypertension, age ≥75 years, diabetes mellitus, stroke or transient ischemic attack, vascular disease, age 65 to 74 years, sex category; ECG=electrocardiogram; IQR=interquartile range; MarketScan=Merative MarketScan database; NA= not assessed; NPR=National Patient Register; Optum=Optum CDM DOD database; SD=standard deviation; SGLT2=sodium-glucose cotransporter-2; VHA EHR=Veterans Health Administration Electronic Health Record.

# Supplemental Table 3. Post-matched Baseline Demographic and Clinical Characteristics Included in the Propensity Score Model

| **Variable** | **Optum** | | | **MarketScan** | | | **VHA EHR** | | | **Swedish NPR** | | |
| --- | --- | --- | --- | --- | --- | --- | --- | --- | --- | --- | --- | --- |
| **Dronedarone** | **Sotalol** | **ASD** | **Dronedarone** | **Sotalol** | **ASD** | **Dronedarone** | **Sotalol** | **ASD** | **Dronedarone** | **Sotalol** | **ASD** |
| **Number of patients** | 8,373 | 8,373 | NA | 10,754 | 10,754 | NA | 3,106 | 3,106 | NA | 1,042 | 1,042 | NA |
| **Year of index** |  |  |  |  |  |  |  |  |  |  |  |  |
| ...2012; n (%) | 883 (10.5%) | 859 (10.3%) | 0.021 | 2,226 (20.7%) | 2,213 (20.6%) | 0.016 | 229 (7.4%) | 259 (8.3%) | 0.075 | NA | NA | 0.069 |
| …2013; n (%) | 835 (10.0%) | 855 (10.2%) |  | 1,817 (16.9%) | 1,856 (17.3%) |  | 241 (7.8%) | 240 (7.7%) |  | 386 (37.0%) | 442 (44.4%) |  |
| ...2014; n (%) | 734 (8.8%) | 738 (8.8%) |  | 1,558 (14.5%) | 1,586 (14.7%) |  | 273 (8.8%) | 288 (9.3%) |  | 503 (48.3%) | 441 (42.3%) |  |
| ...2015; n (%) | 748 (8.9%) | 737 (8.8%) |  | 1,254 (11.7%) | 1,244 (11.6%) |  | 347 (11.2%) | 343 (11.0%) |  | 153 (14.7%) | 159 (15.3%) |  |
| ...2016; n (%) | 742 (8.9%) | 755 (9.0%) |  | 1,146 (10.7%) | 1,127 (10.5%) |  | 425 (13.7%) | 413 (13.3%) |  | NA | NA |  |
| ...2017; n (%) | 905 (10.8%) | 922 (11.0%) |  | 879 (8.2%) | 884 (8.2%) |  | 379 (12.2%) | 365 (11.8%) |  | NA | NA |  |
| ...2018; n (%) | 891 (10.6%) | 897 (10.7%) |  | 716 (6.7%) | 714 (6.6%) |  | 415 (13.4%) | 410 (13.2%) |  | NA | NA |  |
| ...2019; n (%) | 902 (10.8%) | 903 (10.8%) |  | 675 (6.3%) | 653 (6.1%) |  | 448 (14.4%) | 434 (14.0%) |  | NA | NA |  |
| ...2020; n (%) | 850 (10.2%) | 814 (9.7%) |  | 483 (4.5%) | 477 (4.4%) |  | 349 (11.2%) | 354 (11.4%) |  | NA | NA |  |
| ...2021; n (%) | 883 (10.5%) | 893 (10.7%) |  | NA | NA |  | NA | NA |  | NA | NA |  |

| **Age, categorical, years** |  |  |  |  |  |  |  |  |  |  |  |  |
| --- | --- | --- | --- | --- | --- | --- | --- | --- | --- | --- | --- | --- |
| ...18–34;  n (%) | 51 (0.6%) | 50 (0.6%) | 0.016 | 118 (1.1%) | 118 (1.1%) | 0.014 | 12 (0.39%) | 10 (0.32%) | 0.037 | 5 (0.5%) | 5 (0.5%) | 0.069 |
| ...35–44;  n (%) | 162 (1.9%) | 156 (1.9%) |  | 435 (4.0%) | 425 (4.0%) |  | 33 (1.1%) | 35 (1.1%) |  | 33 (3.2%) | 29 (2.8%) |  |
| ...45–54;  n (%) | 662 (7.9%) | 680 (8.1%) |  | 1,696 (15.8%) | 1,703 (15.8%) |  | 148 (4.8%) | 141 (4.5%) |  | 114 (10.9%) | 102 (9.8%) |  |
| ...55–64;  n (%) | 1,698 (20.3%) | 1,689 (20.2%) |  | 4,658 (43.3%) | 4,712 (43.8%) |  | 479 (15.4%) | 481 (15.5%) |  | 290 (27.8%) | 296 (28.4%) |  |
| ...65–74;  n (%) | 3,295 (39.4%) | 3,259 (38.9%) |  | 2,116 (19.7%) | 2,075 (19.3%) |  | 1,380 (44.4%) | 1,374 (44.2%) |  | 423 (40.6%) | 411 (39.4%) |  |
| ...75–84;  n (%) | 2,122 (25.3%) | 2,139 (25.5%) |  | 1,383 (12.9%) | 1,383 (12.9%) |  | 760 (24.5%) | 761 (24.5%) |  | 164 (15.7%) | 183 (17.6%) |  |
| ...≥85; n (%) | 383 (4.6%) | 400 (4.8%) |  | 348 (3.2%) | 338 (3.1%) |  | 294 (9.5%) | 304 (9.8%) |  | 13 (1.2%) | 16 (1.5%) |  |
| **Sex** |  |  |  |  |  |  |  |  |  |  |  |  |
| ...Male; n (%) | 4,558 (54.4%) | 4,526 (54.1%) | 0.008 | 6,705 (62.3%) | 6,772 (63.0%) | 0.013 | 3,030 (97.6%) | 3,031 (97.6%) | 0.002 | 602 (57.8%) | 625 (60.0%) | 0.045 |
| ...Female;  n (%) | 3,815 (45.6%) | 3,847 (45.9%) |  | 4,049 (37.7%) | 3,982 (37.0%) |  | 76 (2.5%) | 75 (2.4%) |  | 440 (42.2%) | 417 (40.0%) |  |
| **Race/ethnicity** |  |  |  |  |  |  |  |  |  |  |  |  |
| ...White; n (%) | 6,486 (77.5%) | 6,518 (77.8%) | 0.011 | NA | NA | NA | 2,857 (92.0%) | 2,852 (91.8%) | 0.076 | NA | NA | NA |
| ...African  American;  n (%) | 632 (7.5%) | 612 (7.3%) |  | NA | NA |  | 176 (5.7%) | 166 (5.3%) |  | NA | NA |  |
| ...Hispanic;  n (%) | 661 (7.9%) | 649 (7.8%) |  | NA | NA |  | 3 (0.10%) | 6 (0.19%) |  | NA | NA |  |
| ...Other/ Unknown/  Missing; n (%) | 594 (7.1%) | 594 (7.1%) |  | NA | NA |  | 70 (2.3%) | 82 (2.6%) |  | NA | NA |  |

| **Region – US** |  |  |  |  |  |  |  |  |  |  |  |  |
| --- | --- | --- | --- | --- | --- | --- | --- | --- | --- | --- | --- | --- |
| ...Northeast;  n (%) | 848 (10.1%) | 826 (9.9%) | 0.009 | 1,999 (18.6%) | 1,995 (18.6%) | 0.014 | 447 (14.4%) | 431 (13.9%) | 0.032 | NA | NA | NA |
| ...Midwest;  n (%) | 1,666 (19.9%) | 1,683 (20.1%) |  | 2,430 (22.6%) | 2,439 (22.7%) |  | 1,001 (32.2%) | 1,010 (32.5%) |  | NA | NA |  |
| ...Southeast;  n (%) | 4,275 (51.1%) | 4,278 (51.1%) |  | 4,952 (46.0%) | 4,993 (46.4%) |  | 1,246 (40.1%) | 1,249 (40.2%) |  | NA | NA |  |
| ...West; n (%) | 1,579 (18.9%) | 1,581 (18.9%) |  | 1,245 (11.6%) | 1,200 (11.2%) |  | 408 (13.1%) | 413 (13.3%) |  | NA | NA |  |
| ...Other/ Unknown;  n (%) | 5 (0.1%) | 5 (0.1%) |  | 128 (1.2%) | 127 (1.2%) |  | 4 (0.13%) | 3 (0.10%) |  | NA | NA |  |
| **Region –**  **Sweden** |  |  |  |  |  |  |  |  |  |  |  |  |
| ...Stockholm, n (%) | NA | NA | NA | NA | NA | NA | NA | NA | NA | 178 (17.1%) | 209 (20.1%) | 0.049 |
| ...West, n (%) | NA | NA |  | NA | NA |  | NA | NA |  | 251 (24.1%) | 249 (23.9%) |  |
| ...South, n (%) | NA | NA |  | NA | NA |  | NA | NA |  | 132 (12.7%) | 104 (10.0%) |  |
| ...Other, n (%) | NA | NA |  | NA | NA |  | NA | NA |  | 481 (46.2%) | 480 (46.1%) |  |
| **Insurance**  **status** |  |  |  |  |  |  |  |  |  |  |  |  |
| ...Commercial;  n (%) | 2,730 (32.6%) | 2,739 (32.7%) | 0.002 | 6,889 (64.1%) | 6,935 (64.5%) | 0.009 | NA | NA | NA | NA | NA | NA |
| ...Medicare;  n (%) | 5,643 (67.4%) | 5,634 (67.3%) |  | 3,865 (35.9%) | 3,819 (35.5%) |  | NA | NA |  | NA | NA |  |
| **Type of AF** |  |  |  |  |  |  |  |  |  |  |  |  |
| ...Unknown AF  (*ICD-9* only); n (%) | 3,006 (35.9%) | 2,995 (35.8%) | 0.009 | 6,577 (61.2%) | 6,624 (61.6%) | 0.013 | 1,017 (32.7%) | 1,065 (34.3%) | 0.035 | NA | NA |  |
| ...Unspecified  AF; n (%) | 735 (8.8%) | 756 (9.0%) |  | 648 (6.0%) | 657 (6.1%) |  | 605 (19.5%) | 567 (18.3%) |  | NA | NA |  |
| ...Paroxysmal  AF; n (%) | 2,938 (35.1%) | 2,925 (34.9%) |  | 2,197 (20.4%) | 2,172 (20.2%) |  | 947 (30.5%) | 942 (30.3%) |  | NA | NA | NA |
| ...Persistent  AF; n (%) | 1,024 (12.2%) | 1,023 (12.2%) |  | 882 (8.2%) | 852 (7.9%) |  | 204 (6.6%) | 209 (6.7%) |  | NA | NA |  |
| ...Permanent  AF; n (%) | 670 (8.0%) | 674 (8.0%) |  | 450 (4.2%) | 449 (4.2%) |  | 333 (10.7%) | 323 (10.4%) |  | NA | NA |  |

| **Setting of first AF diagnosis during**  **baseline** |  |  |  |  |  |  |  |  |  |  |  |  |
| --- | --- | --- | --- | --- | --- | --- | --- | --- | --- | --- | --- | --- |
| ...Inpatient;  n (%) | 1,623 (19.4%) | 1,630 (19.5%) | 0.011 | 2,426 (22.6%) | 2,436 (22.7%) | 0.008 | 268 (8.6%) | 255 (8.2%) | 0.055 | NA | NA | NA |
| ...ED; n (%) | 1,073 (12.8%) | 1,096 (13.1%) |  | 1,286 (12.0%) | 1,293 (12.0%) |  | 166 (5.3%) | 174 (5.6%) |  | NA | NA |  |
| ...Outpatient;  n (%) | 5,395 (64.4%) | 5,356 (64.0%) |  | 6,625 (61.6%) | 6,596 (61.3%) |  | 2,672 (86.0%) | 2,677 (86.2%) |  | NA | NA |  |
| ...Other; n (%) | 268 (3.2%) | 277 (3.3%) |  | 404 (3.8%) | 419 (3.9%) |  | NA | NA |  | NA | NA |  |
| ...Missing;  n (%) | 14 (0.2%) | 14 (0.2%) |  | 13 (0.1%) | 10 (0.1%) |  | NA | NA |  | NA | NA |  |
| **Months**  **between the** |  |  |  |  |  |  |  |  |  |  |  |  |
| **first diagnosis**  **of AF and the index date** |  |  |  |  |  |  |  |  |  |  |  |  |
| ...Mean (SD) | 2.17 (2.02) | 2.17 (2.06) | 0.002 | 1.90 (1.94) | 1.88 (1.97) | 0.012 | 2.24 (1.97) | 2.28 (2.09) | 0.02 | NA | NA | NA |
| ...Median  (IQR) | 1.48 (0.23–  4.01) | 1.45 (0.20–  4.08) |  | 1.18 (0.13–  3.42) | 1.08 (0.13–  3.42) |  | 2 (1–4) | 2 (0–4) |  | NA | NA |  |
| **Atrial flutter or fibrillation/ flutter; n (%)** | NA | NA | NA | NA | NA | NA | NA | NA | NA | 92 (8.8%) | 99 (9.5%) | 0.023 |
| **Cardiomyopat hy or congenital anomalies of the heart; n**  **(%)** | 1,235 (14.7%) | 1,227 (14.7%) | 0.003 | 1,279 (11.9%) | 1,263 (11.7%) | 0.005 | 192 (6.2%) | 184 (5.9%) | 0.011 | 36 (3.5%) | 28 (2.7%) | 0.044 |
| **Chronic renal**  **disease; n (%)** | 1,240 (14.8%) | 1,248 (14.9%) | 0.003 | 649 (6.0%) | 660 (6.1%) | 0.004 | 274 (8.8%) | 260 (8.4%) | 0.016 | 14 (1.3%) | 14 (1.3%) | 0.000 |
| **Congestive heart failure;**  **n (%)** | 1,526 (18.2%) | 1,517 (18.1%) | 0.003 | 1,297 (12.1%) | 1,289 (12.0%) | 0.002 | 311 (10.0%) | 297 (9.6%) | 0.015 | 113 (10.8%) | 88 (8.4%) | 0.081 |
| **Diabetes mellitus;  n (%)** | 2,227 (26.6%) | 2,238 (26.7%) | 0.003 | 2,364 (22.0%) | 2,358 (21.9%) | 0.001 | 881 (28.4%) | 889 (28.6%) | 0.006 | 120 (11.5%) | 108 (10.4%) | 0.037 |
| **Hypertension;**  **n (%)** | 6,470 (77.3%) | 6,464 (77.2%) | 0.002 | 7,036 (65.4%) | 7,041 (65.5%) | 0.001 | 1,997 (64.3%) | 2,026 (65.2%) | 0.011 | 597 (57.4%) | 578 (55.5%) | 0.037 |
| **Ischemic heart disease (subsequent MI, other acute ischemic**  **heart disease,** | 3,263 (39.0%) | 3,235 (38.6%) | 0.007 | 3,282 (30.5%) | 3,286 (30.6%) | 0.001 | 1,270 (40.9%) | 1,277 (41.1%) | 0.005 | 96 (9.2%) | 98 (9.4%) | 0.007 |

| **or chronic ischemic heart disease); n**  **(%)** |  |  |  |  |  |  |  |  |  |  |  |  |
| --- | --- | --- | --- | --- | --- | --- | --- | --- | --- | --- | --- | --- |
| **Myocardial**  **infarction; n (%)** | 401 (4.8%) | 412 (4.9%) | 0.006 | 389 (3.6%) | 389 (3.6%) | 0.000 | 41 (1.3%) | 35 (1.1%) | 0.018 | 89 (8.5%) | 89 (8.5%) | 0.000 |
| **Number of non–AF- related inpatient hospitalizations** |  |  |  |  |  |  |  |  |  |  |  |  |
| ...Mean (SD) | 0.25 (0.55) | 0.25 (0.54) | 0.003 | 0.21 (0.49) | 0.21 (0.49) | 0.009 | 0.28 (0.69) | 0.28 (0.69) | 0.001 | 0.27 (0.71) | 0.23 (0.57) | 0.069 |
| ...Median  (IQR) | 0 (0–0) | 0 (0–0) |  | 0 (0–0) | 0 (0–0) |  | 0 (0–0) | 0 (0–0) |  | 0 (0–0) | 0 (0–0) |  |
| **Peripheral artery disease;**  **n (%)** | 565 (6.7%) | 562 (6.7%) | 0.001 | 328 (3.1%) | 341 (3.2%) | 0.007 | 143 (4.6%) | 140 (4.5%) | 0.005 | 37 (3.6%) | 35 (3.4%) | 0.011 |
| **Stroke or**  **TIA; n (%)** | 696 (8.3%) | 697 (8.3%) | 0.000 | 608 (5.7%) | 617 (5.7%) | 0.004 | 89 (2.9%) | 99 (3.2%) | 0.019 | NA | NA | NA |
| **Stroke; n (%)** | NA | NA | NA | NA | NA | NA | NA | NA | NA | 70 (6.7%) | 58 (5.6%) | 0.048 |
| **TIA; n (%)** | NA | NA | NA | NA | NA | NA | NA | NA | NA | 49 (4.7%) | 45 (4.3%) | 0.018 |
| **Ablation**  **procedure;  n (%)** | 29 (0.3%) | 30 (0.4%) | 0.002 | 31 (0.3%) | 32 (0.3%) | 0.002 | 15 (0.48%) | 15 (0.48%) | 0.000 | 28 (2.7%) | 29 (2.8%) | 0.006 |
| **Time since last**  **cardioversion** |  |  |  |  |  |  |  |  |  |  |  |  |
| ...No previous  cardioversion; n (%) | 6,653 (79.5%) | 6,668 (79.6%) | 0.007 | 8,294 (77.1%) | 8,279 (77.0%) | 0.014 | 2,943 (94.8%) | 2,962 (95.4%) | 0.028 | 721 (69.2%) | 681 (65.4%) | 0.138 |
| ...Cardioversio n within previous 2  days; n (%) | 409 (4.9%) | 415 (5.0%) |  | 702 (6.5%) | 739 (6.9%) |  | 32 (1.0%) | 35 (1.0%) |  | 92 (8.8%) | 47 (4.5%) |  |

| ...Cardioversio n more than 2 days before; n  (%) | 1,311 (15.7%) | 1,290 (15.4%) |  | 1,758 (16.3%) | 1,736 (16.1%) |  | 138 (4.4%) | 116 (3.7%) |  | 229 (22.0%) | 314 (30.1%) |  |
| --- | --- | --- | --- | --- | --- | --- | --- | --- | --- | --- | --- | --- |
| **Apixaban on**  **index; n (%)** | 2,242 (26.8%) | 2,290 (27.3%) | 0.013 | 1,914 (17.8%) | 1,951 (18.1%) | 0.009 | 153 (4.9%) | 136 (4.4%) | 0.026 | 61 (5.9%) | 33(3.2%) | 0.130 |
| **Rivaroxaban**  **on index;  n (%)** | 1,296 (15.5%) | 1,265 (15.1%) | 0.010 | 2,059 (19.1%) | 2,065 (19.2%) | 0.001 | 81 (2.6%) | 66 (2.1%) | 0.032 | 23 (2.2%) | 16 (1.5%) | 0.050 |
| **Dabigatran etexilate mesylate on**  **index; n (%)** | 302 (3.6%) | 309 (3.7%) | 0.004 | 875 (8.1%) | 885 (8.2%) | 0.003 | 41 (1.3%) | 33 (1.1%) | 0.024 | 22 (2.1%) | 28 (2.7%) | 0.038 |
| **Edoxaban tosylate on**  **index; n (%)** | 8 (0.1%) | 7 (0.1%) | 0.004 | 12 (0.1%) | 11 (0.1%) | 0.003 | 3 (0.10%) | 1 (0.03%) | 0.025 | NA | NA | NA |
| **Warfarin sodium on**  **index; n (%)** | 951 (11.4%) | 952 (11.4%) | 0.000 | 1,291 (12.0%) | 1,310 (12.2%) | 0.005 | 62 (2.0%) | 66 (2.1%) | 0.009 | 100 (9.6%) | 139 (13.3%) | 0.118 |
| **Anticoagulant s during baseline;  n (%)** | 4,324 (51.6%) | 4,344 (51.9%) | 0.005 | 4,886 (45.4%) | 4,892 (45.5%) | 0.001 | 1,654 (53.3%) | 1,673 (53.9%) | 0.012 | 779 (74.8%) | 809 (77.6%) | 0.068 |
| **Digoxin;  n (%)** | 494 (5.9%) | 489 (5.8%) | 0.003 | 739 (6.9%) | 713 (6.6%) | 0.010 | 132 (4.3%) | 148 (4.8%) | 0.025 | 111 (10.7%) | 106 (10.2%) | 0.016 |
| **Beta-blocking**  **agents; n (%)** | 5,321 (63.5%) | 5,312 (63.4%) | 0.002 | 6,552 (60.9%) | 6,510 (60.5%) | 0.008 | 1,531 (49.3%) | 1,506 (48.5%) | 0.016 | 888 (85.3%) | 893 (85.7%) | 0·014 |
| **Calcium channel blockers; n**  **(%)** | 3,045 (36.4%) | 3,083 (36.8%) | 0.009 | 3,730 (34.7%) | 3,685 (34.3%) | 0.009 | 862 (27.8%) | 875 (28.2%) | 0.009 | 245 (23.5%) | 238 (22.8%) | 0.016 |
| **Ezetimibe;  n (%)** | 248 (3.0%) | 235 (2.8%) | 0.009 | 367 (3.4%) | 372 (3.5%) | 0.003 | 21 (0.7%) | 25 (0.8%) | 0.015 | 15 (1.4%) | 9 (0.9%) | 0.054 |
| **Ezetimibe – number of**  **prescriptions** |  |  |  |  |  |  |  |  |  |  |  |  |
| ...Mean (SD) | 0.08 (0.58) | 0.08 (0.55) | 0.010 | 0.08 (0.51) | 0.09 (0.54) | 0.009 | 0.02 (0.25) | 0.02 (0.24) | 0.003 | 2.07 (0.6) | 1.88 (1.3) | 0.179 |

| ...Median  (IQR) | 0 (0–0) | 0 (0–0) |  | 0 (0–0) | 0 (0–0) |  | 0 (0–0) | 0 (0–0) |  | 2 (2–2) | 2 (1–2) |  |
| --- | --- | --- | --- | --- | --- | --- | --- | --- | --- | --- | --- | --- |
| **Statins; n (%)** | 4,371 (52.2%) | 4,374 (52.2%) | 0.001 | 4,949 (46.0%) | 4,946 (46.0%) | 0.001 | 1,711 (55.1%) | 1,721 (55.4%) | 0.006 | 350 (33.6%) | 314 (30.1%) | 0.074 |
| **PCSK9**  **inhibitor;  n (%)** | 20 (0.2%) | 19 (0.2%) | 0.002 | 4 (0.0%) | 4 (0.0%) | 0.000 | 1 (0.03%) | 1 (0.03%) | 0.000 | NA | NA | NA |
| **PCSK9**  **inhibitor – number of**  **prescriptions** |  |  |  |  |  |  |  |  |  |  |  |  |
| ...Mean (SD) | 0.01 (0.17) | 0.01 (0·17) | 0.001 | 0.00 (0.10) | 0.00 (0.10) | 0.002 | 0.001 (0.07) | 0.00 (0.04) | 0.011 | NA | NA | NA |
| …Median  (IQR) | 0 (0–0) | 0 (0–0) |  | 0 (0–0) | 0 (0–0) |  | 0 (0–0) | 0 (0–0) |  | NA | NA | NA |
| **Pulmonary medications;  n (%)** | 1,475 (17.6%) | 1,502 (17.9%) | 0.008 | 1,585 (14.7%) | 1,592 (14.8%) | 0.002 | 686 (22.1%) | 703 (22.6%) | 0.013 | NA | NA | NA |

AF=atrial fibrillation; ASD=absolute standardized difference; CHA2DS2-VASc=congestive heart failure, hypertension, age ≥75 years, diabetes mellitus, stroke or transient ischemic attack, vascular disease, age 65 to 74 years, sex category; ED=emergency department; IQR=interquartile range; Optum=Optum CDM DOD database; *ICD-9*=*International Classification of Diseases, Ninth Revision*; MarketScan=Merative MarketScan database; MI=myocardial infarction; NA=not assessed; NPR=National Patient Register; PCSK9=proprotein convertase subtilisin/kexin type 9; SD=standard deviation; TIA=transient ischemic attack; VHA EHR=Veterans Health Administration Electronic Health Record.

# Supplemental Table 4. Post-matched Baseline Demographic and Clinical Characteristics Not Included in the Propensity Score Model

| **Variable** | **Optum** | | | **MarketScan** | | | **VHA EHR** | | | **Swedish NPR** | | |
| --- | --- | --- | --- | --- | --- | --- | --- | --- | --- | --- | --- | --- |
| **Dronedarone** | **Sotalol** | **ASD** | **Dronedarone** | **Sotalol** | **ASD** | **Dronedarone** | **Sotalol** | **ASD** | **Dronedarone** | **Sotalol** | **ASD** |
| **Number of patients** | 8,373 | 8,373 | - | 10,754 | 10,754 | - | 3,106 | 3,106 |  | 1,042 | 1,042 |  |
| **Age, continuous, years** |  |  |  |  |  |  |  |  |  |  |  |  |
| ...Mean (SD) | 68.40 (10.74) | 68.44 (10.71) | 0.004 | 62.56 (11.43) | 62.51 (11.27) | 0.004 | 70.9 (10.2) | 70.9 (10.2) | 0.003 | 65.1 (10.2) | 65.8 (10.2) | 0.069 |
| ...Median (IQR) | 69.00 (62.00–  76.00) | 69.00 (62.00–  76.00) |  | 62.00 (56.00–  70.00) | 62.00 (56.00–  70.00) |  | 71.0 (65.0–78.0) | 71.0 (65.0–77.0) |  | 67 (59–72) | 67 (60–73) |  |
| **Time from AF diagnosis to initiation of thromboprophylaxis during**  **baseline period, days** |  |  |  |  |  |  |  |  |  |  |  |  |
| ...Mean (SD) | -2.80 (61.28) | -4.87 (63.62) | 0.033 | -9.63 (62.20) | -11.46 (65.40) | 0.029 | 0.66 (52.59) | -2.78 (54.64) | 0.064 | NA | NA | NA |
| ...Median (IQR) | 1.00 (-13.00–  15.00) | 1.00 (-15.00–  13.00) |  | 0.00 (-19.00–  10.00) | 0.00 (-25.75–  11.00) |  | 3.00 (0.00–  15.00) | 3.00 (-6.00–  17.00) |  | NA | NA |  |
| ...Missing; n (%) | 3,033 (36.2%) | 2,952 (35.3%) |  | 5,868 (54.6%) | 5,862 (54.5%) |  | 1,452 (46.7%) | 1,433 (46.1%) |  | NA | NA |  |
| **CHA2DS2-VASc score -  180-day lookback** |  |  |  |  |  |  |  |  |  |  |  |  |
| ...Mean (SD) | 3.14 (1.83) | 3.15 (1.82) | 0.004 | 2.28 (1.79) | 2.26 (1.75) | 0.007 | 2.00 (1.29) | 1.98 (1.28) | 0.024 | 1.84 (1.44) | 1.81 (1.30) | 0.02 |
| ...Median (IQR) | 3 (2–4) | 3 (2–4) |  | 2 (1– 3) | 2 (1– 3) |  | 2 (1– 3) | 2 (1– 3) |  | 2 (1– 3) | 2 (1– 3) |  |
| **Chronic pulmonary disease;  n (%)** | 1,891 (22.6%) | 1,900 (22.7%) | 0.003 | 1,607 (14.9%) | 1,537 (14.3%) | 0.018 | 607 (19.5%) | 632 (20.4%) | 0.02 | 116 (11.1%) | 88 (8.4%) | 0.09 |
| **Hypercholesterolemia; n (%)** | 1,808 (21.6%) | 1,736 (20.7%) | 0.021 | 1,845 (17.2%) | 1,722 (16.0%) | 0.031 | 122 (3.9%) | 140 (4.5%) | 0.029 | 61 (5.9%) | 53 (5.1%) | 0.034 |
| **Mental health disorders;  n (%)** | 2,580 (30.8%) | 2,690 (32.1%) | 0.028 | 2,393 (22.3%) | 2,460 (22.9%) | 0.015 | 929 (29.9%) | 964 (31.0%) | 0.024 | 128 (12.3%) | 121 (11.6%) | 0.021 |

| **Dronedarone co-pay on index**  **date** |  |  |  |  |  |  |  |  |  |  |  |  |
| --- | --- | --- | --- | --- | --- | --- | --- | --- | --- | --- | --- | --- |
| ...Mean (SD) | 68.92 (84.90) | NA | NA | 49.83 (57.06) | NA | NA | NA | NA | NA | NA | NA | NA |
| ...Median (IQR) | 45.00 (29.99–  70.00) | NA |  | 40.00 (15.00–  64.00) | NA |  | NA | NA |  | NA | NA |  |
| …Missing; n (%) | 0 (0.0%) | NA |  | 1,158 (10.8%) | NA |  | NA | NA |  | NA | NA |  |
| **Sotalol co-pay on index date** |  |  |  |  |  |  |  |  |  |  |  |  |
| ...Mean (SD) | NA | 9.86 (9.28) | NA | NA | 6.17 (6.75) | NA | NA | NA | NA | NA | NA | NA |
| ...Median (IQR) | NA | 8.00 (4.00–  12.00) |  | NA | 5.00 (0.00–  10.00) |  | NA | NA |  | NA | NA |  |
| …Missing; n (%) | NA | 0 (0.0%) |  | NA | 1,130 (10.5%) |  | NA | NA |  | NA | NA |  |
| **Dronedarone total daily dose**  **on index date** |  |  |  |  |  |  |  |  |  |  |  |  |
| ...Mean (SD) | 792.49 (73.68) | NA | NA | 1,043.80  (3,134.97) | NA | NA | 800 (0) | NA | NA | NA | NA | NA |
| ...Median (IQR) | 800.00 (800.00–800.00) | NA |  | 800.00  (800.00–800.00) | NA |  | 800.00 (800.00–800.00) | NA |  | NA | NA |  |
| …Missing; n (%) | 0 (0.0%) | NA |  | 0 (0.0%) | NA |  | 0 (0.0%) | NA |  | NA | NA |  |
| **Sotalol total daily dose on**  **index date** |  |  |  |  |  |  |  |  |  |  |  |  |
| ...Mean (SD) | NA | 175.42 (37.48) | NA | NA | 252.97 (678.83) | NA | NA | 168.7 (60.5) | NA | NA | NA | NA |
| ...Median (IQR) | NA | 160.00  (160.00–160.00) |  | NA | 160.00  (160.00–160.00) |  | NA | 160  (160–160) |  | NA | NA |  |
| …Missing; n (%) | NA | 0 (0.0%) |  | NA | 0 (0.0%) |  | NA | 0 (0.0%) |  | NA | NA |  |
| **Prescriber specialty of index**  **prescription** |  |  |  |  |  |  |  |  |  |  |  |  |
| …General practitioner; n (%) | 1,871 (22.3%) | 2,457 (29.3%) | 0.16 | NA | NA | NA | NA | NA | NA | NA | NA | NA |
| …Cardiologist; n (%) | 5,308 (63.4%) | 4,638 (55.4%) | 0.163 | NA | NA | NA | NA | NA | NA | NA | NA | NA |
| …Electrophysiologist; n (%) | 1,374 (16.4%) | 1,261 (15.1%) | 0.037 | NA | NA | NA | NA | NA | NA | NA | NA | NA |

| …Other/Unknown/Missing;  n (%) | 1,196 (14.3%) | 1,281 (15.3%) | 0.029 | NA | NA | NA | NA | NA | NA | NA | NA | NA |
| --- | --- | --- | --- | --- | --- | --- | --- | --- | --- | --- | --- | --- |
| **Number of cardiologist visits**  **during the baseline period** |  |  |  |  |  |  |  |  |  |  |  |  |
| ...Mean (SD) | 3.85 (3.57) | 3.95 (3.64) | 0.028 | 3.25 (3.30) | 3.31 (3.56) | 0.018 | 4.69 (4.05) | 3.96 (4.02) | 0.183 | NA | NA | NA |
| ...Median (IQR) | 3 (1–5) | 3 (1–6) |  | 3 (1–5) | 2 (1–5) |  | 3 (2–6) | 3 (1–5) |  | NA | NA |  |
| **Count of ECG procedures**  **performed in last 180 days** |  |  |  |  |  |  |  |  |  |  |  |  |
| ...Mean (SD) | 2.74 (2.13) | 2.81 (2.33) | 0.032 | 2.72 (2.08) | 2.87 (2.41) | 0.068 | 1.38 (1.73) | 1.20 (1.95) | 0.096 | NA | NA | NA |
| ...Median (IQR) | 2 (1–4) | 2 (1–4) |  | 2 (1–4) | 2 (1–4) |  | 1 (0–2) | 0 (0–2) |  | NA | NA |  |
| **Number of emergency department**  **visits** |  |  |  |  |  |  |  |  |  |  |  |  |
| ...Mean (SD) | 1.00 (1.57) | 1.00 (1.49) | 0.002 | 0.55 (0.99) | 0.52 (0.93) | 0.034 | 0.75 (1.85) | 0.67 (1.68) | 0.046 | NA | NA | NA |
| ...Median (IQR) | 1 (0–1) | 1 (0–1) |  | 0 (0–1) | 0 (0–1) |  | 0 (0–0) | 0 (0–0) |  | NA | NA |  |
| **Number of inpatient**  **hospitalizations** |  |  |  |  |  |  |  |  |  |  |  |  |
| ...Mean (SD) | 0.43 (0.66) | 0.57 (0.71) | 0.202 | 0.44 (0.63) | 0.59 (0.66) | 0.233 | 0.28 (0.70) | 0.29 (0.70) | 0.001 | 0.78 (1.10) | 0.86 (1.00) | 0.070 |
| ...Median (IQR) | 0 (0–1) | 0 (0–1) |  | 0 (0–1) | 1 (0–1) |  | 0 (0–0) | 0 (0–0) |  | 1 (0–1) | 0 (0–1) |  |
| **Number of inpatient**  **hospitalizations - AF-related** |  |  |  |  |  |  |  |  |  |  |  |  |
| ...Mean (SD) | 0.19 (0.42) | 0.32 (0.52) | 0.29 | 0.24 (0.45) | 0.38 (0.54) | 0.292 | 0.15 (0.43) | 0.16 (0.48) | 0.038 | 0.51 (0.79) | 0.63 (0.83) | 0.146 |
| ...Median (IQR) | 0 (0–0) | 0 (0–1) |  | 0 (0–0) | 0 (0–1) |  | 0 (0–0) | 0 (0–0) |  | 0 (0–1) | 0 (0–1) |  |
| **Total days of hospitalization -**  **Any** |  |  |  |  |  |  |  |  |  |  |  |  |
| ...Mean (SD) | 2.09 (5.21) | 2.43 (4.42) | 0.07 | 1.75 (4.26) | 2.32 (4.04) | 0.135 | 1.33 (11.13) | 1.16 (7.6) | 0.017 | 2.23 (5.59) | 2.74 (5.46) | 0.092 |
| ...Median (IQR) | 0 (0–3) | 0 (0–3) |  | 0 (0–2) | 1 (0–3) |  | 0 (0–0) | 0 (0–0) |  | 0 (0–2) | 1 (0–3) |  |
| **Total days of hospitalization -**  **AF-related** |  |  |  |  |  |  |  |  |  |  |  |  |

| ...Mean (SD) | 0.58 (1.60) | 1.01 (1.97) | 0.243 | 0.63 (1.52) | 1.14 (1.96) | 0.287 | 0.37 (1.54) | 0.58 (6.82) | 0.043 | 1.06 (2.19) | 1.55 (2.50) | 0.206 |
| --- | --- | --- | --- | --- | --- | --- | --- | --- | --- | --- | --- | --- |
| ...Median (IQR) | 0 (0–0) | 0 (0–2) |  | 0 (0–0) | 0 (0–2) |  | 0 (0–0) | 0 (0–0) |  | 1 (0–1) | 1 (0–3) |  |
| **Total days of hospitalization -**  **non–AF-related** |  |  |  |  |  |  |  |  |  |  |  |  |
| ...Mean (SD) | 1.51 (5.02) | 1.41 (4.04) | 0.022 | 1.12 (4.05) | 1.18 (3.75) | 0.015 | 1.32 (11.13) | 1.16 (7.6) | 0.017 | 1.17 (5.08) | 1.20 (4.98) | 0.005 |
| ...Median (IQR) | 0 (0–0) | 0 (0–0) |  | 0 (0–0) | 0 (0–0) |  | 0 (0–0) | 0 (0–0) |  | 0 (0–0) | 0 (0–0) |  |
| **Number of outpatient visits** |  |  |  |  |  |  |  |  |  |  |  |  |
| ...Mean (SD) | 12.76 (10.02) | 12.05 (9.95) | 0.072 | 11.73 (9.17) | 11.14 (9.18) | 0.064 | 17.94 (15.18) | 17.3 (14.6) | 0.043 | 2.81 (2.43) | 2.39 (2.41) | 0.172 |
| ...Median (IQR) | 10 (6–16) | 10 (6–16) |  | 9 (5–15) | 9 (5–15) |  | 13 (8–23) | 13 (7–23) |  | 2 (1–4) | 2 (1–3) |  |
| **QT prolongation; n (%)** | 0 (0.0%) | 0 (0.0%) | - | 0 (0.0%) | 0 (0.0%) | - | 0 (0.0%) | 0 (0.0%) | - | NA | NA | NA |
| **Systemic embolism; n (%)** | 21 (0.3%) | 21 (0.3%) | 0 | 28 (0.3%) | 24 (0.2%) | 0.008 | 8 (0.26%) | 5 (0.16%) | 0.021 | 3 (0.3%) | 4 (0.4%) | 0.017 |
| **Valvular disease; n (%)** | 2,875 (34.3%) | 2,782 (33.2%) | 0.023 | 2,941 (27.3%) | 3,069 (28.5%) | 0.027 | 231 (7.4%) | 236 (7.6%) | 0.006 | 18 (1.7%) | 20 (1.9%) | 0.014 |
| **Cardioversion; n (%)** | 1,720 (20.5%) | 1,705 (20.4%) | 0.004 | 2,460 (22.9%) | 2,475 (23.0%) | 0.003 | 163 (5.3%) | 169 (5.4%) | 0.028 | 257 (24.7%) | 295 (28.3%) | 0.083 |
| **Oral anticoagulants for thromboprophylaxis: time since initiation until index,**  **days** |  |  |  |  |  |  |  |  |  |  |  |  |
| ...Mean (SD) | 98.40 (70.32) | 102.08 (69.90) | 0.052 | 90.71 (68.28) | 92.04 (69.32) | 0.019 | 86.6 (61.00) | 96.3 (61.10) | 0.158 | NA | NA | NA |
| ...Median (IQR) | 90.00 (29.00–  180.00) | 98.50 (32.00–  180.00) |  | 71.00 (27.00–  180.00) | 73.00 (27.00–  180.00) |  | 83.00  (28.00–148.00) | 104.50 (37.00–  155.00) |  | NA | NA |  |
| ...Missing; n (%) | 4,049 (48.4%) | 4,029 (48.1%) |  | 5,868 (54.6%) | 5,862 (54.5%) |  | 1,452 (46.7%) | 1,433 (46.1%) |  | NA | NA |  |
| **Direct-acting oral anticoagulant during**  **baseline; n (%)** | 3,442 (41.1%) | 3,419 (40.8%) | 0.006 | 3,730 (34.7%) | 3,722 (34.6%) | 0.002 | 1,265 (40.7%) | 1,156 (37.2%) | 0.072 | 248 (23.8%) | 195 (18.7%) | 0.125 |
| **Apixaban during baseline;  n (%)** | 2,005 (23.9%) | 1,962 (23.4%) | 0.012 | 1,490 (13.9%) | 1,524 (14.2%) | 0.009 | 742 (23.9%) | 602 (19.4%) | 0.109 | 81 (7.8%) | 55 (5.3%) | 0.101 |
| **Rivaroxaban during baseline;**  **n (%)** | 1,191 (14.2%) | 1,192 (14.2%) | 0 | 1,599 (14.9%) | 1,508 (14.0%) | 0.024 | 342 (11.0%) | 314 (10.1%) | 0.029 | 36 (3.5%) | 44 (4.2%) | 0.04 |

| **Dabigatran etexilate mesylate**  **during baseline; n (%)** | 302 (3.6%) | 316 (3.8%) | 0.009 | 707 (6.6%) | 749 (7.0%) | 0.016 | 227 (7.3%) | 258 (8.3%) | 0.037 | 146 (14.0%) | 103 (9.9%) | 0.127 |
| --- | --- | --- | --- | --- | --- | --- | --- | --- | --- | --- | --- | --- |
| **Edoxaban tosylate during**  **baseline; n (%)** | 12 (0.1%) | 8 (0.1%) | 0.014 | 14 (0.1%) | 12 (0.1%) | 0.005 | 6 (0.19%) | 11 (0.35%) | 0.031 | NA | NA | NA |
| **Warfarin sodium during**  **baseline; n (%)** | 977 (11.7%) | 1,020 (12.2%) | 0.016 | 1,299 (12.1%) | 1,310 (12.2%) | 0.003 | 421 (13.6%) | 560 (18.0%) | 0.123 | 496 (47.6%) | 534 (51.2%) | 0.073 |
| **P2Y12 agents; n (%)** | 760 (9.1%) | 840 (10.0%) | 0.033 | 895 (8.3%) | 912 (8.5%) | 0.006 | 266 (8.6%) | 293 (9.4%) | 0.031 | 31 (3.0%) | 30 (2.9%) | 0.006 |
| **Any rate control medications;**  **n (%)** | 6,494 (77.6%) | 6,432 (76.8%) | 0.018 | 8,080 (75.1%) | 7,934 (73.8%) | 0.031 | 1,921 (61.9%) | 1,875 (60.4%) | 0.03 | 904 (86.8%) | 902 (86.6%) | 0.006 |
| **Digoxin total daily dose, mg** |  |  |  |  |  |  |  |  |  |  |  |  |
| ...Mean (SD) | 177.85 (70.77) | 181.29 (84.46) | 0.044 | 214.85 (221.64) | 293.46  (1,060.79) | 0.103 | NA | NA | NA | NA | NA | NA |
| ...Median (IQR) | 125.00 (125.00–  250.00) | 125.00  (125.00–250.00) |  | 250.00  (125.00–250.00) | 250.00  (125.00–250.00) |  | NA | NA |  | NA | NA |  |
| ...Missing; n (%) | 7,877 (94.1%) | 7,884 (94.2%) |  | 10,021 (93.2%) | 10,052 (93.5%) |  | NA | NA |  | NA | NA |  |
| **Digoxin strength, n (%)** |  |  | NA |  |  | NA |  |  | NA |  |  | 0.21 |
| ...0.13 mg | NA | NA |  | NA | NA |  | NA | NA |  | 64 (57.7) | 50 (47.2) |  |
| ...0.25 mg | NA | NA |  | NA | NA |  | NA | NA |  | 47 (42.3) | 56 (52.8) |  |
| **Calcium channel blockers,**  **non-dihydropyridine; n (%)** | 1,647 (19.7%) | 1,570 (18.8%) | 0.023 | 2,137 (19.9%) | 2,035 (18.9%) | 0.024 | 452 (14.6%) | 403 (13.0%) | 0.046 | 42 (4.0%) | 17 (1.6%) | 0.145 |
| **Calcium channel blockers,**  **dihydropyridine; n (%)** | 1,563 (18.7%) | 1,658 (19.8%) | 0.029 | 1,667 (15.5%) | 1,676 (15.6%) | 0.002 | 454 (14.6%) | 514 (16.6%) | 0.053 | 210 (20.2%) | 225 (21.6%) | 0.035 |
| **Angiotensin-converting- enzyme inhibitor;  n (%)** | 2,420 (28.9%) | 2,486 (29.7%) | 0.017 | 2,973 (27.6%) | 3,103 (28.9%) | 0.027 | 867 (27.9%) | 1,035 (33.3%) | 0.118 | 256 (24.6%) | 265 (25.4%) | 0.02 |
| **Angiotensin II receptor**  **blockers (ARBs); n (%)** | 1,916 (22.9%) | 1,868 (22.3%) | 0.014 | 2,295 (21.3%) | 2,348 (21.8%) | 0.012 | 376 (12.1%) | 349 (11.2%) | 0.027 | 263 (25.2%) | 255 (24.5%) | 0.018 |
| **Aldosterone antagonists;  n (%)** | 245 (2.9%) | 248 (3.0%) | 0.002 | 288 (2.7%) | 289 (2.7%) | 0.001 | 99 (3.2%) | 120 (3.9%) | 0.037 | 46 (4.4%) | 46 (4.4%) | 0 |
| **Diuretics; n (%)** | 3,161 (37.8%) | 3,239 (38.7%) | 0.019 | 3,667 (34.1%) | 3,792 (35.3%) | 0.024 | 911 (29.3%) | 1,043 (33.6%) | 0.092 | 239 (22.9%) | 226 (21.7%) | 0.03 |
| **Proarrhythmic medications;  n (%)** | 488 (5.8%) | 543 (6.5%) | 0.027 | 601 (5.6%) | 665 (6.2%) | 0.025 | 131 (4.2%) | 155 (5.0%) | 0.037 | 26 (2.5%) | 13 (1.2%) | 0.092 |

| **Proarrhythmic medication,**  **time since last, days** |  |  |  |  |  |  |  |  |  |  |  |  |
| --- | --- | --- | --- | --- | --- | --- | --- | --- | --- | --- | --- | --- |
| ...Mean (SD) | 44.56 (53.76) | 39.97 (53.14) | 0.086 | 45.33 (54.48) | 44.70 (54.12) | 0.012 | 50.87 (39.73) | 46.0 (40.2) | 0.122 | 51 (42) | 22 (26) | 0.833 |
| ...Median (IQR) | 17.00 (1.00–  79.75) | 6.00 (1.00–  70.00) |  | 19.00 (1.00–  75.50) | 15.00 (1.00–  81.00) |  | 43.00 (13.00–  81.00) | 31.50 (17.00–  64.00) |  | 50 (10–85) | 16 (0–41) |  |
| ...Missing; n (%) | 7,885 (94.2%) | 7,830 (93.5%) |  | 10,153 (94.4%) | 10,089 (93.8%) |  | 3,060 (98.5%) | 3,052 (98.3%) |  | NA | NA | NA |
| **SGLT2 inhibitors; n (%)** | 93 (1.1%) | 88 (1.1%) | 0.006 | 113 (1.1%) | 118 (1.1%) | 0.005 | 18 (0.58%) | 32 (1.0%) | 0.051 | 2 (0.2%) | 1 (0.1%) | 0.025 |
| **Eplerenone; n (%)** | 10 (0.1%) | 12 (0.1%) | 0.007 | 24 (0.2%) | 16 (0.1%) | 0.017 | 3 (0.10%) | 1 (0.03%) | 0.025 | 3 (0.39%) | 3 (0.3%) | 0 |
| **Spironolactone; n (%)** | 249 (3.0%) | 252 (3.0%) | 0.002 | 290 (2.7%) | 292 (2.7%) | 0.001 | 98 (3.2%) | 124 (4.0%) | 0.045 | 43 (4.1%) | 43 (4.1%) | 0 |
| **Angiotensin receptor- neprilysin inhibitor (ARNi);  n (%)** | 10 (0.1%) | 30 (0.4%) | 0.049 | 6 (0.1%) | 9 (0.1%) | 0.011 | 8 (0.26%) | 8 (0.26%) | 0 | NA | NA | NA |
| **Body mass index** |  |  | NA |  |  | NA |  |  | 0.101 |  |  | NA |
| ...<18.5 kg/m2 | NA | NA |  | NA | NA |  | 16 (0.52%) | 22 (0.71%) |  | NA | NA |  |
| ...18.5 to <25 kg/m2 | NA | NA |  | NA | NA |  | 431 (13.9%) | 408 (13.1%) |  | NA | NA |  |
| ...25 to <30 kg/m2 | NA | NA |  | NA | NA |  | 1,019 (32.8%) | 978 (49.0%) |  | NA | NA |  |
| ...30+ kg/m2 | NA | NA |  | NA | NA |  | 1,482 (47.7%) | 1,514 (48.7%) |  | NA | NA |  |
| ...Unknown | NA | NA |  | NA | NA |  | 158 (5.1%) | 184 (5.9%) |  | NA | NA |  |
| **Alcohol-related diagnoses, n (%)** | NA | NA | NA | NA | NA | NA | NA | NA | NA | 9 (0.9) | 1 (2.1) | 0.103 |
| **Left ventricular ejection**  **fraction %, n (%)** |  |  |  |  |  |  |  |  |  |  |  |  |
| ...Mean (SD) | NA | NA | NA | NA | NA | NA | 57.65 (9.73) | 55.40 (11.45) | 0.216 | NA | NA | NA |
| ...Median (IQR) | NA | NA |  | NA | NA |  | 60.00 (55.00–  65.00) | 58.00 (50.00–  65.00) |  | NA | NA |  |
| ...Missing; n (%) | NA | NA |  | NA | NA |  | 1,401 (45.1%) | 1,771 (57.0%) |  | NA | NA |  |

AF=atrial fibrillation; ASD=absolute standardized difference; ECG=electrocardiogram; IQR=interquartile range; MarketScan=Merative MarketScan database; NA=not assessed; NPR=National Patient Register; Optum=Optum CDM DOD database; SD=standard deviation; SGLT2=sodium-glucose cotransporter-2; VHA EHR=Veterans Health Administration Electronic Health Record.

# Supplemental Table 5. Incidence Rates for Outcomes of CV Hospitalization, Ventricular Arrhythmias, and Bradyarrhythmias Associated With Syncope or Pacemaker Implant Among Propensity Score–Matched Patients With AF Newly Initiating Dronedarone Versus Sotalol in the Outpatient Setting

| **Variable** | **Incidence Rates Per 100 Person-Years (95% CI) at 24 months** | | | | | | | |
| --- | --- | --- | --- | --- | --- | --- | --- | --- |
|  | **Optum** | | **MarketScan** | | **VHA EHR** | | **Swedish NPR** | |
|  | **Dronedarone** | **Sotalol** | **Dronedarone** | **Sotalol** | **Dronedarone** | **Sotalol** | **Dronedarone** | **Sotalol** |
| Number of patients | 8,373 | 8,373 | 10,754 | 10,754 | 3,106 | 3,106 | 1,042 | 1,042 |
| **CV hospitalization** |  |  |  |  |  |  |  |  |
| n (%) with outcome by 24 months | 459 (5.5%) | 650 (7.8%) | 595 (5.5%) | 770 (7.2%) | 250 (8.0%) | 270 (8.7%) | 30 (5.7%) | 26 (5.7%) |
| Incidence rates per 100 person-years (95% CI) at 24 months | 10.8 (9.9–11.9) | 10.8 (10.0–11.7) | 11.1 (10.3–12.1) | 10.7 (10.0–11.5) | 10.2 (9.0–11.6) | 10.7 (9.5–12.0) | 3.8 (2.7–5.4) | 3.4 (2.3–4.9) |
| **Ventricular arrhythmias** |  |  |  |  |  |  |  |  |
| n (%) with outcome by 24 months | 217 (2.6%) | 373 (4.5%) | 237 (2.2%) | 333 (3.1%) | 44 (1.4%) | 91(2.9%) | 2 (0.3%) | 6 (1.1%) |
| Incidence rates per 100 person-years (95% CI) at 24 months | 5.1 (4.4–5.8) | 6.1 (5.5–6.8) | 4.4 (3.9–5.0) | 4.5 (4.1–5.1) | 1.8 (1.3–2.4) | 3.4 (2.7–4.2) | 0.2 (0.1–0.9) | 0.7 (0.3–1.6) |
| **Bradyarrhythmias associated with syncope or pacemaker implant** |  |  |  |  |  |  |  |  |
| n (%) with outcome by 24 months | 111 (1.3%) | 207 (2.5%) | 109 (1.0%) | 186 (1.7%) | 23 (0.74%) | 47 (1.5%) | 1 (0.2%) | 1 (0.2%) |
| Incidence rates per 100 person-years (95% CI) at 24 months | 4.3 (3.7–5.0) | 5.0 (4.5–5.6) | 2.6 (2.2–3.0) | 3.2 (2.8–3.6) | 0.9 (0.6–1.4) | 1.7 (1.2–2.2) | 0.1 (0.0–0.8) | 0.1 (0.0–0.9) |

AF=atrial fibrillation; CI=confidence interval; CV=cardiovascular; MarketScan=Merative MarketScan database; NPR=National Patient Register; Optum=Optum CDM DOD database; VHA EHR=Veterans Health Administration Electronic Health Record.

# Additional Sensitivity Analysis Results

Results of additional sensitivity analyses are presented in Supplemental Table 6.

# Duration of Covariate Assessment Period

For the sensitivity analysis in which covariates were assessed over all available data prior to index, pooled effect estimates for CV hospitalization and ventricular arrhythmias were similar to those in the primary analysis.

# ITT Analysis

For the analysis conducted using an ITT approach, no difference was observed in the hazard of CV hospitalization between the dronedarone and sotalol arms. A lower hazard for ventricular arrhythmias was observed in patients treated with dronedarone, although the effect was less pronounced than in the primary analysis.

# QT Prolongation

In the Optum, MarketScan, and VHA EHR databases, the analysis examining a composite endpoint of ventricular arrhythmias and QT prolongation resulted in a pooled HR similar to that in the primary analysis.

# CV Hospitalization Definition

For the analysis in which the CV-related hospitalization endpoint was defined using any diagnosis position, compared with the primary analysis, the pooled effect estimate was closer to the null.

# Use of Proarrhythmic Drugs

For the analysis in which the use of proarrhythmic drugs was included in the PS model, the pooled effect estimate for ventricular arrhythmias was similar to that in the primary analysis.

# Exclusion of Patients With Recent Atrial Flutter Diagnoses

In the Optum, MarketScan, and VHA EHR databases, the analysis that excluded patients with an atrial flutter diagnosis in the baseline period resulted in pooled effect estimates for the primary endpoints similar to those in the primary analysis.

# Prescriber Specialty of Index Therapy

For the analysis in Optum in which prescriber specialty of index therapy was included in the PS model, compared with the primary analysis, results for the primary outcomes were closer to the null.

# Supplemental Table 6. Sensitivity Analysis Effect Estimates for Outcomes of CV Hospitalization and Ventricular Arrhythmias Among Propensity Score–Matched Patients With AF Newly Initiating Dronedarone Versus Sotalol in the Outpatient Setting

| **Analysis** | **Database(s)** | **HR (95% CI)** | |
| --- | --- | --- | --- |
| **CV Hospitalization** | **Ventricular Arrhythmias** |
| Primary analysis | All databases | 0.91 (0.85–0.97) | 0.77 (0.69–0.85) |
| Assessing covariates over all | All databases | 0.90 (0.84–0.96) | 0.78 (0.70–0.87) |
| available time |  |  |  |
| Intention-to-treat analysis | All databases | 1.00 (0.96–1.04) | 0.88 (0.82–0.93) |
| QT prolongation | Optum, MarketScan, and VHA EHR databases | NA | 0.77 (0.69–0.86)a |
| CV hospitalization definition | All databases | 0.95 (0.91–1.00) | NA |
| Use of proarrhythmic drugs | All databases | NA | 0.78 (0.70–0.86) |
| Exclusion of patients with recent atrial flutter diagnoses | Optum, MarketScan, and VHA EHR databases | 0.91 (0.84–0.98) | 0.74 (0.65–0.83) |
| Primary analysis | Optum | 0.86 (0.76–0.96) | 0.76 (0.65–0.90) |
| Prescriber specialty of index therapy | Optum | 0.90 (0.80–1.01) | 0.79 (0.67–0.92) |

AF=atrial fibrillation; CI=confidence interval; CV=cardiovascular; HR=hazard ratio; MarketScan=Merative MarketScan database; NA=not assessed; Optum=Optum CDM DOD database; VHA EHR=Veterans Health Administration Electronic Health Record.

aRepresents the HR for the composite endpoint of ventricular arrhythmias and QT prolongation.

# Measure Definitions

- 1. **Exposure Definitions**

| **Exposure** | **Optum, MarketScan, and VHA EHR Database Definition** | **Swedish NPR Database Definition** |
| --- | --- | --- |
| Dronedarone | Any outpatient prescription claim/record with the generic name “Dronedarone HCL” | Any prescription claim with the following ATC code: C01BD07 (Dronedarone) |
| Sotalol | Any outpatient prescription claim/record with the generic name “Sotalol HCL” | Any prescription claim with the following ATC code: C07AA07 (Sotalol) |
| Class I or class III AAD | Any outpatient prescription claims/records with the following generic names: “Dronedarone HCL,” “Sotalol HCL,” “Amiodarone HCL,” “Flecainide Acetate,” “Propafenone,” “Dofetilide,” or “Disopyramide Phosphate” | Any prescription claim with the following ATC codes: C01BD07 (Dronedarone), C07AA07 (Sotalol), C01BD01 (Amiodarone), C01BC03 (Propafenone), C01BC04 (Flecainide), or C01BA03 (Disopyramide) |

AAD=antiarrhythmic drug; ATC=Anatomical Therapeutic Chemical; HCL=hydrochloride; MarketScan=Merative MarketScan database; NPR=National Patient Register;
Optum=Optum CDM DOD database; VHA EHR=Veterans Health Administration Electronic Health Record.

# Outcome Definitions

| **Outcome** | ***ICD-9-CM* Definition**** | ***ICD-10-CM* Definition** | ***ICD-10-SE* Definition** | **Validation Statistics** |
| --- | --- | --- | --- | --- |
| Objective 1/2 Primary Outcome component: Cardiovascular-related hospitalization | The occurrence of “Objective 1/2 Primary Outcome Component: Myocardial Infarction” or “Objective 1/2 Primary Outcome Component: Ischemic Stroke or Transient Ischemic Attack” or “Objective 1/2 Primary Outcome Component: Heart Failure Hospitalization” or “Objective 1/2 Primary Outcome Component: Atrial Fibrillation Hospitalization,” each of which are defined below | The occurrence of “Objective 1/2 Primary Outcome Component: Myocardial Infarction” or “Objective 1/2 Primary Outcome Component: Ischemic Stroke or Transient Ischemic Attack” or “Objective 1/2 Primary Outcome Component: Heart Failure Hospitalization” or “Objective 1/2 Primary Outcome Component: Atrial Fibrillation Hospitalization,” each of which are defined below | The occurrence of “Objective 1/2 Primary Outcome Component: Myocardial Infarction” or “Objective 1/2 Primary Outcome Component: Ischemic Stroke or Transient Ischemic Attack” or “Objective 1/2 Primary Outcome Component: Heart Failure Hospitalization” or “Objective 1/2 Primary Outcome Component: Atrial Fibrillation Hospitalization,” each of which are defined below | See components below |
| Objective 1/2 Primary Outcome component: Myocardial infarction hospitalization | Any inpatient encounter with an *ICD-9-CM* diagnosis code of 410, 410.0, 410.*0, 410.*1, 410.1, 410.2,  410.3, 410.4, 410.5, 410.6, 410.7,  410.8, or 410.9 measured in the primary diagnosis position | Any inpatient encounter with an *ICD-10-CM* diagnosis code of I21.0*, I21.1*, I21.2*, I21.3*, I21.4,  I21.9*, I21.A*, or I22.* measured in the primary diagnosis position | Any inpatient encounter with an *ICD-10-SE* diagnosis code of I21*, I22* measured in the primary diagnosis position | *ICD-9-CM* discharge code 410 (excluding 410.*2)31: Sensitivity: 0.61 (0.57, 0.66) in  females, 0.65 (0.60, 0.69) in males  Specificity: 0.988 (0.986, 0.990) in  females, 0.982 (0.979, 0.985) in males  PPV: 0.67 (0.63, 0.71) in females,  0.67 (0.63, 0.71) in males |

| **Outcome** | ***ICD-9-CM* Definition**** | ***ICD-10-CM* Definition** | ***ICD-10-SE* Definition** | **Validation Statistics** |
| --- | --- | --- | --- | --- |
| Objective 1/2 Primary Outcome component: Ischemic stroke or transient ischemic attack hospitalization | Any inpatient encounter with an  *ICD-9-CM* diagnosis code of 362.3*, 430, 431, 432.*, 433.*1, 434.* (with  the exception of 434.90), 435.*, 438.*, or 997.02 measured in the primary diagnosis position | Any inpatient encounter with an *ICD-10-CM* diagnosis code of G45.*, G97.3*, I60.*, I61.*, I63.*,  I97.81*, or I97.82* measured in the primary diagnosis position | (Ischemic stroke and TIA will be reported separately.)  Ischemic stroke: Any inpatient encounter with an *ICD-10-SE* diagnosis code of I60.*, I61.*, or I63* in the primary diagnosis position  TIA: Any inpatient encounter with an *ICD-10-SE* diagnosis code of G45* in the primary diagnosis position | Sensitivity for the following group of ischemic stroke–related *ICD-9-CM* diagnosis codes in any position on hospital discharge records: 433.*1, 434.*1, 436.32  PPV: 75% (73-77)  Sensitivity: 80% (78-82) |
| Objective 1/2 Primary Outcome component: Heart failure hospitalization | Any inpatient encounter with an *ICD-9-CM* diagnosis code of 428.* measured in the primary diagnosis position | Any inpatient encounter with an *ICD-10-CM* diagnosis code of I11.0,  I13.0, I13.2, or I50.* measured in the primary diagnosis position | Any inpatient encounter with overnight stay and an *ICD-10-SE* diagnosis code of I11.0, I13.0, I13.2, or I50 in the primary diagnosis position | *ICD-9-CM* code in the primary or secondary position on discharge record33:  83.5% PPV  87.4% NPV  62.8% sensitivity  95.4% specificity |
| Objective 1/2 Primary Outcome component: Atrial fibrillation hospitalization | Any inpatient encounter with an *ICD-9-CM* diagnosis code of 427.31 measured in the primary diagnosis position | Any inpatient encounter with an *ICD-10-CM* diagnosis code of I48.0  (paroxysmal), I48.1, I48.11 or I48.19 (persistent), I48.2*, or I48.91 measured in the primary diagnosis position | Any inpatient encounter with an *ICD- 10-SE* diagnosis code of I48*. in the primary diagnosis position | *ICD-9-CM* code in any position on inpatient record34:  89% PPV for any AF  62% PPV for incident AF  84% sensitivity and 98% specificity for prevalent AF  *ICD-9-CM* code in any position on inpatient record35:  85% PPV for AF present during hospitalization  *ICD-9-CM* code(s) in primary or secondary position on inpatient record36:  97% PPV for any history of AF |

| **Outcome** | ***ICD-9-CM* Definition**** | ***ICD-10-CM* Definition** | ***ICD-10-SE* Definition** | **Validation Statistics** |
| --- | --- | --- | --- | --- |
| Objective 3 Primary Outcome: Ventricular arrhythmias | Defined by its components below (ventricular fibrillation and flutter, ventricular tachycardia, torsade de pointes, reentry ventricular arrhythmia, cardiac arrest) | Defined by its components below (ventricular fibrillation and flutter, ventricular tachycardia, torsade de pointes, reentry ventricular arrhythmia, cardiac arrest) | Defined by its components below (ventricular fibrillation and flutter, ventricular tachycardia, reentry ventricular arrhythmia, cardiac arrest) | See components below |
| Objective 3 Primary Outcome: Ventricular fibrillation and flutter | Any inpatient or ambulatory encounter with an *ICD-9-CM* diagnosis code of 427.41 or  427.42 measured in any diagnosis position (e.g., primary, secondary) | Any inpatient or ambulatory encounter with an *ICD-10-CM* diagnosis code of I49.0* measured in any diagnosis position (e.g., primary, secondary) | Any inpatient or ambulatory encounter or entry in the cause of death register with an *ICD-10-SE* diagnosis code of I49.0* measured in any diagnosis position (e.g., primary, secondary) | *ICD-9-CM* code in the primary position on discharge record for ventricular tachycardia or ventricular fibrillation/cardiac arrest37:  Specificity: 94%  Sensitivity: 77%  PPV: 93% |
| Objective 3 Primary Outcome: Ventricular tachycardia | Any inpatient or ambulatory encounter with an *ICD-9-CM* diagnosis code of 427.1 measured in any diagnosis position (e.g., primary, secondary) | Any inpatient or ambulatory encounter with an *ICD-10-CM* diagnosis code of I47.2 measured in any diagnosis position (e.g., primary, secondary) | Any inpatient or ambulatory encounter or entry in the cause of death register with an *ICD-10-SE* diagnosis code of I47.2 measured in any diagnosis position (e.g., primary, secondary) | *ICD-9-CM* code in the primary position on discharge record for ventricular tachycardia or ventricular fibrillation/cardiac arrest37:  Specificity: 94%  Sensitivity: 77%  PPV: 93% |

| **Outcome** | ***ICD-9-CM* Definition**** | ***ICD-10-CM* Definition** | ***ICD-10-SE* Definition** | **Validation Statistics** |
| --- | --- | --- | --- | --- |
| Objective 3 Primary Outcome: Torsade de pointes | Any inpatient or ambulatory encounter with an *ICD-9-CM* diagnosis code of 426.82 measured in any diagnosis position (e.g., primary, secondary) | Any inpatient or ambulatory encounter with an *ICD-10-CM* diagnosis code of I45.81 measured in any diagnosis position (e.g., primary, secondary) | NA (Information not available in the Swedish NPR database) | NA |
| Objective 3 Primary Outcome: Re- entry ventricular arrhythmia | NA | Any inpatient or ambulatory encounter with an *ICD-10-CM* diagnosis code of I47.0 measured in any diagnosis position (e.g., primary, secondary) | Any inpatient or ambulatory encounter or entry in the cause of death register with an *ICD-10-SE* diagnosis code of I47.0 measured in any diagnosis position (e.g., primary, secondary) | NA |
| Objective 3 Primary Outcome: Cardiac arrest | Any inpatient or ambulatory encounter with an *ICD-9-CM* diagnosis code of 427.5 measured in any diagnosis position (e.g., primary, secondary) | Any inpatient or ambulatory encounter with an *ICD-10-CM* diagnosis code of I46.* measured in any diagnosis position (e.g., primary, secondary) | Any inpatient or ambulatory encounter or entry in the cause of death register with an *ICD-10-SE* diagnosis code of I46.* measured in any diagnosis position (e.g., primary, secondary) | *ICD-9-CM* code in the primary position on discharge record for ventricular tachycardia or ventricular fibrillation/cardiac arrest37:  Specificity: 94%  Sensitivity: 77%  PPV: 93% |

| **Outcome** | ***ICD-9-CM* Definition**** | ***ICD-10-CM* Definition** | ***ICD-10-SE* Definition** | **Validation Statistics** |
| --- | --- | --- | --- | --- |
| Secondary Objective 1: All-cause mortality | Any death recorded in the VHA EHR database | Any death recorded in the VHA EHR database | Death record due to any cause in the Swedish Cause of Death Register | NA |
| Secondary Objective 2: Composite of ventricular arrhythmias and all- cause mortality | See above definitions of ventricular arrhythmias and all-cause mortality | See above definitions of ventricular arrhythmias and all-cause mortality | See above definitions of ventricular arrhythmias and all-cause mortality | NA |
| Secondary Objective 3: Bradyarrhythmias associated with syncope or pacemaker implant | Defined by its components below (bradycardia, sick sinus syndrome, AV block, 3rd and 2nd degree, pacemaker insertion) | Defined by its components below (bradycardia, sick sinus syndrome, AV block, 3rd and 2nd degree, pacemaker insertion) | Defined by its components below (bradycardia, sick sinus syndrome, AV block, 3rd and 2nd degree, pacemaker insertion) | NA |
| Secondary Objective 3: Bradyarrhythmias associated with syncope or pacemaker implant component: Bradycardia | Any inpatient or ambulatory encounter with an *ICD-9-CM* diagnosis code of 427.8* measured in any diagnosis position (e.g., primary, secondary) | Any inpatient or ambulatory encounter with an *ICD-10-CM* diagnosis code of R00.1 measured in any diagnosis position (e.g., primary, secondary) | Any inpatient or ambulatory encounter with an *ICD-10-SE* diagnosis code of R00.1 measured in any diagnosis position (e.g., primary, secondary) | NA |
| Secondary Objective 3: Bradyarrhythmias associated with syncope or pacemaker implant component: Sick sinus syndrome | Any inpatient or ambulatory encounter with an *ICD-9-CM* diagnosis code of 427.81 measured in any diagnosis position (e.g., primary, secondary) | Any inpatient or ambulatory encounter with an *ICD-10-CM* diagnosis code of I49.5 measured in any diagnosis position (e.g., primary, secondary) | Any inpatient or ambulatory encounter with an *ICD-10-SE* diagnosis code of I49.5 measured in any diagnosis position (e.g., primary, secondary) | NA |
| Secondary Objective 3: Bradyarrhythmias associated with syncope or pacemaker implant component: AV block, 3rd and 2nd degree | Any inpatient or ambulatory encounter with an *ICD-9-CM* diagnosis code of 426.0 or  426.13 measured in any diagnosis position (e.g., primary, secondary) | Any inpatient or ambulatory encounter with an *ICD-10-CM* diagnosis code of I44.1 or I44.2 measured in any diagnosis position (e.g., primary, secondary) | Any inpatient or ambulatory encounter before index with an *ICD- 10-SE* diagnosis code of I44.1 or I44.2 | NA |
| Secondary Objective 3: Bradyarrhythmias associated with syncope or pacemaker implant component: Pacemaker insertion | Any inpatient or ambulatory encounter with ≥1 of the following procedure codes:  *ICD-9-CM*: 00.50, 00.52, 00.53,  37.78, 37.81, 37.82, 37.83 | Any inpatient or ambulatory encounter with ≥1 of the following procedure codes: | NA | NA |

| **Outcome** | ***ICD-9-CM* Definition**** | ***ICD-10-CM* Definition** | ***ICD-10-SE* Definition** | **Validation Statistics** |
| --- | --- | --- | --- | --- |
|  | CPT/HCPCS: 0387T, 33206, 33207,  33208, 33212, 33213, 33214, 33221,  33227 | *ICD-10-CM*: 0JH604Z, 0JH605Z, 0JH606Z,  0JH607Z, 0JH634Z, 0JH635Z,  0JH636Z, 0JH637Z, 0JH63PZ,  0JH804Z, 0JH805Z, 0JH806Z,  0JH807Z, 0JH80PZ, 0JH834Z,  0JH835Z, 0JH836Z, 0JH837Z,  0JH83PZ, 0JH605Z  CPT/HCPCS: 0387T, 33206, 33207,  33208, 33212, 33213, 33214, 33221,  33227 |  |  |
| Negative control outcome: Infection | Any inpatient or ambulatory encounter with a length of stay ≥3 days and an *ICD-9-CM* diagnosis code of 79.7, 038.0, 038.2, 047*,  049.1, 049.0, 054.3, 320* (except for  320.7), 323.41, 421*, 424.91, 482*,  528.3, 590.2, 682.0, 711.0*, 730.0*,  730.1*, 730.2* (excluding 730.28),  730.9* (excluding 730.98), 771.831  measured in any diagnosis position (e.g., primary, secondary) | Any inpatient encounter with a length of stay ≥3 days and with an *ICD-10-CM* diagnosis code of G00.*, A87.*, G05.3, B00.4, K12.2, L03.21*, I39, I33.*, J14, J15.*, N15.1, M00.*, M86.*, A40.9, A40.3,  or R78.81 measured in the primary discharge diagnosis code field*** | Any inpatient encounter with a length of stay ≥3 days and with an *ICD-10-SE* diagnosis code measured in the primary discharge diagnosis code field of G00.*, A87.*, B00.4, K12.2, L03.2, J14, J15.*, N15.1, M00.*, M86.*, A40.9, or A40.3 or  I39 or I33.* among patients with no prior history of these diagnoses | NA |
| Negative control outcome: Hip fractures | Any inpatient or ambulatory encounter with an *ICD-9-CM* diagnosis code of 820*, 905.3, V54.13, or V54.15 measured in any diagnosis position (e.g., primary, secondary) | Any inpatient encounter with an *ICD-10-CM* diagnosis code of S72.0*, S72.1*, or S72.2* | Any inpatient encounter with an *ICD-10-CM* diagnosis code of S72.0*, S72.1*, or S72.2* | NA |
| Negative control outcome: Cancer | Any inpatient or ambulatory encounter with an *ICD-9-CM* diagnosis code of 140.*–209.* (except 173.*) or 238.4 measured in any diagnosis position (e.g., primary, secondary) | Any inpatient or ambulatory encounter with an *ICD-10-CM* diagnosis code of C* (except C44.*) or D45 measured in any diagnosis position (e.g., primary, secondary) | Any inpatient or ambulatory encounter with an *ICD-10-SE* diagnosis code of C* (except C44.*) | NA |

| **Outcome** | ***ICD-9-CM* Definition**** | ***ICD-10-CM* Definition** | ***ICD-10-SE* Definition** | **Validation Statistics** |
| --- | --- | --- | --- | --- |
| Negative control outcome: Incident diabetes | NA | NA | Any inpatient or ambulatory encounter with an *ICD-10-SE* diagnosis code of E10*–14* | NA |
| Negative control outcome: Pneumonia | NA | NA | Any inpatient or ambulatory encounter with an *ICD-10-SE* diagnosis code of J12*–18* | NA |
| Negative control outcome: Fall accident | NA | NA | Any inpatient or ambulatory encounter with an *ICD-10-SE* diagnosis code of W00*–19* | NA |
| Negative control outcome: Incident osteoarthritis | NA | NA | Any inpatient or ambulatory encounter with an *ICD-10-SE* diagnosis code of M15*–19* | NA |

AF=atrial fibrillation; AV=atrioventricular; CM=Clinical Modification; CPT=Current Procedural Terminology; HCPCS=Healthcare Common Procedure Coding System; *ICD*=*International Classification of Diseases*; NA=not assessed; NPV=negative predictive value; PPV=positive predictive value; SE=Swedish Edition; TIA=transient ischemic attack; VHA EHR=Veterans Health Administration Electronic Health Record.

*****Symbolizes any number of coding positions with any value are acceptable codes.

**The Outcome Assessment Period begins after the transition to *ICD-10-SE* for diagnosis coding in Sweden; *ICD-9-CM* codes will be used in US analyses only.

***Derived from cross-walking a validated *ICD-9* algorithm for the identification of serious bacterial infections (including meningitis, encephalitis, cellulitis, endocarditis, pneumonia, pyelonephritis, septic arthritis, osteomyelitis, and bacteremia) to *ICD-10*.38

# Inclusion Criteria Definitions

| **Variable** | **Optum, MarketScan, and VHA EHR Database Definition** | **Swedish NPR Database Definition** |
| --- | --- | --- |
| Atrial fibrillation | Any inpatient or ambulatory encounter with an *ICD-9-CM* diagnosis code of 427.31 or *ICD-10-CM* diagnosis code of I48* measured in any diagnosis position (e.g., primary, secondary) | Any inpatient or ambulatory encounter with an *ICD-10-SE* diagnosis code of I48* |

CM=Clinical Modification; *ICD*=*International Classification of Diseases*; MarketScan=Merative MarketScan database; NPR=National Patient Register; Optum=Optum CDM DOD database;
SE=Swedish Edition; VHA EHR=Veterans Health Administration Electronic Health Record.

*Symbolizes any number of coding positions with any value are acceptable codes.

# Exclusion Criteria Definitions

| **Variable** | ***ICD-9-CM***** | ***ICD-10-CM*** | ***ICD-10-SE*** |
| --- | --- | --- | --- |
| AAD prescriptions | See Section 3.1 | See Section 3.1 | See Section 3.1 |
| Atrial flutter (sensitivity analysis only) | Any inpatient or ambulatory encounter with an *ICD-9-CM* diagnosis code of 427.32 measured in any diagnosis position (e.g., primary, secondary) | Any inpatient or ambulatory encounter with an *ICD-10-CM* diagnosis code of I48.3, I48.4, or I48.92 measured in any diagnosis position (e.g., primary, secondary) | NA |
| Cancer | Any inpatient or ambulatory encounter with an *ICD-9-CM* diagnosis code of 140.*–209* (except 173.*) or 238.4 measured in any diagnosis position (e.g., primary, secondary) | Any inpatient or ambulatory encounter with an *ICD-10-CM* diagnosis code of C* (except C44.*) or D45 measured in any diagnosis position (e.g., primary, secondary) | Any inpatient or ambulatory encounter with an *ICD-10-SE* diagnosis code of C* (except C44.*) or D45 measured in any diagnosis position |
| Heart failure hospitalization | Any inpatient encounter with an *ICD-9-CM* diagnosis code of 428.* measured in the primary diagnosis position | Any inpatient encounter with an *ICD-10-CM* diagnosis code of I11.0, I13.0, I13.2,  or I50.* measured in the primary diagnosis position | Hospitalization with overnight stay and *ICD- 10-SE* diagnosis code I50* as the principal diagnosis |
| ESRD including dialysis and kidney transplant | Any inpatient or ambulatory encounter with the following: | Any inpatient or ambulatory encounter with the following: | Any inpatient or ambulatory encounter with an |
|  | an *ICD-9-CM* diagnosis code of 403.01, 403.11, 403.91, 404.02, 404.03, 404.12,  404.13, 404.92, 404.93, 585.6, 586, V42.0, | an *ICD-10-CM* diagnosis code of I12.0, I13.11, I13.2, N18.6, N19, Z94.0, Z91.15, or Z99.2; or | *ICD-10-SE* diagnosis code of N18.5, Z992, or Z492; a KVÅ-procedure code of DR016 or DR024; or a NOMESCO surgical code beginning with KAS |
|  | V45.1, or V56.*; or | an *ICD-10-CM* procedure code of 0TY00Z0, |  |
|  | an *ICD-9-CM* procedure code of 38.95, 39.27, | 0TY00Z1, 0TY00Z2, 0TY10Z0, 0TY10Z1, |  |
|  | 39.42, 39.95, 54.98, 55.52, 55.53, or 55.54; or | 0TY10Z2, 5A1D00Z, 5A1D60Z, 5A1D70Z, |  |
|  | a CPT/HCPCS code of 00862, 00868, 50300, | 5A1D80Z, 5A1D90Z, or 3E1M39Z; or |  |
|  | 50320, 50323, 50325, 50327, 50328, 50329, | a CPT/HCPCS code of 00862, 00868, 50300, |  |
|  | 50340, 50360, 50365, 50370, 50380, 50547, | 50320, 50323, 50325, 50327, 50328, 50329, |  |
|  | 90935–90999; or | 50340, 50360, 50365, 50370, 50380, 50547, |  |
|  | a Revenue code of 0800, 0801, 0802, 0803, | or 90935–90999; or |  |
|  | or 0804 | a Revenue code of 0800, 0801, 0802, 0803, |  |
|  | in any diagnosis position (e.g., primary, secondary) | or 0804 |  |
|  |  | in any diagnosis position (e.g., primary, secondary) |  |

| **Variable** | ***ICD-9-CM***** | ***ICD-10-CM*** | ***ICD-10-SE*** |
| --- | --- | --- | --- |
| Severe hepatic impairment | Any inpatient or ambulatory encounter with an *ICD-9-CM* diagnosis code of 070.22, 070.23,  070.32, 070.33, 070.44, 070.54, 070.6, 070.9,  456.0–456.2*, 570.*, 571.*, 572.2–572.8,  573.3, 573.4, 573.8, 573.9, or V42.7 measured  in any diagnosis position (e.g., primary, secondary) | Any inpatient or ambulatory encounter with an *ICD-10-CM* diagnosis code of I86.4, K70.1*–K70.4*, K71.*, K72.*, or K76.5–K76.7  measured in any diagnosis position (e.g., primary, secondary) | Any inpatient or ambulatory encounter with an *ICD-10-SE* diagnosis code beginning with I86.4, K70.1, K70.2, K70.3, K70.4, K71, K72, K76.5, K76.6, or K76.7 |
| Pacemaker insertion | See Section 3.2 | See Section 3.2 | See Section 3.2 |
| Implantable cardioverter-defibrillator insertion | Any inpatient or ambulatory encounter with ≥1 of the following procedure codes:  *ICD-9-CM*: 37.94  CPT/HCPCS: 33230, 33231, 33240, 33249,  or 33270 | Any inpatient or ambulatory encounter with ≥1 of the following procedure codes:  *ICD-10-CM*: 0JH608Z, 0JH609Z, 0JH638Z, 0JH808Z, 0JH838Z  CPT/HCPCS: 33230, 33231, 33240, 33249,  or 33270 | *ICD-10-SE*: Z95.0, Z45.0  NOMESCO code: FPG10, FPG 20, FPG 30, FPG 33, FPG 50, FPF00, FPF10, FPF20 |
| CRT-D insertion | Any inpatient or ambulatory encounter with ≥1 of the following procedure codes:  *ICD-9-CM*: 00.51, 00.54  CPT/HCPCS: 33249 | Any inpatient or ambulatory encounter with ≥1 of the following procedure codes:  *ICD-10-CM*: 0JH609Z, 0JH639Z, 0JH809Z, 0JH839Z  CPT/HCPCS: 33249 | NOMESCO code: FPG36 |
| AV block, 2nd or 3rd degree | See Section 3.2 | See Section 3.2 | See Section 3.2 |
| Ventricular arrhythmias | See Section 3.2 | See Section 3.2 | See Section 3.2 |
| Atrial fibrillation-related hospitalization (sensitivity analysis only) | Any inpatient encounter with an *ICD-9-CM* diagnosis code of 427.31 measured in any diagnosis position (e.g., primary, secondary) | Any inpatient encounter with an *ICD-10-CM* diagnosis code of I48* measured in any diagnosis position (e.g., primary, secondary) | Any inpatient encounter with an *ICD-10-SE* diagnosis code of I48* |

| **Variable** | ***ICD-9-CM***** | ***ICD-10-CM*** | ***ICD-10-SE*** |
| --- | --- | --- | --- |
| Sotalol (total daily dose) | Among patients initiating sotalol on cohort entry, total daily dose will be calculated based on the drug strength, quantity dispensed, and days’ supply using the following formula: (drug strength [in mg]*quantity dispensed)/days’ supply.  Prescriptions with days’ supply <0 or >365 or quantity dispensed <0 or >600 will be excluded. If multiple prescriptions were filled on the same day, concurrent use of the drug will be assumed. If prescriptions were filled on different days but overlap with each other, sequential use will be assumed. The start date will be shifted to 1 day after the run-out date of the previous prescription or 30 days after the prescription fill date (whichever occurred earlier) | Among patients initiating sotalol on cohort entry, total daily dose will be calculated based on the drug strength, quantity dispensed, and days’ supply using the following formula: (drug strength [in mg]*quantity dispensed)/days’ supply.   Dispensed medications with days’ supply <0 or >365 or quantity dispensed <0 or >600 will be excluded. If multiple prescriptions were filled on the same day, concurrent use of the drug will be assumed. If prescriptions were filled on different days but overlap with each other, sequential use will be assumed. The start date will be shifted to 1 day after the run-out date of the previous prescription or 30 days after the prescription fill date (whichever occurred earlier) | NA |

AAD=antiarrhythmic drug; AV=atrioventricular; CM=Clinical Modification; CPT=Current Procedural Terminology; CRT-D=cardiac resynchronization therapy defibrillator; ESRD=end-stage renal disease; HCPCS=Healthcare Common Procedure Coding System; *ICD*=*International Classification of Diseases*; KVÅ=Classification of Health Interventions (Klassifikation av vårdåtgärder); NA=not assessed; NOMESCO=Nordic Medico-Statistical Committee; SE=Swedish Edition.

*Symbolizes any number of coding positions with any value are acceptable codes.

**The Outcome Assessment Period begins after the transition to *ICD-10-SE* for diagnosis coding in Sweden; *ICD-9-CM* codes will be used in US analyses only.

# Baseline Clinical Characteristics and Healthcare Resource Utilization Definitions

| **Variable** | ***ICD-9-CM***** | ***ICD-10-CM*** | ***ICD-10-SE*** |
| --- | --- | --- | --- |
| Type of atrial fibrillation (AF) | Patients receiving only *ICD-9-CM* diagnoses of AF (defined below) during the baseline period will be classified as unknown AF  Unknown AF  The occurrence of a medical claim with an *ICD-9-CM* | Patients receiving *ICD-10-CM* diagnoses for unspecified AF (defined below) during the baseline period and no diagnoses for other AF types will be classified as unspecified AF. Otherwise, patients will be classified based on their AF type diagnosis representing the most advanced stage of the disease as follows: paroxysmal < persistent < permanent | NA |
|  | diagnosis of 427.31 measured in any diagnosis position from the Medical Services table | Paroxysmal AF  The occurrence of a medical claim with an *ICD-10-CM* diagnosis of I48.0 measured in any diagnosis position from the Medical Services table  Persistent AF  The occurrence of a medical claim with an *ICD-10-CM* diagnosis of I48.1, I48.11, or I48.19 measured in any diagnosis position from the Medical Services table  Permanent AF  The occurrence of a medical claim with an *ICD-10-CM* diagnosis of I48.2 measured in any diagnosis position from the Medical Services table  Unspecified AF  The occurrence of a medical claim with an *ICD-10-CM* diagnosis of I48.3, I48.4, or I48.9* measured in any diagnosis position from the Medical Services table |  |
| **Variable** | ***ICD-9-CM***** | ***ICD-10-CM*** | ***ICD-10-SE*** |
| Setting of first AF diagnosis | Categorized as outpatient, inpatient, emergency department, or other (including long-term care or skilled nursing facilities) | Categorized as outpatient, inpatient, emergency department, or other (including long-term care or skilled nursing facilities) | NA |
| Year of the index date | Continuous, years | Continuous, years | Continuous, years |
| Months between the first diagnosis of AF and the index date | Continuous, months  See Section 3.3 for definition of AF | Continuous, months  See Section 3.3 for definition of AF | Continuous, months  See Section 3.3 for definition of AF |

| **Variable** | ***ICD-9-CM***** | ***ICD-10-CM*** | ***ICD-10-SE*** |
| --- | --- | --- | --- |
| Prescriber specialty on index date - | Dronedarone or sotalol prescription where taxonomy code 1 or 2 is any of the following: | | NA |
| general practitioner | 207VG0400X, 208000000X, 208D00000X, 363AM0700X, 363LA2200X, 363LC1500X, 363LF0000X, | |  |
|  | 363LP0200X, 207Q00000X, 207QA0000X, 207QA0505X, 207QG0300X, 207R00000X, 207RA0000X, | |  |
|  | 207RG0300X, 2080A0000X, 363A00000X, 363L00000X, 363LG0600X, 363LP2300X, 363LW0102X | |  |
|  | AND | |  |
|  | The other taxonomy code is NOT any of the following: | |  |
|  | 204D00000X, 204E00000X, 204F00000X, 207K00000X, 207KI0005X, 207LH0002X, 207LP2900X, | |  |
|  | 207N00000X, 207NP0225X, 207NS0135X, 207PE0004X, 207PH0002X, 207PP0204X, 207PS0010X, | |  |
|  | 207QA0401X, 207QB0002X, 207RA0002X, 207RA0401X, 207RC0000X, 207RE0101X, 207RH0003X, | |  |
|  | 207RH0005X, 207RI0001X, 207RI0200X, 207RP1001X, 207RS0010X, 207RS0012X, 207RT0003X, | |  |
|  | 207SG0205X, 207SM0001X, 207U00000X, 207UN0901X, 207UN0903X, 207V00000X, 207VB0002X, | |  |
|  | 207VC0200X, 207VE0102X, 207W00000X, 207WX0107X, 207WX0108X, 207WX0120X, 207WX0200X, | |  |
|  | 207XS0106X, 207XS0114X, 207XX0005X, 207XX0801X, 207Y00000X, 207YX0602X, 207YX0905X, | |  |
|  | 207ZC0500X, 207ZD0900X, 207ZH0000X, 207ZM0300X, 207ZP0007X, 207ZP0102X, 207ZP0105X, | |  |
|  | 2080B0002X, 2080C0008X, 2080H0002X, 2080N0001X, 2080P0008X, 2080P0201X, 2080P0202X, | |  |
|  | 2080P0204X, 2080P0206X, 2080P0207X, 2080P0208X, 2080P0214X, 2080P0216X, 2080T0002X, | |  |
|  | 208100000X, 2081N0008X, 2081P0301X, 2081P2900X, 2082S0105X, 2083A0300X, 2083P0011X, | |  |
|  | 2083P0500X, 2083T0002X, 2084A0401X, 2084B0040X, 2084N0600X, 2084P0005X, 2084P0015X, | |  |
|  | 2084P0800X, 2084P0805X, 2084S0010X, 2085B0100X, 2085D0003X, 2085H0002X, 2085N0700X, | |  |
|  | 2085P0229X, 2085R0203X, 2085R0204X, 2085U0001X, 2086H0002X, 2086S0102X, 2086S0120X, | |  |
|  | 2086S0129X, 208800000X, 2088P0231X, 208G00000X, 208VP0000X, 208VP0014X, 363AS0400X, | |  |
|  | 363LA2100X, 363LC0200X, 363LN0000X, 363LN0005X, 363LP0222X, 363LP0808X, 363LP1700X, | |  |
|  | 363LS0200X, 363LX0001X, 202K00000X, 204C00000X, 204R00000X, 207KA0200X, 207L00000X, | |  |
|  | 207LA0401X, 207LC0200X, 207LP3000X, 207ND0101X, 207ND0900X, 207NI0002X, 207P00000X, | |  |
|  | 207PE0005X, 207PT0002X, 207QH0002X, 207QS0010X, 207QS1201X, 207RA0001X, 207RA0201X, | |  |
|  | 207RB0002X, 207RC0001X, 207RC0200X, 207RG0100X, 207RH0000X, 207RH0002X, 207RI0008X, | |  |
|  | 207RI0011X, 207RM1200X, 207RN0300X, 207RR0500X, 207RX0202X, 207SC0300X, 207SG0201X, | |  |
|  | 207SG0202X, 207SG0203X, 207T00000X, 207UN0902X, 207VF0040X, 207VH0002X, 207VM0101X, | |  |
|  | 207VX0000X, 207VX0201X, 207WX0009X, 207WX0109X, 207WX0110X, 207X00000X, 207XP3100X, | |  |
|  | 207XS0117X, 207XX0004X, 207YP0228X, 207YS0012X, 207YS0123X, 207YX0007X, 207YX0901X, | |  |
|  | 207ZB0001X, 207ZC0006X, 207ZF0201X, 207ZI0100X, 207ZN0500X, 207ZP0101X, 207ZP0104X, | |  |
|  | 207ZP0213X, 2080I0007X, 2080P0006X, 2080P0203X, 2080P0205X, 2080P0210X, 2080S0010X, | |  |
|  | 2080S0012X, 2080T0004X, 2081H0002X, 2081P0004X, 2081P0010X, 2081S0010X, 208200000X, | |  |
|  | 2082S0099X, 2083A0100X, 2083B0002X, 2083C0008X, 2083P0901X, 2083S0010X, 2083X0100X, | |  |
|  | 2084A2900X, 2084B0002X, 2084D0003X, 2084F0202X, 2084H0002X, 2084N0008X, 2084N0400X, | |  |
|  | 2084N0402X, 2084P0301X, 2084P0802X, 2084P0804X, 2084P2900X, 2084S0012X, 2084V0102X, | |  |
|  | 2085N0904X, 2085R0001X, 2085R0202X, 2085R0205X, 208600000X, 2086S0105X, 2086S0122X, | |  |

| **Variable** | ***ICD-9-CM***** | ***ICD-10-CM*** | ***ICD-10-SE*** |
| --- | --- | --- | --- |
|  | 2086S0127X, 2086X0206X, 2088F0040X, 208C00000X, 208M00000X, 208U00000X, 209800000X,  363LX0106X | |  |
| Prescriber specialty on index date - cardiologist | Dronedarone or sotalol prescription where taxonomy code 1 or 2 is as follows:  207RC0001X, 207UN0901X, 2080P0202X, 207RA0001X, 207RA0002X, 207RC0000X, 207RI0011X,  208G00000X | | NA |
| Prescriber specialty on index date - electrophysiologist | Dronedarone or sotalol prescription where taxonomy code 1 or 2 is as follows: 207RC0001X | | NA |
| Prescriber specialty on index date - other | Dronedarone or sotalol prescription where taxonomy codes 1 and 2 are not any of the NUCC taxonomy codes included for general practitioner, cardiologist, or electrophysiologist | | NA |
| Number of cardiologist visits | Count of visits during the 180 days prior to the index date (continuous)  Cardiologist visits defined as claims or encounter records with any of the following provider types in the provider specialty field: cardiovascular disease, cardiology, pediatric cardiology, cardiovascular surgery, or cardiothoracic surgery in inpatient or outpatient setting | Count of visits during the 180 days prior to the index date (continuous)  Cardiologist visits defined as claims or encounter records with any of the following provider types in the provider specialty field: cardiovascular disease, cardiology, pediatric cardiology, cardiovascular surgery, or cardiothoracic surgery in inpatient or outpatient setting | NA |
| Number of ER visits | Count of emergency department visit claims or encounter records during the 180 days prior to the index date (continuous) | Count of emergency department visit claims or encounter records during the 180 days prior to the index date (continuous) | NA |

| **Variable** | ***ICD-9-CM***** | ***ICD-10-CM*** | ***ICD-10-SE*** |
| --- | --- | --- | --- |
| Number of inpatient visits | Count of inpatient visit claims or encounter records during the 180 days prior to the index date (continuous) | Count of inpatient visit claims or encounter records during the 180 days prior to the index date (continuous) | Count of hospitalizations with overnight stay during the 180 days prior to the index date (continuous) |
| AF-related inpatient visit | Inpatient visit claim or encounter record where AF is the primary diagnosis during the 180 days prior to the index date | Inpatient visit claim or encounter record where AF is the primary diagnosis during the 180 days prior to the index date | Hospitalizations with overnight stay and AF as the principal diagnosis during the 180 days prior to the index date |
| Non–AF-related inpatient visits | Inpatient visit claim or encounter record where AF is not the primary diagnosis during the 180 days prior to the index date | Inpatient visit claim or encounter record where AF is not the primary diagnosis during the 180 days prior to the index date | Hospitalization with overnight stay where AF is not the principal diagnosis during the 180 days prior to the index date |
| Number of outpatient visits | Count of visits during the 180 days prior to the index date (continuous) | Count of visits during the 180 days prior to the index date (continuous) | Count of visits during the 180 days prior to the index date (continuous)  Outpatient visits include visits to emergency departments that do not lead to hospitalization and visits to hospitals or hospital-affiliated specialized open clinics. Outpatient visits do not include visits in primary care |

| **Variable** | ***ICD-9-CM***** | ***ICD-10-CM*** | ***ICD-10-SE*** |
| --- | --- | --- | --- |
| Number of electrocardiograms (ECGs) | Count of procedures during the 180 days prior to the index date (continuous)  Any inpatient or ambulatory encounter with any of the following procedure codes:  CPT/HCPCS: 0295T, 0296T, 0297T, 0298T, 93000, 93005, 93010, 93040, 93041, 93042, 93228, 93229,  93268, 93270, 93271, 93272, 93278, 93224, 93225,  93226, 93227  *ICD-9-CM*: 89.50, 89.51, 89.52, 89.53, 89.54, 89.55,  89.56, 89.57 | Count of procedures during the 180 days prior to the index date (continuous)  Any inpatient or ambulatory encounter with any of the following procedure codes:  CPT/HCPCS: 0295T, 0296T, 0297T, 0298T, 93000, 93005, 93010, 93040, 93041, 93042, 93228, 93229,  93268, 93270, 93271, 93272, 93278, 93224, 93225,  93226, 93227, 93000, 93005, 93040, 93041  *ICD-10-CM*: 4A02X4A, 4A02X4Z, 4A02XFZ, 4A12X45, 4A12X4Z | NA |
| Left ventricular ejection fraction (LVEF)  - continuous | Proportion (excluding values <10% or >75%, or when evidence of concurrent atrial flutter or fibrillation is present) | | NA |
| Left ventricular ejection fraction  - categorical | Categorized as (1) LVEF ≥50%, (2) LVEF 41–49%, (3) LVEF ≤40%, (4) LVEF missing with history of systolic heart failure, and (5) LVEF missing with no history of systolic heart failure | | NA |
| Heart rate | Continuous, as determined by ECG results (excluding values when evidence of concurrent atrial flutter or fibrillation is present); values >120 bpm will be excluded | Continuous, as determined by ECG results (excluding values when evidence of concurrent atrial flutter or fibrillation is present); values >120 bpm will be excluded | NA |
| PQ interval | Continuous, as determined by ECG results (excluding values when evidence of concurrent atrial flutter or fibrillation is present; values <80 ms or >500 ms will be excluded) | Continuous, as determined by ECG results (excluding values when evidence of concurrent atrial flutter or fibrillation is present; values <80 ms or >500 ms will be excluded) | NA |
| QRS width | Continuous, as determined by ECG results (excluding values when evidence of concurrent atrial flutter or fibrillation is present); values <80 ms or >240 ms will | Continuous, as determined by ECG results (excluding values when evidence of concurrent atrial flutter or fibrillation is present); values <80 ms or >240 ms will | NA |

| **Variable** | ***ICD-9-CM***** | ***ICD-10-CM*** | ***ICD-10-SE*** |
| --- | --- | --- | --- |
|  | be excluded | be excluded |  |
| QT time corrected | Continuous, as determined by ECG results (excluding values when evidence of concurrent atrial flutter or fibrillation is present); values <360 ms or >520 ms will be excluded | Continuous, as determined by ECG results (excluding values when evidence of concurrent atrial flutter or fibrillation is present); values <360 ms or >520 ms will be excluded | NA |
| Time from AF diagnosis to initiation of thromboprophylaxis | Continuous, days  Patients initiating thromboprophylaxis prior to their AF diagnosis will have negative values for this variable  See Section 3.6 for definition of oral anticoagulants for thromboprophylaxis | Continuous, days  Patients initiating thromboprophylaxis prior to their AF diagnosis will have negative values for this variable  See Section 3.6 for definition of oral anticoagulants for thromboprophylaxis | NA |
| Alcohol-related diagnosis | NA | NA | Any inpatient or ambulatory encounter with an *ICD-10- SE* diagnosis code beginning with E24.4, F10, G312, G621, G721, K292, K70, K860, O354, P043, Q860, T51, Y90, Y91, or Z714 |
| Atrial flutter | NA | NA | Any inpatient or ambulatory encounter with an *ICD-10- SE* diagnosis code of I48.3, I48.4, or I48.92 measured in any diagnosis position (e.g., primary, secondary) |
| CHA2DS2-VASc score*** | Components (see below) assessed in the 180 days prior to the index date unless otherwise noted. Each component will add 1 point to a patient’s score with the exception of “Age 75 or older” and “Stroke, TIA, or TE,” which will add 2 points | Components (see below) assessed in the 180 days prior to the index date unless otherwise noted. Each component will add 1 point to a patient’s score with the exception of “Age 75 or older” and “Stroke, TIA, or TE,” which will add 2 points | Components (see below) assessed in the 180 days prior to the index date unless otherwise noted. Each component will add 1 point to a patient’s score with the exception of “Age 75 or older” and “Stroke, TIA, or TE,” which will add 2 points |
| CHA2DS2-VASc score component: Congestive heart failure | Any inpatient or ambulatory encounter with an *ICD-9- CM* diagnosis code of 428.* measured in any diagnosis position (e.g., primary, secondary) | Any inpatient or ambulatory encounter with an *ICD- 10-CM* diagnosis code of I11.0, I13.0, I13.2, or I50.* measured in any diagnosis position (e.g., primary, secondary) | Any inpatient or ambulatory encounter with an *ICD-10- SE* diagnosis code beginning with I11.0, I13.0, I13.2, or I50 in any diagnosis position |
| CHA2DS2-VASc score component: | ≥2 ambulatory encounters within 2 years or ≥1 | Any inpatient or ambulatory encounter with an *ICD-* | Any inpatient or ambulatory encounter with an *ICD-10-* |

| **Variable** | ***ICD-9-CM***** | ***ICD-10-CM*** | ***ICD-10-SE*** |
| --- | --- | --- | --- |
| Hypertension | inpatient encounter with an *ICD-9-CM* diagnosis code of 401*, 402*, 403*, 404*, or 405* measured in any diagnosis position (e.g., primary, secondary) | *10-CM* diagnosis code of I10, I11.0–I11.9, I12.0–I12.9, I13.0–I13.9, or I15.0–I15.9 in any diagnosis position | *SE* diagnosis code beginning with I10–I15 in any diagnosis position |
| CHA2DS2-VASc score component: Age 75 or older | Age ≥75 (true/false) will be assessed on index date | Age ≥75 (true/false) will be assessed on index date | Age ≥75 (true/false) will be assessed on index date |
| CHA2DS2-VASc score component: Diabetes mellitus | ≥2 ambulatory visits within 2 years or ≥1 inpatient encounter record with an *ICD-9-CM* diagnosis code of 250.* in any diagnosis position | ≥2 ambulatory visits within 2 years or ≥1 inpatient encounter record with an *ICD-10-CM* diagnosis code of E10.0–E10.9 or E11.0–E11.9 in any diagnosis position | Any inpatient or ambulatory encounter with an *ICD-10- SE* diagnosis code beginning with E10–E14 in any diagnosis position |
| CHA2DS2-VASc score component: Stroke, TIA, or TE | Any inpatient or ambulatory encounter with an *ICD-9-CM* diagnosis code of 362.3*, 410.*, 411.1, 412.*, 413.*, 438*, 441.3, 441.4, 444.81, 440.0, 440.2*, 445.*, 451*, 453.2, 453.8*, or 453.9 in any diagnosis position | Any inpatient or ambulatory encounter with an *ICD- 10-CM* diagnosis code of G45.*, I63.*, I69.3*, or I74.* in any diagnosis position | Any inpatient or ambulatory encounter with an *ICD-10- SE* diagnosis code beginning with G45, I63, I64, I69.3, I69.4, or I74 |
| CHA2DS2-VASc score component: Vascular disease | Any inpatient or ambulatory encounter with an *ICD-9- CM* diagnosis code of 410.*, 411.1, 412.*, 413.*, 441.3, 441.4, 444.81, 440.0, 440.2*, 445.*, 451*,  453.2, 453.8*, or 453.9 in any diagnosis position | Any inpatient or ambulatory encounter with an *ICD- 10-CM* diagnosis code of I21.0–I21.9, I22.0–I22.9, I70.2*, I73.9, I74.5, or I70.0 in any diagnosis position | Any inpatient or ambulatory encounter with an *ICD-10- SE* diagnosis code beginning with I21, I22, I25.2, I70, I71, I72, or I73 |
| CHA2DS2-VASc Score component: Age 65-74 years | Age 65-74 years (true/false) will be assessed on index date | Age 65-74 years (true/false) will be assessed on index date | Age 65-74 years (true/false) will be assessed on index date |
| CHA2DS2-VASc Score component: Female sex | Sex (female=true) will be assessed on index date | Sex (female=true) will be assessed on index date | Sex (female=true) will be assessed on index date |
| Hypertension | ≥2 ambulatory encounters within 2 years or ≥1 inpatient encounter with an *ICD-9-CM* diagnosis code of 401*, 402*, 403*, 404*, or 405* measured in any diagnosis position (e.g., primary, secondary) | ≥2 ambulatory encounters within 2 years or ≥1 inpatient encounter with an *ICD-10-CM* diagnosis code of I10, I11.*, I12.*, I13.*, or I15.* measured in any diagnosis position (e.g., primary, secondary) | Any inpatient or ambulatory encounter with an *ICD-10- SE* diagnosis code beginning with I10–I15 in any diagnosis position |
| Diabetes mellitus | ≥2 ambulatory visits within 2 years or ≥1 inpatient | ≥2 ambulatory visits within 2 years or ≥1 inpatient | Any inpatient or ambulatory encounter with an *ICD-10-* |

| **Variable** | ***ICD-9-CM***** | ***ICD-10-CM*** | ***ICD-10-SE*** |
| --- | --- | --- | --- |
|  | encounter record with an *ICD-9-CM* diagnosis code of 250.* measured in any diagnosis position (e.g., primary, secondary) | encounter record with an *ICD-10-CM* diagnosis code of E10.*–E11.* measured in any diagnosis position (e.g., primary, secondary) | *SE* diagnosis code beginning with E10–E14 in any diagnosis position |
| Stroke or TIA | Any inpatient or ambulatory encounter with an *ICD-9- CM* diagnosis code of 362.3*, 430, 431, 432.*, 433.*1, 434.* (with the exception of 434.90), 435.*, 438.*, or  997.02 measured in any diagnosis position (e.g., primary, secondary) | Any inpatient or ambulatory encounter with an *ICD- 10-CM* diagnosis code of G45.*, G97.3*, I60.*, I61.*, I63.*, I69.3*, I97.81*, or I97.82* measured in any diagnosis position (e.g., primary, secondary) | Stroke subtypes and TIA will be reported separately in the Swedish study  Any ambulatory or inpatient encounter will be considered if there is an *ICD-10-SE* code in any diagnosis position beginning with the following:  Any stroke (ischemic or hemorrhagic): I60–I64 or I69.0– I69.4  Ischemic stroke: I63 or I69.3  Intracerebral bleeding: I61 or I691  Other intracranial bleeding: I60, I62, I690, I692, S064, S065, or S066  TIA: G45 |
| Systemic embolism | Any inpatient or ambulatory encounter with an *ICD-9-CM* diagnosis code of 444* in the primary position | Any inpatient or ambulatory encounter with an *ICD-10-CM* diagnosis code of I74.* in the primary position | Any inpatient or ambulatory encounter with an *ICD-10- SE* diagnosis code beginning with I74 in any diagnosis position |
| Congestive heart failure | Any ambulatory encounter with an *ICD-9-CM* diagnosis code of 428.* measured in any diagnosis position (e.g., primary, secondary) or inpatient encounter with an *ICD-9-CM* diagnosis code of 428.* | Any ambulatory encounter with an *ICD-10-CM* diagnosis code of I11.0, I13.0, I13.2, or I50.* measured in any diagnosis position (e.g., primary, secondary, etc.) or inpatient encounter with an *ICD-10-CM* | Any ambulatory encounter with an *ICD-10-SE* diagnosis code beginning with I11.0, I13.0, I13.2, or I50 in any diagnosis position or inpatient encounter with an *ICD-10-CM* diagnosis code of I11.0, I13.0, I13.2, |

| **Variable** | ***ICD-9-CM***** | ***ICD-10-CM*** | ***ICD-10-SE*** |
| --- | --- | --- | --- |
|  | that is not in the primary position | diagnosis code of I11.0, I13.0, I13.2, or I50.* that is not in the primary position | or I50.* that is not in the primary position |
| Myocardial infarction (MI) | Any inpatient or ambulatory encounter with an *ICD-9-CM* diagnosis code of 410 measured in any diagnosis position (e.g., primary, secondary) | Any inpatient or ambulatory encounter with an *ICD-10-CM* diagnosis code of I21.0*, I21.1*, I21.2*, I21.3*, I21.4*, I21.9*, I21.A*, or I22.* measured in any diagnosis position (e.g., primary, secondary) | Any inpatient or ambulatory encounter with an *ICD-10-* *SE* diagnosis code beginning with I2.1, I22, or I25.2 |
| Chronic renal disease | Any inpatient or ambulatory encounter with the following:  an *ICD-9-CM* diagnosis code of 403.01, 403.11, 403.91, 404.02, 404.03, 404.12, 404.13, 404.92, 404.93,  458.21, 584.*, 585.3, 585.4, 585.5, 585.6, 792.5,  996.56, 996.68, 996.73, E879.1, 585.*, 586.*, V42.0,  V45.1*, or V56.* measured in any diagnosis position (e.g., primary, secondary)   an *ICD-9-CM* procedure code of 39.27, 39.95, 54.98,  55.53, 55.54, 38.95, 39.42, 55.52 | Any inpatient or ambulatory encounter with the following:  an *ICD-10-CM* diagnosis code of A36.84, A98.5, B52.0, B58.83, I12.0, I13.11, I13.2, I95.3, M32.15,  M35.04, N01.0, N01.1, N01.6, N01.8, N01.9, N07.0,  N07.1, N07.6, N07.8, N07.9, N14.*, N15.0, N17.*,  N18.1, N18.2, N18.3, N18.4, N18.5, N18.6, N18.9, N19, N99.0, O03.32, O03.82, O04.82, O07.32, O08.4, O90.4, R88.0, T81.5*2, T82.4*, T85.6*1, T85.71, T86.11, T86.12, Y62.2, Y84.1, Z49.01, Z49.02, Z49.31, Z49.32, Z91.15, Z94.0, or Z99.2 measured in  any diagnosis position (e.g., primary, secondary, etc.)  an *ICD-10-CM* procedure code of 3E1M39Z, 5A1D70Z, 5A1D80Z, 5A1D90Z, 0TT00ZZ,  0TT04ZZ, 0TT10ZZ, 0TT14ZZ, 0TT20ZZ, 0TT24ZZ | Any inpatient or ambulatory encounter with an *ICD-10- SE* diagnosis code beginning with N18 |
| Chronic pulmonary disease | Any inpatient or ambulatory encounter with an *ICD-9- CM* diagnosis code of 416.9, 490.*–496.*, 506.4,  or 508.1 measured in any diagnosis position (e.g., primary, secondary) | Any inpatient or ambulatory encounter with an *ICD- 10-CM* diagnosis code of I27.8*, I27.9, J40.*–J47.*, J60.*–J67.*, J68.4, J70.1, or J70.3 measured in any diagnosis position (e.g., primary, secondary) | Any inpatient or ambulatory encounter with an *ICD-10- SE* diagnosis code beginning with I27.8, I27.9, J40–J47, J60–J67, J68.4, J70.1, or J70.3 |
| Mental health disorders | Any inpatient or ambulatory encounter with an *ICD-9- CM* diagnosis code of 290.*–319.* measured in any diagnosis position (e.g., primary, secondary) | Any inpatient or ambulatory encounter with an *ICD-10-CM* diagnosis code of F01.*–F99.* measured in any diagnosis position (e.g., primary, secondary) | Any inpatient or ambulatory encounter with an *ICD-10-* *SE* diagnosis code in chapter F |

| **Variable** | ***ICD-9-CM***** | ***ICD-10-CM*** | ***ICD-10-SE*** |
| --- | --- | --- | --- |
| Hypercholesterolemia | Any inpatient or ambulatory encounter with an *ICD-9- CM* diagnosis code of 272.0 measured in any diagnosis position (e.g., primary, secondary) | Any inpatient or ambulatory encounter with an *ICD- 10-CM* diagnosis code of E78.0* measured in any diagnosis position (e.g., primary, secondary) | Any inpatient or ambulatory encounter with an *ICD-10- SE* diagnosis code beginning with E78.0 |
| Ischemic heart disease (subsequent MI, other acute ischemic heart disease, chronic ischemic heart disease) or previous revascularization (CABG or PCI) | Any inpatient or ambulatory encounter with an *ICD-9- CM* diagnosis code of 410*–414* measured in any diagnosis position (e.g., primary, secondary) or any of the following CPT/HCPCS procedure codes: 33519, 33521, 33522, 33523, 33533, S2205, S2206,  S2207, S2208, S2209, 33510, 33511, 33512, 33513,  33514, 33516, 33517, 33518, 33534, 33535, 33536,  3351F, 92920, 92921, 92924, 92925, 92928, 92929,  92933, 92934, 92937, 92938, 92941, 92943, 92944,  92973, 92974, 92975, 92978, 92979, 93571, 93572, C9600, C9601 | Any inpatient or ambulatory encounter with an *ICD- 10-CM* diagnosis code of I20*–I25* measured in any diagnosis position (e.g., primary, secondary) or any of the following CPT/HCPCS procedure codes: 33519, 33521, 33522, 33523, 33533, S2205, S2206,  S2207, S2208, S2209, 33510, 33511, 33512, 33513,  33514, 33516, 33517, 33518, 33534, 33535, 33536,  3351F, 92920, 92921, 92924, 92925, 92928, 92929,  92933, 92934, 92937, 92938, 92941, 92943, 92944,  92973, 92974, 92975, 92978, 92979, 93571, 93572, C9600, C9601 | Ischemic heart disease without history of MI: Any inpatient or ambulatory encounter with an *ICD-10-SE* diagnosis code beginning with I20, I24, or I25 without any previous occurrence of codes I21,  I22, or I252  or  Ischemic heart disease with history of MI: Any inpatient or ambulatory encounter with an *ICD-10-SE* diagnosis code beginning with I21, I22, or I252 |
| Peripheral artery disease | Any inpatient or ambulatory encounter with an *ICD-9- CM* diagnosis code of 443.0, 443.1, 443.82, 443.89,  or 443.9 measured in any diagnosis position (e.g., primary, secondary) | Any inpatient or ambulatory encounter with an *ICD- 10-CM* diagnosis code of I73* measured in any diagnosis position (e.g., primary, secondary) | Any inpatient or ambulatory encounter with an *ICD-10- SE* diagnosis code beginning with I70–I73 |
| QT prolongation | Any inpatient or ambulatory encounter with an *ICD-9- CM* diagnosis code of 426.82 measured in any diagnosis position (e.g., primary, secondary) | Any inpatient or ambulatory encounter with an *ICD- 10-CM* diagnosis code of I45.81 measured in any diagnosis position (e.g., primary, secondary) | NA |
| Valvular disease | Any inpatient or ambulatory encounter with an *ICD-9- CM* diagnosis code of 395.*, 397.0, 396.*, 424.*, 394.*, V43.3, or V42.2 measured in any diagnosis position (e.g., primary, secondary) | Any inpatient or ambulatory encounter with an *ICD- 10-C*M diagnosis code of I06.*–I08.*, I34.*–I39.*, I05.*, Z95.2, Z95.3, or Z95.4 measured in any diagnosis position (e.g., primary, secondary) | Any inpatient or ambulatory encounter with an *ICD-10- SE* diagnosis code of I05.0*, I05.2*, Q23.2*, or Z95.2* or the NOMESCO surgery codes with FGE00, FJF00, FKD00, or FMD00 |

| **Variable** | ***ICD-9-CM***** | ***ICD-10-CM*** | ***ICD-10-SE*** |
| --- | --- | --- | --- |
| Cardiomyopathy or congenital heart anomalies of the heart | Any inpatient or ambulatory encounter with an *ICD-9- CM* diagnosis code of 425.* or 426.* measured in any diagnosis position (e.g., primary, secondary) | Any inpatient or ambulatory encounter with an *ICD- 10-CM* diagnosis code of I42.*, I44.*, or I45.* measured in any diagnosis position (e.g., primary, secondary) | Any inpatient or ambulatory encounter with an *ICD-10-* *SE* diagnosis code of I42*or Q20*–Q24* |

CABG=coronary artery bypass grafting; CHA2DS2-VASc=congestive heart failure, hypertension, age ≥75 years, diabetes mellitus, stroke or transient ischemic attack, vascular disease, age 65 to 74 years, sex category; CM=Clinical Modification; CPT=Current Procedural Terminology; HCPCS=Healthcare Common Procedure Coding System; *ICD*=*International Classification of Diseases*; NA=not assessed; NOMESCO=Nordic Medico-Statistical Committee; NUCC=National Uniform Claim Committee; PCI=percutaneous coronary intervention; SE=Swedish Edition; TE=thromboembolism; TIA=transient ischemic attack.

*Symbolizes any number of coding positions with any value are acceptable codes.

**The Outcome Assessment Period begins after the transition to *ICD-10-SE* for diagnosis coding in Sweden; *ICD-9-CM* codes will be used in US analyses only.

***Definitions for the CHA2DS2-VASc score were developed based on a publication by Lang et al.39 Based on clinical expert review, the definitions were further refined to be more specific and clinically relevant.

# Concomitant Therapy Definitions

| **Variable** | **Optum and MarketScan Definition** | **VHA EHR Definition** | **Swedish NPR Definition** |
| --- | --- | --- | --- |
| AF ablation procedure | Any inpatient encounter with ≥1 of the following procedure codes:  CPT/HCPCS codes: 93656, 93657 | Any inpatient encounter with ≥1 of the following procedure codes:  CPT/HCPCS codes: 93656, 93657 | Any occurrence of NOMESCO surgery code FPD00, FPD96, FPB32, or KVÅ procedure codes DF001 or DF003 |
| Beta-blocking agents | Any outpatient prescription claim with the “C07” WHO ATC code prefix (excluding “C07BA07” or “C07FX02” or prescriptions with the generic name “sotalol HCL”) | Defined via NDC codes | Dispensed medication with WHO ATC code beginning with “C07” except C07AA07 (sotalol) |
| Calcium channel blockers | Any outpatient prescription claim with any of the following WHO ATC code prefixes: C07FB, C08, C09BB, C09DB, C10BX03, C10BX07, C10BX09, C10BX11, C10BX14, C10BX18 | Defined via NDC codes | Dispensed medication with WHO ATC code beginning with “C08” |

| **Variable** | **Optum and MarketScan Definition** | **VHA EHR Definition** | **Swedish NPR Definition** |
| --- | --- | --- | --- |
| Cardioversion | The occurrence of a medical claim with any of the following diagnosis or procedure codes in any claim line position:  *ICD-9-CM* procedure: 99.61, 99.62  *ICD-10-CM* procedure: 5A2204Z  CPT: 92960, 92961 | The occurrence of a medical record with any of the following procedure codes in any position:  *ICD-9-CM* procedure: 99.61, 99.62  *ICD-10-CM* procedure: 5A2204Z  CPT: 92960, 92961 | Any inpatient or ambulatory encounter with a KVÅ procedure code “DF026” or “DF027” |
| Cardioversion, time since last procedure, days | The number of days since the most recent cardioversion during the baseline period excluding the index date measured as follows:  No cardioversion  Cardioversion within 2 days of the index date Cardioversion >2 days prior to the index date | The number of days since the most recent cardioversion during the baseline period excluding the index date measured as follows:  No cardioversion  Cardioversion within 2 days of the index date Cardioversion >2 days prior to the index date | The number of days since the most recent cardioversion during the180 days prior to the index date (exclusive of the index date) measured as follows:  No cardioversion  Cardioversion within 2 days of the index date Cardioversion >2 days prior to the index date |
| Digoxin | Any outpatient prescription claim with the generic name “digoxin” or the “C01AA05” WHO ATC code prefix. Only tablets and liquid formulations will be considered | Defined via NDC codes. Only tablets and liquid formulations will be considered | Dispensed medication with the following WHO ATC code: C01AA05. Drug strength will be reported as 0.13 or 0.25 mg |

| **Variable** | **Optum and MarketScan Definition** | **VHA EHR Definition** | **Swedish NPR Definition** |
| --- | --- | --- | --- |
| Dronedarone, total daily dose | Among patients initiating dronedarone on cohort entry, total daily dose will be calculated based on the drug strength, quantity dispensed, and days’ supply using the following formula: (drug strength [in mg]*quantity dispensed)/days’ supply.  Prescriptions with days’ supply <0 or >365 or quantity dispensed <0 or >600 will be excluded. If multiple prescriptions were filled on the same day, concurrent use of the drug will be assumed. If prescriptions were filled on different days but overlap with each other, the patient will be assumed to begin taking the subsequent fill immediately and the overlapping drug will not be shifted forward | Among patients initiating dronedarone on cohort entry, total daily dose will be calculated based on the drug strength, quantity dispensed, and days’ supply using the following formula: (drug strength [in mg]*quantity dispensed)/days’ supply.  Dispensed medications with days’ supply <0 or >365 or quantity dispensed <0 or >600 will be excluded. If multiple prescriptions were filled on the same day, concurrent use of the drug will be assumed. If prescriptions were filled on different days but overlap with each other, the patient will be assumed to begin taking the subsequent fill immediately and the overlapping drug will not be shifted forward | NA |
| Ezetimibe | Any outpatient prescription claim with the generic name “ezetimibe” | Defined via NDC codes | Dispensed medication with the following WHO ATC code: C10AX09 |
| Ezetimibe, number of prescriptions | Continuous, number of outpatient prescription claims | Continuous, number of outpatient prescriptions | Continuous, number of prescription claims |
| Oral anticoagulants for thromboprophylaxis | The occurrence of any outpatient prescription claim with the following generic names:  “Warfarin Sodium,” “Apixaban,” “Edoxaban Tosylate,” “Dabigatran Etexilate Mesylate,” “Rivaroxaban” | The occurrence of any outpatient dispensed medication for the following (defined via NDC codes):  “Warfarin Sodium,” “Apixaban,” “Edoxaban Tosylate,” “Dabigatran Etexilate Mesylate,” “Rivaroxaban” | Dispensed medication with the following WHO ATC codes: B01AA03, B01AE07, B01AF01, B01AF02, or B01AF03 |

| **Variable** | **Optum and MarketScan Definition** | **VHA EHR Definition** | **Swedish NPR Definition** |
| --- | --- | --- | --- |
| Proarrhythmic medications, time since last use | Continuous, days  Among patients who have an outpatient prescription for or medical administration of oral proarrhythmic medications (defined above) during baseline, the number of days from the most recent run-out date during the baseline period to 1 day prior to the index date | Continuous, days  Among patients who have an outpatient prescription for oral proarrhythmic medications (defined above) during baseline, the number of days from the most recent run- out date during the baseline period to 1 day prior to the index date | Continuous, days  Among patients who have a claim for oral proarrhythmic medications (defined above) in the 180 days prior to index, the number of days from the most recent run-out date to the index date (exclusive of the index date) |
| Pulmonary medications | Any outpatient prescription claim with the “R03” WHO ATC code prefix | Defined via NDC codes | Dispensed medication with WHO ATC code beginning with “R03” |
| Proprotein convertase subtilisin/kexin type 9 (PCSK9) inhibitor, any, number of prescriptions | The occurrence of any outpatient prescription claim with the following generic names: “alirocumab” or “evolocumab” | The occurrence of any outpatient dispensed medication for the following (defined via NDC codes): “alirocumab” or “evolocumab” |  |
| Sotalol, total daily dose | Among patients initiating sotalol on cohort entry, total daily dose will be calculated based on the drug strength, quantity dispensed, and days’ supply using the following formula: (drug strength [in mg]*quantity dispensed)/days’ supply.  Prescriptions with days’ supply <0 or >365 or quantity dispensed <0 or >600 will be excluded. If multiple prescriptions were filled on the same day, concurrent use of the drug will be assumed. If prescriptions were filled on different days but overlap with each other, the patient will be assumed to begin taking the subsequent fill immediately and the overlapping drug will not be shifted forward | Among patients initiating sotalol on cohort entry, total daily dose will be calculated based on the drug strength, quantity dispensed, and days’ supply using the following formula: (drug strength [in mg]*quantity dispensed)/days’ supply.  Dispensed medications with days’ supply <0 or >365 or quantity dispensed <0 or >600 will be excluded. If multiple prescriptions were filled on the same day, concurrent use of the drug will be assumed. If prescriptions were filled on different days but overlap with each other, the patient will be assumed to begin taking the subsequent fill immediately and the overlapping drug will not be shifted forward | NA |

| **Variable** | **Optum and MarketScan Definition** | **VHA EHR Definition** | **Swedish NPR Definition** |
| --- | --- | --- | --- |
| Statins | Any outpatient prescription claim with the following generic names: “simvastatin,” “lovastatin,” “pravastatin,” “fluvastatin,” “atorvastatin,” “cerivastatin,” “rosuvastatin,” or “pitavastatin” | Any outpatient dispensed medication for the following (defined via NDC codes): “simvastatin,” “lovastatin,” “pravastatin,” “fluvastatin,” “atorvastatin,” “cerivastatin,” “rosuvastatin,” or “pitavastatin” | Dispensed medication with WHO ATC code beginning with “C10AA” |

AF=atrial fibrillation; ATC=Anatomical Therapeutic Chemical; CM=Clinical Modification; CPT=Current Procedural Terminology; HCL=hydrochloride; HCPCS=Healthcare Common Procedure
Coding System; ICD=International Classification of Diseases; KVÅ=Classification of Health Interventions (Klassifikation av vårdåtgärder); MarketScan=Merative MarketScan database;
NDC=National Drug Code; NOMESCO=Nordic Medico-Statistical Committee; NPR=National Patient Register; Optum=Optum CDM DOD database; VHA EHR=Veterans Health Administration
Electronic Health Record; WHO=World Health Organization.

# References

1. Covis Pharma GmbH. Prescribing information for BETAPACE/BETAPACE AF. https://dailymed.nlm.nih.gov/dailymed/fda/fdaDrugXsl.cfm?setid=afce2787-8899-4098-87c8- f1e8dd19e6dd&type=display. Date Accessed: April 5, 2023
2. Friberg L. Ventricular arrhythmia and death among atrial fibrillation patients using anti-arrhythmic drugs.

*Am Heart J* 2018; 205: 118–127. doi:10.1016/j.ahj.2018.06.018

1. Claxton JS, Lutsey PL, MacLehose RF, Chen LY, Lewis TT, Alonso A. Geographic Disparities in the Incidence of Stroke among Patients with Atrial Fibrillation in the United States. *J Stroke Cerebrovasc Dis* 2019; 28: 890_899.

doi:10.1016/j.jstrokecerebrovasdis.2018.12.005

1. Chen N, Lutsey PL, MacLehose RF, et al. Association of Oral Anticoagulant Type With Risk of Dementia Among Patients With Nonvalvular Atrial Fibrillation. *J Am Heart Assoc* 2018; 7: e009561. doi:10.1161/JAHA.118.009561
2. O'Neal WT, Sandesara PB, Claxton JS, et al. Influence of Sociodemographic Factors and Provider Specialty on Anticoagulation Prescription Fill Patterns and Outcomes in Atrial Fibrillation. *Am J Cardiol* 2018; 122: 388–394. doi:10.1016/j.amjcard.2018.04.022
3. Alberts M, Chen YW, Lin JH, Kogan E, Twyman K, Milentijevic D. Risks of Stroke and Mortality in Atrial Fibrillation Patients Treated With Rivaroxaban and Warfarin. *Stroke* 2020; 51: 549–555. doi:10.1161/STROKEAHA.119.025554
4. Lip GYH, Keshishian A, Li X, et al. Effectiveness and Safety of Oral Anticoagulants Among Nonvalvular Atrial Fibrillation Patients. *Stroke* 2018; 49: 2933–2944. doi:10.1161/STROKEAHA.118.020232
5. Turakhia MP, Ziegler PD, Schmitt SK, et al. Atrial Fibrillation Burden and Short-Term Risk of Stroke: Case-Crossover Analysis of Continuously Recorded Heart Rhythm From Cardiac Electronic Implanted Devices. *Circ Arrhythm Electrophysiol* 2015; 8: 1040–1047. doi:10.1161/CIRCEP.114.003057
6. Claxton JS, MacLehose RF, Lutsey PL, et al. A new model to predict major bleeding in patients with atrial fibrillation using warfarin or direct oral anticoagulants. *PLoS One* 2018; 13: e0203599. doi:10.1371/journal.pone.0203599
7. Reps JM, Rijnbeek PR, Ryan PB. Identifying the DEAD: Development and Validation of a Patient-Level Model to Predict Death Status in Population-Level Claims Data. *Drug Saf* 2019; 42: 1377–1386. doi:10.1007/s40264-019-00827-0
8. Matcho A, Ryan P, Fife D, Gifkins D, Knoll C, Friedman A. Inferring pregnancy episodes and outcomes within a network of observational databases. *PLoS One* 2018; 13: e0192033. doi:10.1371/journal.pone.0192033
9. Jeon-Slaughter H, Chen X, Tsai S, Ramanan B, Ebrahimi R. Developing an Internally Validated Veterans Affairs Women Cardiovascular Disease Risk Score Using Veterans Affairs National Electronic Health Records. *J Am Heart Assoc* 2021; 10: e019217. doi:10.1161/JAHA.120.019217
10. Goetz MB, Hoang T, Kan VL, Rimland D, Rodriguez-Barradas M. Development and validation of an algorithm to identify patients newly diagnosed with HIV infection from electronic health records. *AIDS Res Hum Retroviruses* 2014; 30: 626–633. doi:10.1089/AID.2013.0287
11. Calhoun PS, Wilson SM, Hertzberg JS, et al. Validation of Veterans Affairs Electronic Medical Record Smoking Data Among Iraq- and Afghanistan-Era Veterans. *J Gen Intern Med* 2017; 32: 1228–1234. doi:10.1007/s11606-017-4144-5
12. Li T, Lee I, Jayakumar D, et al. Development and validation of lupus nephritis case definitions using United States veterans affairs electronic health records. *Lupus* 2021; 30: 518–526. doi:10.1177/0961203320973267
13. Franklin JM, Patorno E, Desai RJ, et al. Emulating Randomized Clinical Trials With Nonrandomized Real- World Evidence Studies: First Results From the RCT DUPLICATE Initiative. *Circulation* 2021; 143: 1002–1013. doi:10.1161/CIRCULATIONAHA.120.051718
14. Abernethy A. Coronavirus (COVID-19) Update: FDA Collaborations Promote Rigorous Analyses of Real- World Data to Inform Pandemic Response. Available at: http[s://w](http://www.fda.gov/news-events/press-)ww.f[da.gov/news-events/press-](http://www.fda.gov/news-events/press-) announcements/coronavirus-covid-19-update-fda-collaborations-promote-rigorous-analyses-real-world- data-inform. Date Accessed: May 19, 2020
15. Brookhart MA, Schneeweiss S, Rothman KJ, Glynn RJ, Avorn J, Stürmer T. Variable selection for propensity score models. *Am J Epidemiol* 2006; 163: 1149–1156. doi:10.1093/aje/kwj149
16. Austin PC. Balance diagnostics for comparing the distribution of baseline covariates between treatment groups in propensity-score matched samples. *Stat Med* 2009; 28: 3083–3107. doi:10.1002/sim.3697
17. Franklin JM, Rassen JA, Ackermann D, Bartels DB, Schneeweiss S. Metrics for covariate balance in cohort studies of causal effects. *Stat Med* 2014; 33: 1685–1699. doi:10.1002/sim.6058
18. Kipp R, Askari M, Fan J, Field ME, Turakhia MP. Real-World Comparison of Classes IC and III Antiarrhythmic Drugs as an Initial Rhythm Control Strategy in Newly Diagnosed Atrial Fibrillation: From the TREAT-AF Study. *JACC Clin Electrophysiol* 2019; 5: 231–241. doi:10.1016/j.jacep.2018.08.025
19. Friberg L, Andersson T, Rosenqvist M. Less dementia and stroke in low-risk patients with atrial fibrillation taking oral anticoagulation. *Eur Heart J* 2019; 40: 2327–2335. doi:10.1093/eurheartj/ehz304
20. VanderWeele TJ, Ding P. Sensitivity Analysis in Observational Research: Introducing the E-Value. *Ann Intern Med* 2017; 167: 268–274. doi:10.7326/M16-2607
21. Moher D, Liberati A, Tetzlaff J, Altman DG; PRISMA Group. Preferred reporting items for systematic reviews and meta-analyses: the PRISMA Statement. *Open Med* 2009; 3: e123-e130.
22. Deeks JJ, Higgins JPT, Altman DG (editors). Chapter 10: Analysing data and undertaking meta-analyses. In: Higgins JPT, Thomas J, Chandler J, Cumpston M, Li T, Page MJ, Welch VA (editors). Cochrane Handbook for Systematic Reviews of Interventions version 6.3. Cochrane, 2022. [www.training.cochrane.org/handbook](http://www.training.cochrane.org/handbook)
23. Valembois L, Audureau E, Takeda A, Jarzebowski W, Belmin J, Lafuente-Lafuente C. Antiarrhythmics for maintaining sinus rhythm after cardioversion of atrial fibrillation. *Cochrane Database Syst Rev* 2019; 9: CD005049. doi:10.1002/14651858.CD005049.pub5
24. Connolly JG, Schneeweiss S, Glynn RJ, Gagne JJ. Quantifying bias reduction with fixed-duration versus all-available covariate assessment periods. *Pharmacoepidemiol Drug Saf* 2019; 28: 665–670. doi:10.1002/pds.4729
25. Waring WS. Clinical use of antidepressant therapy and associated cardiovascular risk. *Drug Healthc Patient Saf* 2012; 4: 93–101. doi:10.2147/DHPS.S28804
26. Qin D, Leef G, Alam MB, et al. Patient outcomes according to adherence to treatment guidelines for rhythm control of atrial fibrillation. *J Am Heart Assoc* 2015; 4: e001793. doi:10.1161/JAHA.115.001793
27. Young JG, Stensrud MJ, Tchetgen Tchetgen EJ, Hernán MA. A causal framework for classical statistical estimands in failure-time settings with competing events. *Stat Med* 2020; 39: 1199–1236. doi:10.1002/sim.8471
28. Bush M, Stürmer T, Stearns SC, et al. Position matters: Validation of medicare hospital claims for myocardial infarction against medical record review in the atherosclerosis risk in communities study. *Pharmacoepidemiol Drug Saf* 2018; 27: 1085–1091. doi:10.1002/pds.4396
29. Jones SA, Gottesman RF, Shahar E, Wruck L, Rosamond WD. Validity of hospital discharge diagnosis codes for stroke: the Atherosclerosis Risk in Communities Study. *Stroke* 2014; 45: 3219–3225. doi:10.1161/STROKEAHA.114.006316
30. Goff DC Jr, Pandey DK, Chan FA, Ortiz C, Nichaman MZ. Congestive heart failure in the United States: is there more than meets the I(CD code)? The Corpus Christi Heart Project. *Arch Intern Med* 2000; 160: 197–

202. doi:10.1001/archinte.160.2.197

1. Alonso A, Agarwal SK, Soliman EZ, et al. Incidence of atrial fibrillation in whites and African-Americans: the Atherosclerosis Risk in Communities (ARIC) study. *Am Heart J* 2009; 158: 111–117. doi:10.1016/j.ahj.2009.05.010
2. Whittle J, Wickenheiser L, Venditti LN. Is warfarin underused in the treatment of elderly persons with atrial fibrillation?. *Arch Intern Med* 1997; 157: 441–445.
3. Brass LM, Krumholz HM, Scinto JM, Radford M. Warfarin use among patients with atrial fibrillation.

*Stroke* 1997; 28: 2382–2389. doi:10.1161/01.str.28.12.2382

1. McDonald KM, Hlatky MA, Saynina O, Geppert J, Garber AM, McClellan MB. Trends in hospital treatment of ventricular arrhythmias among Medicare beneficiaries, 1985 to 1995. *Am Heart J* 2002; 144: 413–421. doi:10.1067/mhj.2002.125498
2. Schneeweiss S, Robicsek A, Scranton R, Zuckerman D, Solomon DH. Veteran's affairs hospital discharge databases coded serious bacterial infections accurately. *J Clin Epidemiol* 2007; 60: 397-409. doi:10.1016/j.jclinepi.2006.07.011
3. Lang K, Bozkaya D, Patel AA, et al. Anticoagulant use for the prevention of stroke in patients with atrial fibrillation: findings from a multi-payer analysis. *BMC Health Serv Res* 2014; 14: 329. doi:10.1186/1472- 6963-14-329
